# Supplementary material
Source: publisher site journal article supplement (https://www.dovepress.com/get_supplementary_file.php?f=461529.xlsx)
Supplement: Supplementary file 1 [file get_supplementary_file.php]

## Sheet: Table S1
Cluster	Celltype (malignancy)	Celltype (major-lineage)	Celltype (minor-lineage)	Gene	log2FC	Percentage (%)	Adjusted p-value
0	Stromal cells	NK	NK	GNLY	2.5	76.3	0
0	Stromal cells	NK	NK	NKG7	2.16	99.9	0
0	Stromal cells	NK	NK	GZMB	2.05	81.8	0
0	Stromal cells	NK	NK	PRF1	1.89	76.8	0
0	Stromal cells	NK	NK	CCL5	1.85	97.3	0
0	Stromal cells	NK	NK	GZMH	1.84	85.7	0
0	Stromal cells	NK	NK	KLRD1	1.8	81	0
0	Stromal cells	NK	NK	GZMA	1.72	94	0
0	Stromal cells	NK	NK	FGFBP2	1.72	62.7	0
0	Stromal cells	NK	NK	CTSW	1.7	89.2	0
0	Stromal cells	NK	NK	CST7	1.69	93.4	0
0	Stromal cells	NK	NK	CCL4	1.64	74.1	0
0	Stromal cells	NK	NK	KLRB1	1.57	43.4	0
0	Stromal cells	NK	NK	TRDC	1.55	35.3	0
0	Stromal cells	NK	NK	CMC1	1.53	64	0
0	Stromal cells	NK	NK	KLRF1	1.48	40.1	0
0	Stromal cells	NK	NK	HOPX	1.44	63.3	0
0	Stromal cells	NK	NK	IL32	1.39	87	0
0	Stromal cells	NK	NK	CD7	1.39	57.5	0
0	Stromal cells	NK	NK	TRGC2	1.36	50.2	0
0	Stromal cells	NK	NK	TRBC1	1.3	59.7	0
0	Stromal cells	NK	NK	CD3D	1.3	72.5	0
0	Stromal cells	NK	NK	CD247	1.26	53.1	0
0	Stromal cells	NK	NK	SPON2	1.24	35.1	0
0	Stromal cells	NK	NK	ID2	1.17	82.8	0
0	Stromal cells	NK	NK	HCST	1.17	92.4	0
0	Stromal cells	NK	NK	CLIC3	1.16	36.8	0
0	Stromal cells	NK	NK	GZMM	1.15	62.3	0
0	Stromal cells	NK	NK	CD3E	1.13	71.8	0
0	Stromal cells	NK	NK	TRAC	1.1	61.5	0
0	Stromal cells	NK	NK	RARRES3	1.09	72	0
0	Stromal cells	NK	NK	TRBC2	1.08	65.7	0
0	Stromal cells	NK	NK	CD69	1.04	57.4	0
0	Stromal cells	NK	NK	CD8A	1.04	47.1	0
0	Stromal cells	NK	NK	DUSP2	1.03	69.4	0
0	Stromal cells	NK	NK	LCK	1.02	56.9	0
0	Stromal cells	NK	NK	C12orf75	1.02	61.2	0
0	Stromal cells	NK	NK	LINC01871	1	45.5	0
0	Stromal cells	NK	NK	EVL	0.98	67.5	0
0	Stromal cells	NK	NK	CD3G	0.97	48.1	0
0	Stromal cells	NK	NK	CD2	0.97	54.1	0
0	Stromal cells	NK	NK	S1PR5	0.94	33.7	0
0	Stromal cells	NK	NK	CD8B	0.94	38.5	0
0	Stromal cells	NK	NK	LITAF	0.92	65.8	0
0	Stromal cells	NK	NK	CD52	0.92	91.3	0
0	Stromal cells	NK	NK	CD99	0.89	74	0
0	Stromal cells	NK	NK	XCL2	0.89	23.2	0
0	Stromal cells	NK	NK	ITGB2	0.89	74.6	0
0	Stromal cells	NK	NK	IL2RB	0.88	28	0
0	Stromal cells	NK	NK	IFITM2	0.88	78.3	0
0	Stromal cells	NK	NK	KLRG1	0.87	36.1	0
0	Stromal cells	NK	NK	GIMAP7	0.86	45.4	0
0	Stromal cells	NK	NK	IFITM1	0.85	64.6	0
0	Stromal cells	NK	NK	LYAR	0.83	51.5	0
0	Stromal cells	NK	NK	TRGC1	0.83	21.5	0
0	Stromal cells	NK	NK	MYO1F	0.81	52.6	0
0	Stromal cells	NK	NK	PTPRC	0.81	77.2	0
0	Stromal cells	NK	NK	SAMD3	0.81	35.3	0
0	Stromal cells	NK	NK	KLRC1	0.81	14.2	0
0	Stromal cells	NK	NK	MATK	0.81	32.1	0
0	Stromal cells	NK	NK	FCGR3A	0.8	39.3	0
0	Stromal cells	NK	NK	ARL4C	0.79	45.3	0
0	Stromal cells	NK	NK	FCRL6	0.79	29.9	0
0	Stromal cells	NK	NK	ZAP70	0.79	33.3	0
0	Stromal cells	NK	NK	SUN2	0.79	44.3	0
0	Stromal cells	NK	NK	PRKCH	0.78	34.4	0
0	Stromal cells	NK	NK	PRSS23	0.77	24.8	0
0	Stromal cells	NK	NK	LAT	0.77	41.4	0
0	Stromal cells	NK	NK	APOBEC3G	0.76	41.9	0
0	Stromal cells	NK	NK	CLEC2B	0.75	54.5	0
0	Stromal cells	NK	NK	ADGRG1	0.75	24.3	0
0	Stromal cells	NK	NK	PYHIN1	0.75	29.5	0
0	Stromal cells	NK	NK	PPP2R5C	0.74	57.6	0
0	Stromal cells	NK	NK	CALM1	0.74	81.8	0
0	Stromal cells	NK	NK	MT2A	0.74	70.1	0
0	Stromal cells	NK	NK	TMSB4X	0.74	100	0
0	Stromal cells	NK	NK	PFN1	0.73	99	0
0	Stromal cells	NK	NK	BIN2	0.73	52.3	0
0	Stromal cells	NK	NK	RAP1B	0.72	70	0
0	Stromal cells	NK	NK	GNG2	0.72	35.4	0
0	Stromal cells	NK	NK	TBC1D10C	0.72	46.3	0
0	Stromal cells	NK	NK	CLEC2D	0.71	46.5	0
0	Stromal cells	NK	NK	CCL4L2	0.69	13.5	0
0	Stromal cells	NK	NK	GZMK	0.69	30.3	0
0	Stromal cells	NK	NK	APMAP	0.68	36.7	0
0	Stromal cells	NK	NK	CCND3	0.68	45.5	0
0	Stromal cells	NK	NK	FYN	0.68	35	0
0	Stromal cells	NK	NK	PIP4K2A	0.68	38.8	0
0	Stromal cells	NK	NK	HLA-A	0.68	99.8	0
0	Stromal cells	NK	NK	AES	0.68	57	0
0	Stromal cells	NK	NK	ARHGDIB	0.68	90.2	0
0	Stromal cells	NK	NK	SEPT7	0.67	65.3	0
0	Stromal cells	NK	NK	MBP	0.67	33.7	0
0	Stromal cells	NK	NK	KLRC2	0.67	12.8	0
0	Stromal cells	NK	NK	IRF1	0.67	53.2	0
0	Stromal cells	NK	NK	ITGB1	0.67	44.2	0
0	Stromal cells	NK	NK	MYL12A	0.67	94.2	0
0	Stromal cells	NK	NK	DOK2	0.67	37.2	0
0	Stromal cells	NK	NK	PIK3R1	0.66	34.2	0
0	Stromal cells	NK	NK	RAC2	0.66	63.9	0
0	Stromal cells	NK	NK	EFHD2	0.66	43.2	0
0	Stromal cells	NK	NK	PAXX	0.66	48.6	0
0	Stromal cells	NK	NK	IFNG	0.65	15.7	0
0	Stromal cells	NK	NK	SYTL3	0.65	27.1	0
0	Stromal cells	NK	NK	RORA	0.64	32.6	0
0	Stromal cells	NK	NK	TTC38	0.63	21.8	0
0	Stromal cells	NK	NK	PPP1R18	0.63	37.1	0
0	Stromal cells	NK	NK	DNAJB1	0.63	35.9	0
0	Stromal cells	NK	NK	CD160	0.63	17.9	0
0	Stromal cells	NK	NK	PTPN4	0.63	31.3	0
0	Stromal cells	NK	NK	ETS1	0.62	29.1	0
0	Stromal cells	NK	NK	SH3BGRL3	0.62	97.2	0
0	Stromal cells	NK	NK	SH2D1A	0.62	26.3	0
0	Stromal cells	NK	NK	BIN1	0.61	32.7	0
0	Stromal cells	NK	NK	MYL12B	0.61	81	0
0	Stromal cells	NK	NK	AKNA	0.6	30.2	0
0	Stromal cells	NK	NK	GIMAP4	0.6	35.1	0
0	Stromal cells	NK	NK	SH2D2A	0.6	22.8	0
0	Stromal cells	NK	NK	FLNA	0.6	43.6	0
0	Stromal cells	NK	NK	SYNE2	0.6	29.6	0
0	Stromal cells	NK	NK	GPR65	0.6	31	0
0	Stromal cells	NK	NK	ABHD17A	0.6	29.1	0
0	Stromal cells	NK	NK	C1orf56	0.6	33.6	0
0	Stromal cells	NK	NK	TBX21	0.59	20.5	0
0	Stromal cells	NK	NK	MYO1G	0.59	36.1	0
0	Stromal cells	NK	NK	TPST2	0.58	33.7	0
0	Stromal cells	NK	NK	ACAP1	0.58	38.3	0
0	Stromal cells	NK	NK	TIGIT	0.58	19.9	0
0	Stromal cells	NK	NK	TSEN54	0.58	26.7	0
0	Stromal cells	NK	NK	STAT4	0.58	26.4	0
0	Stromal cells	NK	NK	CORO1A	0.58	83.3	0
0	Stromal cells	NK	NK	NCR3	0.58	18.5	0
0	Stromal cells	NK	NK	ABI3	0.57	26.9	0
0	Stromal cells	NK	NK	FAM49B	0.57	51.9	0
0	Stromal cells	NK	NK	PLEK	0.57	36.6	0
0	Stromal cells	NK	NK	CDC42SE1	0.57	37.9	0
0	Stromal cells	NK	NK	HLA-E	0.57	93.9	0
0	Stromal cells	NK	NK	LIMD2	0.57	63.5	0
0	Stromal cells	NK	NK	LINC00861	0.57	22.8	0
0	Stromal cells	NK	NK	RUNX3	0.57	26.6	0
0	Stromal cells	NK	NK	TNFAIP3	0.56	34	0
0	Stromal cells	NK	NK	CHST12	0.56	38.8	0
0	Stromal cells	NK	NK	RHOF	0.55	31.2	0
0	Stromal cells	NK	NK	ARF6	0.55	65.1	0
0	Stromal cells	NK	NK	LAG3	0.55	20.7	0
0	Stromal cells	NK	NK	WIPF1	0.55	44.3	0
0	Stromal cells	NK	NK	ASCL2	0.54	17.4	0
0	Stromal cells	NK	NK	STK17A	0.54	39.9	0
0	Stromal cells	NK	NK	CTSC	0.54	45.5	0
0	Stromal cells	NK	NK	ARPC2	0.54	85.5	0
0	Stromal cells	NK	NK	PSMB9	0.54	71.2	0
0	Stromal cells	NK	NK	ANXA6	0.54	48.4	0
0	Stromal cells	NK	NK	RNF213	0.53	34.6	0
0	Stromal cells	NK	NK	CEP78	0.53	18.2	0
0	Stromal cells	NK	NK	CREM	0.52	30.4	0
0	Stromal cells	NK	NK	PCSK7	0.52	35.5	0
0	Stromal cells	NK	NK	SKAP1	0.52	25.9	0
0	Stromal cells	NK	NK	ARHGEF1	0.52	35.4	0
0	Stromal cells	NK	NK	C1orf21	0.51	21.9	0
0	Stromal cells	NK	NK	CD96	0.5	22.3	0
0	Stromal cells	NK	NK	RNF125	0.5	22.9	0
0	Stromal cells	NK	NK	LINC02446	0.5	15.4	0
0	Stromal cells	NK	NK	ARL6IP1	0.5	39.7	0
0	Stromal cells	NK	NK	LSP1	0.5	72.7	0
0	Stromal cells	NK	NK	HLA-F	0.5	47.9	0
0	Stromal cells	NK	NK	LBH	0.5	22.7	0
0	Stromal cells	NK	NK	ZFP36L2	0.5	72.3	0
0	Stromal cells	NK	NK	TRG-AS1	0.5	20.2	0
0	Stromal cells	NK	NK	RASAL3	0.49	26.1	0
0	Stromal cells	NK	NK	UCP2	0.49	53.1	0
0	Stromal cells	NK	NK	DNAJB6	0.49	42.4	0
0	Stromal cells	NK	NK	RHOC	0.49	31.9	0
0	Stromal cells	NK	NK	MAP3K8	0.49	31.8	0
0	Stromal cells	NK	NK	PRMT2	0.49	27.5	0
0	Stromal cells	NK	NK	ITGAL	0.48	22.9	0
0	Stromal cells	NK	NK	HLA-B	0.48	99.2	0
0	Stromal cells	NK	NK	RNF166	0.48	28.9	0
0	Stromal cells	NK	NK	SIGIRR	0.48	33	0
0	Stromal cells	NK	NK	ANXA1	0.48	69.2	0
0	Stromal cells	NK	NK	CD300A	0.48	22.6	0
0	Stromal cells	NK	NK	CDC42SE2	0.47	43.9	0
0	Stromal cells	NK	NK	YWHAQ	0.47	47.8	0
0	Stromal cells	NK	NK	ADGRE5	0.47	30.6	0
0	Stromal cells	NK	NK	VAMP2	0.47	74.5	0
0	Stromal cells	NK	NK	ZEB2	0.47	38.1	0
0	Stromal cells	NK	NK	CAPZB	0.47	56	0
0	Stromal cells	NK	NK	AOAH	0.46	22.9	0
0	Stromal cells	NK	NK	JAK1	0.46	35.1	0
0	Stromal cells	NK	NK	PATL2	0.46	17.3	0
0	Stromal cells	NK	NK	PTPN22	0.46	19.7	0
0	Stromal cells	NK	NK	CRIP1	0.46	46.8	0
0	Stromal cells	NK	NK	PTPN7	0.46	27.9	0
0	Stromal cells	NK	NK	RASSF1	0.45	22.7	0
0	Stromal cells	NK	NK	PLEKHF1	0.45	16	0
0	Stromal cells	NK	NK	OPTN	0.45	24.4	0
0	Stromal cells	NK	NK	SEPT1	0.45	34.9	0
0	Stromal cells	NK	NK	ZNF683	0.45	10.7	0
0	Stromal cells	NK	NK	CD6	0.45	19.9	0
0	Stromal cells	NK	NK	ADAM8	0.45	18.9	0
0	Stromal cells	NK	NK	TRAF3IP3	0.44	37.6	0
0	Stromal cells	NK	NK	CEMIP2	0.44	17.7	0
0	Stromal cells	NK	NK	RPS4Y1	0.44	50.4	0
0	Stromal cells	NK	NK	SLC9A3R1	0.44	33.1	0
0	Stromal cells	NK	NK	BHLHE40	0.44	17.5	0
0	Stromal cells	NK	NK	LCP1	0.44	49.1	0
0	Stromal cells	NK	NK	PTGER2	0.44	19.9	0
0	Stromal cells	NK	NK	IL10RA	0.44	29.2	0
0	Stromal cells	NK	NK	STOM	0.44	23.5	0
0	Stromal cells	NK	NK	SIPA1	0.44	21.7	0
0	Stromal cells	NK	NK	OSTF1	0.44	38.6	0
0	Stromal cells	NK	NK	TGFBR3	0.43	14.4	0
0	Stromal cells	NK	NK	DGKZ	0.43	21.8	0
0	Stromal cells	NK	NK	ACTB	0.43	99.9	0
0	Stromal cells	NK	NK	SPOCK2	0.43	22	0
0	Stromal cells	NK	NK	ARHGAP9	0.43	24.3	0
0	Stromal cells	NK	NK	ARPC4	0.43	47.6	0
0	Stromal cells	NK	NK	CXCR4	0.43	76.7	0
0	Stromal cells	NK	NK	SSBP4	0.43	28.2	0
0	Stromal cells	NK	NK	PSME1	0.42	80.8	0
0	Stromal cells	NK	NK	IL2RG	0.42	63.1	0
0	Stromal cells	NK	NK	TC2N	0.42	17.7	0
0	Stromal cells	NK	NK	DENND2D	0.42	16.6	0
0	Stromal cells	NK	NK	GTF3C1	0.41	13.5	0
0	Stromal cells	NK	NK	CFL1	0.41	95.7	0
0	Stromal cells	NK	NK	LINC00623	0.41	25.7	0
0	Stromal cells	NK	NK	IDI1	0.41	28.1	0
0	Stromal cells	NK	NK	SCP2	0.41	45.1	0
0	Stromal cells	NK	NK	ARHGAP45	0.41	28.3	0
0	Stromal cells	NK	NK	CIB1	0.41	48.7	0
0	Stromal cells	NK	NK	S1PR4	0.41	29.1	0
0	Stromal cells	NK	NK	ADRB2	0.41	16.4	0
0	Stromal cells	NK	NK	CAP1	0.41	51.8	0
0	Stromal cells	NK	NK	PPP1CA	0.41	62.6	0
0	Stromal cells	NK	NK	ANKRD44	0.4	28.1	0
0	Stromal cells	NK	NK	RPS27	0.4	100	0
0	Stromal cells	NK	NK	TGFB1	0.4	35.8	0
0	Stromal cells	NK	NK	SPN	0.4	26.1	0
0	Stromal cells	NK	NK	CDC25B	0.4	19.6	0
0	Stromal cells	NK	NK	SYNE1	0.4	18.3	0
0	Stromal cells	NK	NK	RPS29	0.4	99.6	0
0	Stromal cells	NK	NK	ARL6IP5	0.4	55	0
0	Stromal cells	NK	NK	FNBP1	0.4	30.3	0
0	Stromal cells	NK	NK	RIPOR2	0.4	29.7	0
0	Stromal cells	NK	NK	RAB29	0.4	17.1	0
0	Stromal cells	NK	NK	BTG1	0.4	86.6	0
0	Stromal cells	NK	NK	GRAP2	0.39	15.3	0
0	Stromal cells	NK	NK	PTGDR	0.39	12.2	0
0	Stromal cells	NK	NK	TSPAN32	0.39	16	0
0	Stromal cells	NK	NK	BTN3A2	0.39	23	0
0	Stromal cells	NK	NK	IER2	0.39	77.6	0
0	Stromal cells	NK	NK	MGAT4A	0.39	19.6	0
0	Stromal cells	NK	NK	SRSF5	0.39	71.2	0
0	Stromal cells	NK	NK	UBB	0.38	94.5	0
0	Stromal cells	NK	NK	FGR	0.38	28.7	0
0	Stromal cells	NK	NK	COMMD6	0.38	74.3	0
0	Stromal cells	NK	NK	MSN	0.38	38	0
0	Stromal cells	NK	NK	SERTAD1	0.38	18.2	0
0	Stromal cells	NK	NK	STK10	0.38	20.3	0
0	Stromal cells	NK	NK	CYFIP2	0.38	17.5	0
0	Stromal cells	NK	NK	STK4	0.38	41.4	0
0	Stromal cells	NK	NK	ACTR3	0.37	46.8	0
0	Stromal cells	NK	NK	NFATC3	0.37	19.6	0
0	Stromal cells	NK	NK	P2RY8	0.37	20.5	0
0	Stromal cells	NK	NK	AAK1	0.37	20.2	0
0	Stromal cells	NK	NK	AC114760.2	0.37	30.2	0
0	Stromal cells	NK	NK	EOMES	0.37	11.8	0
0	Stromal cells	NK	NK	LPCAT1	0.37	16.1	0
0	Stromal cells	NK	NK	CBLB	0.37	14.9	0
0	Stromal cells	NK	NK	PARP8	0.36	20	0
0	Stromal cells	NK	NK	PDLIM2	0.36	20.2	0
0	Stromal cells	NK	NK	CMTM3	0.36	17.5	0
0	Stromal cells	NK	NK	ANXA2R	0.36	18.1	0
0	Stromal cells	NK	NK	CD244	0.36	11.9	0
0	Stromal cells	NK	NK	PITPNC1	0.36	15.4	0
0	Stromal cells	NK	NK	RPS6KA1	0.36	16.5	0
0	Stromal cells	NK	NK	SEPT9	0.36	29.5	0
0	Stromal cells	NK	NK	FUS	0.35	49.5	0
0	Stromal cells	NK	NK	EHD1	0.35	19.2	0
0	Stromal cells	NK	NK	DDX5	0.35	89.7	0
0	Stromal cells	NK	NK	SRSF7	0.35	56.2	0
0	Stromal cells	NK	NK	CDC42	0.35	68.3	0
0	Stromal cells	NK	NK	PXN	0.35	14.2	0
0	Stromal cells	NK	NK	MYLIP	0.35	19.9	0
0	Stromal cells	NK	NK	CX3CR1	0.35	11.8	0
0	Stromal cells	NK	NK	FYB1	0.35	40.9	0
0	Stromal cells	NK	NK	FAM107B	0.34	24.8	0
0	Stromal cells	NK	NK	ADD3	0.34	23.8	0
0	Stromal cells	NK	NK	BATF	0.34	13	0
0	Stromal cells	NK	NK	GPSM3	0.34	55.1	0
0	Stromal cells	NK	NK	MT1E	0.34	13.4	0
0	Stromal cells	NK	NK	ARPC1B	0.34	65.2	0
0	Stromal cells	NK	NK	F2R	0.34	12.8	0
0	Stromal cells	NK	NK	LINC02084	0.34	11.3	0
0	Stromal cells	NK	NK	CYTH1	0.34	21.4	0
0	Stromal cells	NK	NK	JAKMIP1	0.34	12.1	0
0	Stromal cells	NK	NK	RPS26	0.34	90.8	0
0	Stromal cells	NK	NK	CDKN2D	0.33	22.7	0
0	Stromal cells	NK	NK	IL12RB1	0.33	14.7	0
0	Stromal cells	NK	NK	SLFN5	0.33	14	0
0	Stromal cells	NK	NK	MT1F	0.33	14.8	0
0	Stromal cells	NK	NK	SLA2	0.32	11.3	0
0	Stromal cells	NK	NK	RAB37	0.32	12.6	0
0	Stromal cells	NK	NK	PRR5	0.32	12.4	0
0	Stromal cells	NK	NK	ARHGAP15	0.32	24.7	0
0	Stromal cells	NK	NK	SH3BP1	0.32	16.6	0
0	Stromal cells	NK	NK	N4BP2L2	0.32	52.3	0
0	Stromal cells	NK	NK	HSP90AA1	0.32	71.8	0
0	Stromal cells	NK	NK	HNRNPDL	0.32	71	0
0	Stromal cells	NK	NK	MT1X	0.31	24.1	0
0	Stromal cells	NK	NK	LY6E	0.31	70.7	0
0	Stromal cells	NK	NK	GATA3	0.31	12.5	0
0	Stromal cells	NK	NK	PRKACB	0.31	15.9	0
0	Stromal cells	NK	NK	ZNF276	0.31	14	0
0	Stromal cells	NK	NK	INPP5D	0.31	17.3	0
0	Stromal cells	NK	NK	BCL11B	0.3	13.2	0
0	Stromal cells	NK	NK	PPDPF	0.3	81.5	0
0	Stromal cells	NK	NK	NLRC5	0.3	13.7	0
0	Stromal cells	NK	NK	SERPINB9	0.3	15.9	0
0	Stromal cells	NK	NK	SORL1	0.3	15.6	0
0	Stromal cells	NK	NK	ATG2A	0.3	14.1	0
0	Stromal cells	NK	NK	YWHAZ	0.3	55.9	0
0	Stromal cells	NK	NK	ATP8A1	0.29	12	0
0	Stromal cells	NK	NK	TAGLN2	0.29	53.2	0
0	Stromal cells	NK	NK	APBB1IP	0.29	18.5	0
0	Stromal cells	NK	NK	ITK	0.29	11.7	0
0	Stromal cells	NK	NK	PSTPIP1	0.29	15.6	0
0	Stromal cells	NK	NK	RASGRP1	0.29	12.5	0
0	Stromal cells	NK	NK	SLA	0.29	15.5	0
0	Stromal cells	NK	NK	RASGRP2	0.28	21.2	0
0	Stromal cells	NK	NK	AC004865.2	0.28	10.4	0
0	Stromal cells	NK	NK	ARAP2	0.28	12.8	0
0	Stromal cells	NK	NK	ARHGEF3	0.28	13.1	0
0	Stromal cells	NK	NK	GBP2	0.28	19.8	0
0	Stromal cells	NK	NK	CCSER2	0.28	13.4	0
0	Stromal cells	NK	NK	GBP5	0.28	14.4	0
0	Stromal cells	NK	NK	RPS15A	0.28	99.9	0
0	Stromal cells	NK	NK	TMSB10	0.28	100	0
0	Stromal cells	NK	NK	GMFG	0.27	76.1	0
0	Stromal cells	NK	NK	GK5	0.27	10.2	0
0	Stromal cells	NK	NK	DEK	0.27	26.7	0
0	Stromal cells	NK	NK	CD81	0.27	12.9	0
0	Stromal cells	NK	NK	SKP1	0.27	69	0
0	Stromal cells	NK	NK	GPR171	0.27	11.2	0
0	Stromal cells	NK	NK	PDE4D	0.27	12.5	0
0	Stromal cells	NK	NK	METRNL	0.26	12.5	0
0	Stromal cells	NK	NK	GIMAP1	0.26	11.8	0
0	Stromal cells	NK	NK	RGL4	0.26	10.6	0
0	Stromal cells	NK	NK	MYL6	0.25	94.8	0
0	Stromal cells	NK	NK	C11orf21	0.25	11.1	0
0	Stromal cells	NK	NK	CYSTM1	-0.25	3	0
0	Stromal cells	NK	NK	MRPL24	-0.25	8.4	0
0	Stromal cells	NK	NK	ATP5F1A	-0.25	35.1	0
0	Stromal cells	NK	NK	TSTD1	-0.25	32.8	0
0	Stromal cells	NK	NK	CLIC4	-0.25	0.2	0
0	Stromal cells	NK	NK	RAB1A	-0.25	14.7	0
0	Stromal cells	NK	NK	LAMTOR2	-0.25	22.5	0
0	Stromal cells	NK	NK	TOP1	-0.25	9.7	0
0	Stromal cells	NK	NK	IMPDH2	-0.25	6.5	0
0	Stromal cells	NK	NK	PAICS	-0.25	2	0
0	Stromal cells	NK	NK	GLRX	-0.25	22.3	0
0	Stromal cells	NK	NK	COX7A2	-0.25	70.3	0
0	Stromal cells	NK	NK	NDUFV2	-0.25	23.7	0
0	Stromal cells	NK	NK	AP2S1	-0.25	28.2	0
0	Stromal cells	NK	NK	RPS13	-0.25	97.8	0
0	Stromal cells	NK	NK	NDUFC1	-0.26	18.6	0
0	Stromal cells	NK	NK	SMCO4	-0.26	1.8	0
0	Stromal cells	NK	NK	TMED3	-0.26	9.9	0
0	Stromal cells	NK	NK	RBM47	-0.26	0.3	0
0	Stromal cells	NK	NK	IRF4	-0.26	1.8	0
0	Stromal cells	NK	NK	UBE2E2	-0.26	0.3	0
0	Stromal cells	NK	NK	DNAJB11	-0.26	12.1	0
0	Stromal cells	NK	NK	ATG3	-0.26	11.8	0
0	Stromal cells	NK	NK	EMC4	-0.26	20.2	0
0	Stromal cells	NK	NK	AGA	-0.26	5.8	0
0	Stromal cells	NK	NK	TMEM9	-0.26	2.8	0
0	Stromal cells	NK	NK	CNPY3	-0.26	17.2	0
0	Stromal cells	NK	NK	CRACR2B	-0.26	0.8	0
0	Stromal cells	NK	NK	SELENOH	-0.26	30.4	0
0	Stromal cells	NK	NK	C12orf45	-0.26	4.7	0
0	Stromal cells	NK	NK	EVI2A	-0.26	15.6	0
0	Stromal cells	NK	NK	SLAMF7	-0.26	13.1	0
0	Stromal cells	NK	NK	ALG2	-0.26	3.4	0
0	Stromal cells	NK	NK	RPS9	-0.26	98.2	0
0	Stromal cells	NK	NK	HSD17B12	-0.26	3.6	0
0	Stromal cells	NK	NK	SAR1B	-0.26	9.2	0
0	Stromal cells	NK	NK	NME4	-0.26	4.2	0
0	Stromal cells	NK	NK	RPS8	-0.26	98.9	0
0	Stromal cells	NK	NK	LYL1	-0.26	0.9	0
0	Stromal cells	NK	NK	AIM2	-0.26	0.6	0
0	Stromal cells	NK	NK	SCARB2	-0.26	2.7	0
0	Stromal cells	NK	NK	PRELID1	-0.26	45.2	0
0	Stromal cells	NK	NK	BMI1	-0.26	4.7	0
0	Stromal cells	NK	NK	SURF1	-0.26	15.1	0
0	Stromal cells	NK	NK	PAIP2B	-0.26	0.7	0
0	Stromal cells	NK	NK	ERP44	-0.26	19.8	0
0	Stromal cells	NK	NK	EPRS	-0.26	7.3	0
0	Stromal cells	NK	NK	ECI1	-0.26	3.1	0
0	Stromal cells	NK	NK	HINT2	-0.26	15.7	0
0	Stromal cells	NK	NK	NHP2	-0.26	20.9	0
0	Stromal cells	NK	NK	OS9	-0.26	18.9	0
0	Stromal cells	NK	NK	BEX3	-0.26	1.1	0
0	Stromal cells	NK	NK	ANP32B	-0.26	26.1	0
0	Stromal cells	NK	NK	PARP1	-0.26	15.6	0
0	Stromal cells	NK	NK	SULT1A1	-0.27	1.8	0
0	Stromal cells	NK	NK	CKS1B	-0.27	5.4	0
0	Stromal cells	NK	NK	ATF5	-0.27	2.3	0
0	Stromal cells	NK	NK	RHEB	-0.27	20.5	0
0	Stromal cells	NK	NK	STXBP2	-0.27	19.5	0
0	Stromal cells	NK	NK	LSAMP	-0.27	0.1	0
0	Stromal cells	NK	NK	MLLT3	-0.27	5.5	0
0	Stromal cells	NK	NK	FXYD5	-0.27	60.6	0
0	Stromal cells	NK	NK	SNRPE	-0.27	32	0
0	Stromal cells	NK	NK	SQSTM1	-0.27	25	0
0	Stromal cells	NK	NK	RAB31	-0.27	0.6	0
0	Stromal cells	NK	NK	NAP1L1	-0.27	41.3	0
0	Stromal cells	NK	NK	ADA2	-0.27	5.2	0
0	Stromal cells	NK	NK	YIPF3	-0.27	10.3	0
0	Stromal cells	NK	NK	BSG	-0.27	41.8	0
0	Stromal cells	NK	NK	NDUFA4	-0.27	65.8	0
0	Stromal cells	NK	NK	MRPL40	-0.27	10.5	0
0	Stromal cells	NK	NK	NOP10	-0.27	38	0
0	Stromal cells	NK	NK	MRPL51	-0.27	19.8	0
0	Stromal cells	NK	NK	STT3A	-0.27	3.2	0
0	Stromal cells	NK	NK	HLA-DMB	-0.27	6.7	0
0	Stromal cells	NK	NK	C19orf70	-0.28	26.9	0
0	Stromal cells	NK	NK	YIPF2	-0.28	4.7	0
0	Stromal cells	NK	NK	ANKRD37	-0.28	2.8	0
0	Stromal cells	NK	NK	ALG3	-0.28	6.3	0
0	Stromal cells	NK	NK	TMEM243	-0.28	13.7	0
0	Stromal cells	NK	NK	NUP214	-0.28	3.9	0
0	Stromal cells	NK	NK	CITED2	-0.28	23	0
0	Stromal cells	NK	NK	IDUA	-0.28	1.1	0
0	Stromal cells	NK	NK	ODF3B	-0.28	3.4	0
0	Stromal cells	NK	NK	PERP	-0.28	3.1	0
0	Stromal cells	NK	NK	C19orf24	-0.28	20.6	0
0	Stromal cells	NK	NK	BTK	-0.28	0.3	0
0	Stromal cells	NK	NK	RAB30	-0.28	0.8	0
0	Stromal cells	NK	NK	DNAJC10	-0.28	4.9	0
0	Stromal cells	NK	NK	ALOX5	-0.28	0.5	0
0	Stromal cells	NK	NK	HIST1H2BD	-0.28	3.8	0
0	Stromal cells	NK	NK	TECR	-0.28	27.7	0
0	Stromal cells	NK	NK	MT-ND4	-0.28	97.7	0
0	Stromal cells	NK	NK	MRPL23	-0.28	15.5	0
0	Stromal cells	NK	NK	LRRC59	-0.28	7.2	0
0	Stromal cells	NK	NK	ANAPC11	-0.28	29.1	0
0	Stromal cells	NK	NK	PRKCSH	-0.28	15	0
0	Stromal cells	NK	NK	FAM96A	-0.28	12.8	0
0	Stromal cells	NK	NK	RPL4	-0.28	88.3	0
0	Stromal cells	NK	NK	TMBIM4	-0.29	32.1	0
0	Stromal cells	NK	NK	MX1	-0.29	8.2	0
0	Stromal cells	NK	NK	PRDX3	-0.29	9.3	0
0	Stromal cells	NK	NK	NDUFB5	-0.29	17.1	0
0	Stromal cells	NK	NK	SYPL1	-0.29	5.9	0
0	Stromal cells	NK	NK	NDUFS6	-0.29	30.9	0
0	Stromal cells	NK	NK	UBE2E1	-0.29	7.3	0
0	Stromal cells	NK	NK	PDCD5	-0.29	16.8	0
0	Stromal cells	NK	NK	ICAM3	-0.29	43.5	0
0	Stromal cells	NK	NK	SCAMP5	-0.29	0.1	0
0	Stromal cells	NK	NK	RPL18A	-0.29	99.6	0
0	Stromal cells	NK	NK	MTHFD2	-0.29	8.7	0
0	Stromal cells	NK	NK	GLUL	-0.29	13.3	0
0	Stromal cells	NK	NK	DUSP1	-0.29	54.4	0
0	Stromal cells	NK	NK	CRNDE	-0.29	0.3	0
0	Stromal cells	NK	NK	C1orf43	-0.29	13.1	0
0	Stromal cells	NK	NK	LAP3	-0.29	9.3	0
0	Stromal cells	NK	NK	PPP1R14B	-0.29	1.5	0
0	Stromal cells	NK	NK	LINC00467	-0.29	1	0
0	Stromal cells	NK	NK	PRDX5	-0.29	37.6	0
0	Stromal cells	NK	NK	RPL18	-0.29	97.3	0
0	Stromal cells	NK	NK	MIF	-0.29	52.5	0
0	Stromal cells	NK	NK	SELENOT	-0.29	42.5	0
0	Stromal cells	NK	NK	QTRT1	-0.29	6.4	0
0	Stromal cells	NK	NK	GARS	-0.3	5.5	0
0	Stromal cells	NK	NK	DUSP4	-0.3	3.4	0
0	Stromal cells	NK	NK	BST2	-0.3	37.1	0
0	Stromal cells	NK	NK	CD180	-0.3	0.1	0
0	Stromal cells	NK	NK	LAPTM4A	-0.3	29.2	0
0	Stromal cells	NK	NK	PRDX2	-0.3	27.4	0
0	Stromal cells	NK	NK	STRBP	-0.3	1.1	0
0	Stromal cells	NK	NK	FAM133A	-0.3	0.1	0
0	Stromal cells	NK	NK	SOD2	-0.3	5.9	0
0	Stromal cells	NK	NK	YBX3	-0.3	7.7	0
0	Stromal cells	NK	NK	BUD23	-0.3	18.1	0
0	Stromal cells	NK	NK	PCLAF	-0.3	3.1	0
0	Stromal cells	NK	NK	SGK1	-0.3	1.2	0
0	Stromal cells	NK	NK	CXorf21	-0.3	0.5	0
0	Stromal cells	NK	NK	PPT1	-0.3	9.4	0
0	Stromal cells	NK	NK	INSR	-0.31	0.3	0
0	Stromal cells	NK	NK	ATP2B1-AS1	-0.31	7	0
0	Stromal cells	NK	NK	SND1	-0.31	7.8	0
0	Stromal cells	NK	NK	NDUFA11	-0.31	44.3	0
0	Stromal cells	NK	NK	ALDH2	-0.31	1	0
0	Stromal cells	NK	NK	PPA1	-0.31	19.1	0
0	Stromal cells	NK	NK	ANXA2	-0.31	39	0
0	Stromal cells	NK	NK	DUSP6	-0.31	2.7	0
0	Stromal cells	NK	NK	TP53INP1	-0.31	1.8	0
0	Stromal cells	NK	NK	HIST2H2BE	-0.31	12.5	0
0	Stromal cells	NK	NK	SNHG8	-0.31	24.8	0
0	Stromal cells	NK	NK	MCRIP2	-0.31	3.1	0
0	Stromal cells	NK	NK	CNPY2	-0.31	20.9	0
0	Stromal cells	NK	NK	DAD1	-0.31	38.9	0
0	Stromal cells	NK	NK	IFT57	-0.31	4.5	0
0	Stromal cells	NK	NK	SYVN1	-0.31	2.7	0
0	Stromal cells	NK	NK	SRPRA	-0.31	10.9	0
0	Stromal cells	NK	NK	MGAT1	-0.32	11.6	0
0	Stromal cells	NK	NK	RTN3	-0.32	10.8	0
0	Stromal cells	NK	NK	GNL3	-0.32	7.7	0
0	Stromal cells	NK	NK	NCF2	-0.32	0.8	0
0	Stromal cells	NK	NK	GRINA	-0.32	3.9	0
0	Stromal cells	NK	NK	YIF1A	-0.32	9.3	0
0	Stromal cells	NK	NK	PRCP	-0.32	5.1	0
0	Stromal cells	NK	NK	LSM5	-0.32	22.9	0
0	Stromal cells	NK	NK	MT-ND2	-0.32	94.6	0
0	Stromal cells	NK	NK	PGD	-0.32	4	0
0	Stromal cells	NK	NK	SH2B2	-0.32	0.2	0
0	Stromal cells	NK	NK	TIMM13	-0.32	15.8	0
0	Stromal cells	NK	NK	ADIPOR1	-0.32	9	0
0	Stromal cells	NK	NK	MORF4L2	-0.32	12.1	0
0	Stromal cells	NK	NK	NDUFB4	-0.32	37.6	0
0	Stromal cells	NK	NK	CCDC88A	-0.32	3.3	0
0	Stromal cells	NK	NK	ERGIC2	-0.32	9.7	0
0	Stromal cells	NK	NK	FCRL2	-0.32	0.4	0
0	Stromal cells	NK	NK	CD302	-0.33	0.8	0
0	Stromal cells	NK	NK	ST6GALNAC4	-0.33	2.1	0
0	Stromal cells	NK	NK	PMVK	-0.33	8.8	0
0	Stromal cells	NK	NK	NDUFB11	-0.33	43.3	0
0	Stromal cells	NK	NK	CPEB4	-0.33	3.3	0
0	Stromal cells	NK	NK	GPR183	-0.33	5.6	0
0	Stromal cells	NK	NK	CDV3	-0.33	12.1	0
0	Stromal cells	NK	NK	DST	-0.33	0.5	0
0	Stromal cells	NK	NK	ATP5F1D	-0.33	49.7	0
0	Stromal cells	NK	NK	PDK1	-0.33	2.2	0
0	Stromal cells	NK	NK	NDUFAF3	-0.33	19.6	0
0	Stromal cells	NK	NK	SEL1L	-0.33	5	0
0	Stromal cells	NK	NK	BCL11A	-0.33	0.4	0
0	Stromal cells	NK	NK	BIRC3	-0.33	6.7	0
0	Stromal cells	NK	NK	CD86	-0.33	0.8	0
0	Stromal cells	NK	NK	C19orf38	-0.33	0.9	0
0	Stromal cells	NK	NK	EIF2S2	-0.33	20.1	0
0	Stromal cells	NK	NK	RPL29	-0.33	96.5	0
0	Stromal cells	NK	NK	IFNAR1	-0.33	4.9	0
0	Stromal cells	NK	NK	RNGTT	-0.33	3.2	0
0	Stromal cells	NK	NK	ATP5PF	-0.33	42.2	0
0	Stromal cells	NK	NK	APP	-0.33	0.5	0
0	Stromal cells	NK	NK	PILRA	-0.33	0.8	0
0	Stromal cells	NK	NK	FAM174A	-0.34	2.6	0
0	Stromal cells	NK	NK	RALGPS2	-0.34	0.3	0
0	Stromal cells	NK	NK	PECAM1	-0.34	7.3	0
0	Stromal cells	NK	NK	AKR1A1	-0.34	10.7	0
0	Stromal cells	NK	NK	EIF4EBP1	-0.34	5.6	0
0	Stromal cells	NK	NK	AC012236.1	-0.34	0.2	0
0	Stromal cells	NK	NK	HSBP1	-0.34	12.8	0
0	Stromal cells	NK	NK	RPL7A	-0.34	92.9	0
0	Stromal cells	NK	NK	TSC22D3	-0.34	57.9	0
0	Stromal cells	NK	NK	ANXA5	-0.34	22.1	0
0	Stromal cells	NK	NK	CLECL1	-0.34	1.6	0
0	Stromal cells	NK	NK	CALU	-0.34	3.9	0
0	Stromal cells	NK	NK	SLC7A7	-0.34	0.9	0
0	Stromal cells	NK	NK	NCF4	-0.34	2	0
0	Stromal cells	NK	NK	ALG5	-0.34	12.1	0
0	Stromal cells	NK	NK	CREG1	-0.34	1.9	0
0	Stromal cells	NK	NK	TRMT112	-0.34	47.4	0
0	Stromal cells	NK	NK	CYSLTR1	-0.34	1.8	0
0	Stromal cells	NK	NK	KLF13	-0.35	12.5	0
0	Stromal cells	NK	NK	CREB3L2	-0.35	5.3	0
0	Stromal cells	NK	NK	HSPD1	-0.35	14.3	0
0	Stromal cells	NK	NK	H3F3A	-0.35	87.2	0
0	Stromal cells	NK	NK	TIMP2	-0.35	0.5	0
0	Stromal cells	NK	NK	CCDC50	-0.35	2.3	0
0	Stromal cells	NK	NK	GNAS	-0.35	28.2	0
0	Stromal cells	NK	NK	VKORC1	-0.35	11.7	0
0	Stromal cells	NK	NK	HCK	-0.35	0.9	0
0	Stromal cells	NK	NK	IFNAR2	-0.35	7.6	0
0	Stromal cells	NK	NK	TBXAS1	-0.35	3.8	0
0	Stromal cells	NK	NK	SEL1L3	-0.35	5.1	0
0	Stromal cells	NK	NK	CSF3R	-0.35	1.1	0
0	Stromal cells	NK	NK	C5AR1	-0.35	1	0
0	Stromal cells	NK	NK	SELENOP	-0.35	0.2	0
0	Stromal cells	NK	NK	PNOC	-0.35	0.2	0
0	Stromal cells	NK	NK	LILRA5	-0.35	1.1	0
0	Stromal cells	NK	NK	ELL2	-0.35	1.2	0
0	Stromal cells	NK	NK	P2RX1	-0.35	0.3	0
0	Stromal cells	NK	NK	SEMA4A	-0.35	1.2	0
0	Stromal cells	NK	NK	PYCR1	-0.35	0.3	0
0	Stromal cells	NK	NK	TMCO1	-0.35	25.8	0
0	Stromal cells	NK	NK	PELI1	-0.36	2.2	0
0	Stromal cells	NK	NK	CYBA	-0.36	95.7	0
0	Stromal cells	NK	NK	SVIP	-0.36	13	0
0	Stromal cells	NK	NK	UQCRQ	-0.36	50.8	0
0	Stromal cells	NK	NK	ZNF593	-0.36	8.1	0
0	Stromal cells	NK	NK	CLEC12A	-0.36	1.6	0
0	Stromal cells	NK	NK	SLC25A5	-0.36	35.3	0
0	Stromal cells	NK	NK	SLC35B1	-0.36	8.8	0
0	Stromal cells	NK	NK	PDXK	-0.36	5.3	0
0	Stromal cells	NK	NK	LGALS3	-0.36	7.6	0
0	Stromal cells	NK	NK	JTB	-0.36	45.5	0
0	Stromal cells	NK	NK	SSR1	-0.36	18.8	0
0	Stromal cells	NK	NK	DPP7	-0.36	27	0
0	Stromal cells	NK	NK	FAM3C	-0.36	7.5	0
0	Stromal cells	NK	NK	HLA-DMA	-0.36	19.5	0
0	Stromal cells	NK	NK	GUSB	-0.36	8	0
0	Stromal cells	NK	NK	PSMB5	-0.36	5.3	0
0	Stromal cells	NK	NK	TMEM132D-AS1	-0.36	0.1	0
0	Stromal cells	NK	NK	DERL1	-0.36	15.2	0
0	Stromal cells	NK	NK	TCF4	-0.37	0.9	0
0	Stromal cells	NK	NK	PHPT1	-0.37	23.9	0
0	Stromal cells	NK	NK	TMEM176B	-0.37	0.3	0
0	Stromal cells	NK	NK	JUND	-0.37	21.5	0
0	Stromal cells	NK	NK	ISG20	-0.37	46.2	0
0	Stromal cells	NK	NK	GADD45GIP1	-0.37	25.2	0
0	Stromal cells	NK	NK	BHLHE41	-0.37	0.1	0
0	Stromal cells	NK	NK	IGSF6	-0.37	0.9	0
0	Stromal cells	NK	NK	GPX4	-0.37	35.9	0
0	Stromal cells	NK	NK	UBXN4	-0.37	19.8	0
0	Stromal cells	NK	NK	HEXB	-0.37	8.9	0
0	Stromal cells	NK	NK	FAM30A	-0.38	0.4	0
0	Stromal cells	NK	NK	OTUD1	-0.38	2.2	0
0	Stromal cells	NK	NK	PLD3	-0.38	9.3	0
0	Stromal cells	NK	NK	SULF2	-0.38	2.2	0
0	Stromal cells	NK	NK	CISD2	-0.38	11	0
0	Stromal cells	NK	NK	CUTA	-0.38	45.7	0
0	Stromal cells	NK	NK	TUBB	-0.38	25.1	0
0	Stromal cells	NK	NK	SLC44A1	-0.38	2.2	0
0	Stromal cells	NK	NK	CPNE5	-0.38	0.3	0
0	Stromal cells	NK	NK	SCPEP1	-0.38	4.7	0
0	Stromal cells	NK	NK	MESD	-0.38	14.3	0
0	Stromal cells	NK	NK	YPEL5	-0.38	32.7	0
0	Stromal cells	NK	NK	FBP1	-0.38	1	0
0	Stromal cells	NK	NK	TSPO	-0.39	40.7	0
0	Stromal cells	NK	NK	DUSP22	-0.39	7.3	0
0	Stromal cells	NK	NK	PCDH9	-0.39	0.3	0
0	Stromal cells	NK	NK	JAML	-0.39	3.2	0
0	Stromal cells	NK	NK	LMO4	-0.39	7	0
0	Stromal cells	NK	NK	SSR2	-0.39	56.5	0
0	Stromal cells	NK	NK	EEF2	-0.4	71.7	0
0	Stromal cells	NK	NK	TSPAN3	-0.4	3.8	0
0	Stromal cells	NK	NK	B4GALT3	-0.4	8.1	0
0	Stromal cells	NK	NK	DPEP1	-0.4	0.1	0
0	Stromal cells	NK	NK	ST3GAL6	-0.4	0.3	0
0	Stromal cells	NK	NK	RASGRP3	-0.4	1.1	0
0	Stromal cells	NK	NK	HOMER3	-0.4	0.2	0
0	Stromal cells	NK	NK	UAP1	-0.4	9	0
0	Stromal cells	NK	NK	PEBP1	-0.4	25.5	0
0	Stromal cells	NK	NK	OAZ1	-0.4	85.7	0
0	Stromal cells	NK	NK	EMC7	-0.4	20.1	0
0	Stromal cells	NK	NK	TMEM208	-0.4	13	0
0	Stromal cells	NK	NK	SPATS2	-0.4	2.3	0
0	Stromal cells	NK	NK	RPS27L	-0.4	49.1	0
0	Stromal cells	NK	NK	LGALS1	-0.4	63.9	0
0	Stromal cells	NK	NK	FBXW7	-0.41	6	0
0	Stromal cells	NK	NK	SEC14L1	-0.41	6.5	0
0	Stromal cells	NK	NK	TMED2	-0.41	40.7	0
0	Stromal cells	NK	NK	LAMP2	-0.41	8.8	0
0	Stromal cells	NK	NK	SMIM25	-0.41	1.2	0
0	Stromal cells	NK	NK	CD55	-0.41	10.8	0
0	Stromal cells	NK	NK	METTL7A	-0.41	1.8	0
0	Stromal cells	NK	NK	PHGDH	-0.41	1	0
0	Stromal cells	NK	NK	HDLBP	-0.41	5	0
0	Stromal cells	NK	NK	RNF130	-0.41	3.1	0
0	Stromal cells	NK	NK	LRPAP1	-0.42	20.6	0
0	Stromal cells	NK	NK	CANX	-0.42	19.4	0
0	Stromal cells	NK	NK	SLC25A6	-0.42	70.8	0
0	Stromal cells	NK	NK	ERP29	-0.42	45.7	0
0	Stromal cells	NK	NK	TALDO1	-0.42	21.4	0
0	Stromal cells	NK	NK	WIPI1	-0.42	4.5	0
0	Stromal cells	NK	NK	KCNN3	-0.42	0.2	0
0	Stromal cells	NK	NK	SELENOK	-0.42	43.2	0
0	Stromal cells	NK	NK	EGR1	-0.42	2.4	0
0	Stromal cells	NK	NK	UQCRH	-0.42	49.5	0
0	Stromal cells	NK	NK	DNPH1	-0.43	5.1	0
0	Stromal cells	NK	NK	TSPAN13	-0.43	0.4	0
0	Stromal cells	NK	NK	DPM3	-0.43	11.2	0
0	Stromal cells	NK	NK	ADI1	-0.43	8.1	0
0	Stromal cells	NK	NK	PSAT1	-0.43	1.1	0
0	Stromal cells	NK	NK	AIG1	-0.43	1.6	0
0	Stromal cells	NK	NK	NR4A1	-0.43	1.7	0
0	Stromal cells	NK	NK	LTA4H	-0.44	8.2	0
0	Stromal cells	NK	NK	SUB1	-0.44	80.9	0
0	Stromal cells	NK	NK	MYC	-0.44	2.6	0
0	Stromal cells	NK	NK	CTSB	-0.44	6	0
0	Stromal cells	NK	NK	EEF1B2	-0.44	70.5	0
0	Stromal cells	NK	NK	WARS	-0.44	4.5	0
0	Stromal cells	NK	NK	MPEG1	-0.44	1	0
0	Stromal cells	NK	NK	H2AFZ	-0.44	44.4	0
0	Stromal cells	NK	NK	KDELR2	-0.44	20.3	0
0	Stromal cells	NK	NK	CHPF	-0.45	2.1	0
0	Stromal cells	NK	NK	IFNGR2	-0.45	0.8	0
0	Stromal cells	NK	NK	RASSF6	-0.45	0.1	0
0	Stromal cells	NK	NK	NEB	-0.45	0.2	0
0	Stromal cells	NK	NK	ATP5MC1	-0.45	21.4	0
0	Stromal cells	NK	NK	COX17	-0.45	28.6	0
0	Stromal cells	NK	NK	BASP1	-0.45	0.5	0
0	Stromal cells	NK	NK	CD59	-0.45	5.2	0
0	Stromal cells	NK	NK	LMNA	-0.46	3.5	0
0	Stromal cells	NK	NK	APLP2	-0.46	8.3	0
0	Stromal cells	NK	NK	CD36	-0.46	1.5	0
0	Stromal cells	NK	NK	BRI3	-0.46	7	0
0	Stromal cells	NK	NK	C4orf48	-0.46	16.9	0
0	Stromal cells	NK	NK	RPL8	-0.46	96.3	0
0	Stromal cells	NK	NK	CDKN1A	-0.46	2.6	0
0	Stromal cells	NK	NK	MS4A7	-0.46	1.3	0
0	Stromal cells	NK	NK	COPE	-0.46	48	0
0	Stromal cells	NK	NK	GGH	-0.46	1.3	0
0	Stromal cells	NK	NK	TMEM167A	-0.47	13.8	0
0	Stromal cells	NK	NK	OSTC	-0.47	26.5	0
0	Stromal cells	NK	NK	KLF4	-0.47	0.8	0
0	Stromal cells	NK	NK	CADM1	-0.47	0.9	0
0	Stromal cells	NK	NK	GPR160	-0.47	0.4	0
0	Stromal cells	NK	NK	SEC61G	-0.47	57.2	0
0	Stromal cells	NK	NK	SEC61A1	-0.48	7.9	0
0	Stromal cells	NK	NK	MCL1	-0.48	33	0
0	Stromal cells	NK	NK	TPM4	-0.48	15.6	0
0	Stromal cells	NK	NK	GPRC5D	-0.48	0.1	0
0	Stromal cells	NK	NK	ZBTB38	-0.48	11.8	0
0	Stromal cells	NK	NK	LGALS3BP	-0.49	2.8	0
0	Stromal cells	NK	NK	FGL2	-0.49	3.9	0
0	Stromal cells	NK	NK	BTG2	-0.49	24.5	0
0	Stromal cells	NK	NK	CTSH	-0.49	2.6	0
0	Stromal cells	NK	NK	ARF4	-0.49	19	0
0	Stromal cells	NK	NK	ATRAID	-0.49	25.3	0
0	Stromal cells	NK	NK	CAPG	-0.5	4.2	0
0	Stromal cells	NK	NK	IGF1	-0.5	0.2	0
0	Stromal cells	NK	NK	ALKBH7	-0.5	14.3	0
0	Stromal cells	NK	NK	GCA	-0.5	2.5	0
0	Stromal cells	NK	NK	ATP6V0B	-0.5	30.7	0
0	Stromal cells	NK	NK	AQP3	-0.51	1.8	0
0	Stromal cells	NK	NK	WFDC2	-0.51	0.2	0
0	Stromal cells	NK	NK	ATOX1	-0.51	12.9	0
0	Stromal cells	NK	NK	RPS5	-0.51	93.3	0
0	Stromal cells	NK	NK	NANS	-0.51	6	0
0	Stromal cells	NK	NK	ABCB9	-0.51	0.6	0
0	Stromal cells	NK	NK	STMN1	-0.51	11.3	0
0	Stromal cells	NK	NK	MLEC	-0.51	8.7	0
0	Stromal cells	NK	NK	DNAAF1	-0.51	0.7	0
0	Stromal cells	NK	NK	SLC1A5	-0.51	3.4	0
0	Stromal cells	NK	NK	MGST1	-0.51	0.9	0
0	Stromal cells	NK	NK	UNC93B1	-0.51	2.7	0
0	Stromal cells	NK	NK	MT-ND1	-0.52	80.4	0
0	Stromal cells	NK	NK	HAX1	-0.52	16.6	0
0	Stromal cells	NK	NK	HSPB1	-0.52	16.5	0
0	Stromal cells	NK	NK	SIL1	-0.52	3.9	0
0	Stromal cells	NK	NK	CD9	-0.52	0.8	0
0	Stromal cells	NK	NK	COX5A	-0.52	35.9	0
0	Stromal cells	NK	NK	SPAG4	-0.52	0.4	0
0	Stromal cells	NK	NK	CKAP4	-0.52	0.3	0
0	Stromal cells	NK	NK	ATF4	-0.53	20.7	0
0	Stromal cells	NK	NK	SRM	-0.53	13.7	0
0	Stromal cells	NK	NK	DUSP5	-0.53	9	0
0	Stromal cells	NK	NK	CD38	-0.53	8.7	0
0	Stromal cells	NK	NK	HBD	-0.53	3.4	0
0	Stromal cells	NK	NK	LY86	-0.53	1	0
0	Stromal cells	NK	NK	TKT	-0.54	14	0
0	Stromal cells	NK	NK	SYNGR2	-0.54	11.7	0
0	Stromal cells	NK	NK	CPVL	-0.54	1.2	0
0	Stromal cells	NK	NK	KDELR1	-0.54	9.9	0
0	Stromal cells	NK	NK	SPINT2	-0.54	1	0
0	Stromal cells	NK	NK	TXNDC15	-0.54	5.9	0
0	Stromal cells	NK	NK	DNAJC1	-0.54	16.5	0
0	Stromal cells	NK	NK	PABPC4	-0.55	6.5	0
0	Stromal cells	NK	NK	S100A11	-0.55	50.3	0
0	Stromal cells	NK	NK	TMEM14C	-0.55	5.1	0
0	Stromal cells	NK	NK	TNFRSF13B	-0.55	0.4	0
0	Stromal cells	NK	NK	NENF	-0.55	15.4	0
0	Stromal cells	NK	NK	TMED10	-0.55	23.7	0
0	Stromal cells	NK	NK	RABAC1	-0.55	40.3	0
0	Stromal cells	NK	NK	IFI30	-0.55	1	0
0	Stromal cells	NK	NK	TNFSF13B	-0.55	1.4	0
0	Stromal cells	NK	NK	DDOST	-0.56	20.2	0
0	Stromal cells	NK	NK	DKK1	-0.56	0.2	0
0	Stromal cells	NK	NK	TOR3A	-0.56	6.7	0
0	Stromal cells	NK	NK	TMEM258	-0.56	53.8	0
0	Stromal cells	NK	NK	CD68	-0.56	2.4	0
0	Stromal cells	NK	NK	GAS6	-0.56	0.3	0
0	Stromal cells	NK	NK	NEAT1	-0.56	57.8	0
0	Stromal cells	NK	NK	PHACTR1	-0.56	1.3	0
0	Stromal cells	NK	NK	NSD2	-0.56	1.8	0
0	Stromal cells	NK	NK	FOS	-0.56	35.9	0
0	Stromal cells	NK	NK	LSR	-0.56	0.9	0
0	Stromal cells	NK	NK	RPN1	-0.56	13	0
0	Stromal cells	NK	NK	NME1	-0.57	13.4	0
0	Stromal cells	NK	NK	ASAH1	-0.57	15.4	0
0	Stromal cells	NK	NK	SRPRB	-0.57	6.7	0
0	Stromal cells	NK	NK	CRELD2	-0.57	13.7	0
0	Stromal cells	NK	NK	JSRP1	-0.58	0.6	0
0	Stromal cells	NK	NK	TRAM1	-0.58	32.9	0
0	Stromal cells	NK	NK	ADM	-0.58	0.5	0
0	Stromal cells	NK	NK	ZNF706	-0.59	21.7	0
0	Stromal cells	NK	NK	CYBB	-0.59	1.4	0
0	Stromal cells	NK	NK	PTP4A3	-0.6	1.5	0
0	Stromal cells	NK	NK	FCGR2B	-0.6	0.9	0
0	Stromal cells	NK	NK	POU2F2	-0.6	3.3	0
0	Stromal cells	NK	NK	CD63	-0.6	56.3	0
0	Stromal cells	NK	NK	AC007952.4	-0.61	14.1	0
0	Stromal cells	NK	NK	HIST1H4C	-0.61	11.8	0
0	Stromal cells	NK	NK	CLEC7A	-0.61	2	0
0	Stromal cells	NK	NK	RPLP1	-0.61	99.9	0
0	Stromal cells	NK	NK	HGF	-0.62	0.2	0
0	Stromal cells	NK	NK	YWHAE	-0.62	14.6	0
0	Stromal cells	NK	NK	P4HB	-0.62	34.1	0
0	Stromal cells	NK	NK	CLPTM1L	-0.62	2.8	0
0	Stromal cells	NK	NK	H1FX	-0.62	35	0
0	Stromal cells	NK	NK	FOSB	-0.62	10.9	0
0	Stromal cells	NK	NK	TUBA1B	-0.63	35.4	0
0	Stromal cells	NK	NK	RNASE6	-0.63	1.3	0
0	Stromal cells	NK	NK	CFP	-0.63	1.6	0
0	Stromal cells	NK	NK	LGALS2	-0.63	1.6	0
0	Stromal cells	NK	NK	HSPA5	-0.63	46.8	0
0	Stromal cells	NK	NK	RRBP1	-0.64	7.5	0
0	Stromal cells	NK	NK	CHCHD10	-0.64	17.7	0
0	Stromal cells	NK	NK	SELENOS	-0.64	22.7	0
0	Stromal cells	NK	NK	TMED9	-0.64	31.7	0
0	Stromal cells	NK	NK	KRTCAP2	-0.64	37.8	0
0	Stromal cells	NK	NK	EVI2B	-0.64	26.7	0
0	Stromal cells	NK	NK	CCR10	-0.65	0.3	0
0	Stromal cells	NK	NK	HIST1H2AC	-0.65	8.8	0
0	Stromal cells	NK	NK	FGFR3	-0.65	0.3	0
0	Stromal cells	NK	NK	BLVRB	-0.66	7	0
0	Stromal cells	NK	NK	ERLEC1	-0.66	12	0
0	Stromal cells	NK	NK	CCPG1	-0.66	8.1	0
0	Stromal cells	NK	NK	LMAN1	-0.67	7.9	0
0	Stromal cells	NK	NK	NUCB2	-0.67	20.6	0
0	Stromal cells	NK	NK	IGLL5	-0.67	0.2	0
0	Stromal cells	NK	NK	PLAUR	-0.67	3.2	0
0	Stromal cells	NK	NK	RPLP0	-0.68	87.1	0
0	Stromal cells	NK	NK	FCGRT	-0.68	5.3	0
0	Stromal cells	NK	NK	MDK	-0.69	0.7	0
0	Stromal cells	NK	NK	HM13	-0.69	14.5	0
0	Stromal cells	NK	NK	MARCKS	-0.69	0.7	0
0	Stromal cells	NK	NK	NAMPT	-0.7	8.1	0
0	Stromal cells	NK	NK	CTSZ	-0.7	3.1	0
0	Stromal cells	NK	NK	TXN	-0.7	42.4	0
0	Stromal cells	NK	NK	SAT1	-0.71	45.2	0
0	Stromal cells	NK	NK	AP1S2	-0.71	13.6	0
0	Stromal cells	NK	NK	RGS2	-0.71	23.4	0
0	Stromal cells	NK	NK	ERGIC3	-0.71	21.7	0
0	Stromal cells	NK	NK	RHOB	-0.71	5.9	0
0	Stromal cells	NK	NK	LILRB4	-0.71	0.4	0
0	Stromal cells	NK	NK	GSTP1	-0.71	56.2	0
0	Stromal cells	NK	NK	HLA-DOB	-0.72	0.4	0
0	Stromal cells	NK	NK	TPD52	-0.73	7.9	0
0	Stromal cells	NK	NK	GADD45A	-0.73	7.7	0
0	Stromal cells	NK	NK	TXNDC11	-0.74	6.4	0
0	Stromal cells	NK	NK	TMBIM6	-0.74	49.8	0
0	Stromal cells	NK	NK	LMAN2	-0.75	31.3	0
0	Stromal cells	NK	NK	SERP1	-0.75	42	0
0	Stromal cells	NK	NK	CHID1	-0.76	6.5	0
0	Stromal cells	NK	NK	PRDX1	-0.76	23.4	0
0	Stromal cells	NK	NK	TMEM59	-0.76	53	0
0	Stromal cells	NK	NK	SDF2L1	-0.77	24.2	0
0	Stromal cells	NK	NK	AZGP1	-0.77	0.2	0
0	Stromal cells	NK	NK	PDIA4	-0.78	16.7	0
0	Stromal cells	NK	NK	MANF	-0.78	23.7	0
0	Stromal cells	NK	NK	NCF1	-0.8	6.9	0
0	Stromal cells	NK	NK	PLP2	-0.8	12.4	0
0	Stromal cells	NK	NK	MS4A6A	-0.8	2.4	0
0	Stromal cells	NK	NK	CD79B	-0.81	4.3	0
0	Stromal cells	NK	NK	TRIB1	-0.81	0.7	0
0	Stromal cells	NK	NK	DNAJB9	-0.81	15.8	0
0	Stromal cells	NK	NK	SEC62	-0.82	32.1	0
0	Stromal cells	NK	NK	CD74	-0.82	81.9	0
0	Stromal cells	NK	NK	GNG7	-0.82	0.5	0
0	Stromal cells	NK	NK	EDNRB	-0.83	0.4	0
0	Stromal cells	NK	NK	SEC61B	-0.84	49.4	0
0	Stromal cells	NK	NK	CFD	-0.84	3.4	0
0	Stromal cells	NK	NK	FCRL5	-0.84	0.3	0
0	Stromal cells	NK	NK	SPI1	-0.84	2.5	0
0	Stromal cells	NK	NK	FTH1	-0.84	96.7	0
0	Stromal cells	NK	NK	LINC01480	-0.85	0.6	0
0	Stromal cells	NK	NK	TMEM205	-0.85	8.8	0
0	Stromal cells	NK	NK	SELENOM	-0.86	6.8	0
0	Stromal cells	NK	NK	TMEM147	-0.87	16.6	0
0	Stromal cells	NK	NK	SERPINA1	-0.87	3.4	0
0	Stromal cells	NK	NK	PPIB	-0.87	56.8	0
0	Stromal cells	NK	NK	ANKRD28	-0.87	5.4	0
0	Stromal cells	NK	NK	POU2AF1	-0.87	0.5	0
0	Stromal cells	NK	NK	UCHL1	-0.89	0.5	0
0	Stromal cells	NK	NK	G0S2	-0.89	2.1	0
0	Stromal cells	NK	NK	TYMP	-0.9	16.7	0
0	Stromal cells	NK	NK	LY96	-0.9	1.6	0
0	Stromal cells	NK	NK	RNASET2	-0.91	25.1	0
0	Stromal cells	NK	NK	RPN2	-0.92	22.8	0
0	Stromal cells	NK	NK	EAF2	-0.93	1.6	0
0	Stromal cells	NK	NK	COMMD3	-0.93	12.8	0
0	Stromal cells	NK	NK	PLPP5	-0.93	5.5	0
0	Stromal cells	NK	NK	CD14	-0.94	2.5	0
0	Stromal cells	NK	NK	VIM	-0.97	50.3	0
0	Stromal cells	NK	NK	IFI6	-0.98	23.3	0
0	Stromal cells	NK	NK	MEF2C	-0.99	1.2	0
0	Stromal cells	NK	NK	GRN	-1	7.8	0
0	Stromal cells	NK	NK	VCAN	-1	2.7	0
0	Stromal cells	NK	NK	SPCS3	-1	20.2	0
0	Stromal cells	NK	NK	PDIA6	-1.01	28.4	0
0	Stromal cells	NK	NK	AC245014.3	-1.03	15.1	0
0	Stromal cells	NK	NK	SPCS1	-1.04	47	0
0	Stromal cells	NK	NK	FCRLA	-1.07	0.4	0
0	Stromal cells	NK	NK	HLA-DRA	-1.07	47.2	0
0	Stromal cells	NK	NK	CSTA	-1.08	2.9	0
0	Stromal cells	NK	NK	CTSS	-1.08	32.8	0
0	Stromal cells	NK	NK	CTHRC1	-1.09	0.5	0
0	Stromal cells	NK	NK	CD79A	-1.1	0.9	0
0	Stromal cells	NK	NK	UBE2J1	-1.12	13.1	0
0	Stromal cells	NK	NK	PSAP	-1.12	35.7	0
0	Stromal cells	NK	NK	NPC2	-1.13	18.5	0
0	Stromal cells	NK	NK	TIMP1	-1.13	12.8	0
0	Stromal cells	NK	NK	SPCS2	-1.13	47.5	0
0	Stromal cells	NK	NK	LAMP5	-1.14	1	0
0	Stromal cells	NK	NK	PIM2	-1.15	10.9	0
0	Stromal cells	NK	NK	FKBP11	-1.17	29.1	0
0	Stromal cells	NK	NK	MYDGF	-1.19	24.9	0
0	Stromal cells	NK	NK	MTDH	-1.22	32.2	0
0	Stromal cells	NK	NK	FTL	-1.24	97.5	0
0	Stromal cells	NK	NK	SDC1	-1.26	0.5	0
0	Stromal cells	NK	NK	SSR3	-1.26	15.8	0
0	Stromal cells	NK	NK	IFI27	-1.28	2.6	0
0	Stromal cells	NK	NK	QPCT	-1.28	0.8	0
0	Stromal cells	NK	NK	MNDA	-1.3	3.6	0
0	Stromal cells	NK	NK	LST1	-1.31	13.5	0
0	Stromal cells	NK	NK	XBP1	-1.31	39.6	0
0	Stromal cells	NK	NK	AC020656.1	-1.36	7.2	0
0	Stromal cells	NK	NK	FKBP2	-1.37	19.5	0
0	Stromal cells	NK	NK	HERPUD1	-1.41	32.2	0
0	Stromal cells	NK	NK	CCND1	-1.41	0.7	0
0	Stromal cells	NK	NK	AIF1	-1.45	13.8	0
0	Stromal cells	NK	NK	HIST1H1C	-1.45	15.3	0
0	Stromal cells	NK	NK	HSP90B1	-1.53	40.8	0
0	Stromal cells	NK	NK	FCN1	-1.58	9.5	0
0	Stromal cells	NK	NK	SEC11C	-1.6	20.8	0
0	Stromal cells	NK	NK	PRDX4	-1.64	6.9	0
0	Stromal cells	NK	NK	LINC01781	-1.65	0.9	0
0	Stromal cells	NK	NK	S100A12	-1.66	6.9	0
0	Stromal cells	NK	NK	TNFRSF17	-1.87	1.5	0
0	Stromal cells	NK	NK	DERL3	-1.92	2.2	0
0	Stromal cells	NK	NK	FRZB	-1.94	1	0
0	Stromal cells	NK	NK	CST3	-2.09	18.3	0
0	Stromal cells	NK	NK	ITM2C	-2.18	2.9	0
0	Stromal cells	NK	NK	SSR4	-2.22	65.9	0
0	Stromal cells	NK	NK	MZB1	-3.13	9.1	0
0	Stromal cells	NK	NK	TPM3	0.28	52.7	6.95e-303
0	Stromal cells	NK	NK	MFSD10	0.37	22.8	5.09e-302
0	Stromal cells	NK	NK	MIB2	0.38	19.1	7.25e-298
0	Stromal cells	NK	NK	MRPL10	0.37	20	1.76e-297
0	Stromal cells	NK	NK	AREG	-0.38	12.7	2.77e-292
0	Stromal cells	NK	NK	TMC8	0.3	16.6	2.77e-292
0	Stromal cells	NK	NK	ARRB2	0.27	28.8	1.71e-291
0	Stromal cells	NK	NK	AC245297.3	0.38	29.8	1.61e-289
0	Stromal cells	NK	NK	ARHGAP25	0.31	16.2	1.75e-288
0	Stromal cells	NK	NK	CNOT6L	0.3	17.5	3.72e-288
0	Stromal cells	NK	NK	IKZF1	0.34	30.6	8.04e-288
0	Stromal cells	NK	NK	PSMB10	0.37	41.3	1.36e-286
0	Stromal cells	NK	NK	DDX6	0.39	36.3	5.45e-281
0	Stromal cells	NK	NK	CELF2	0.35	33.2	1.65e-280
0	Stromal cells	NK	NK	BZW1	0.38	38.5	2.3e-273
0	Stromal cells	NK	NK	PSMB8	0.33	47	4.01e-272
0	Stromal cells	NK	NK	SYTL1	0.37	27	5.1e-268
0	Stromal cells	NK	NK	CXCL8	-0.95	4.7	3.98e-263
0	Stromal cells	NK	NK	LYZ	-2.38	36.7	6.78e-262
0	Stromal cells	NK	NK	DENND1C	0.26	12.5	3.98e-260
0	Stromal cells	NK	NK	TRIM22	0.28	18.1	8.29e-260
0	Stromal cells	NK	NK	MBNL1	0.34	34.7	2.49e-258
0	Stromal cells	NK	NK	ARHGAP30	0.35	27.4	4.17e-255
0	Stromal cells	NK	NK	MAPK1	0.31	19.2	1.26e-248
0	Stromal cells	NK	NK	BPGM	0.29	11.8	8.72e-248
0	Stromal cells	NK	NK	PRR13	0.27	53.6	5.09e-247
0	Stromal cells	NK	NK	ORAI1	0.28	13.9	1.52e-244
0	Stromal cells	NK	NK	RBM38	0.31	17.6	2.72e-244
0	Stromal cells	NK	NK	PTP4A2	0.3	48.8	8.23e-243
0	Stromal cells	NK	NK	HLA-DRB1	-0.25	60.3	4.41e-242
0	Stromal cells	NK	NK	ZBTB1	0.26	13.2	4.79e-234
0	Stromal cells	NK	NK	UBE2F	0.39	24	1.28e-221
0	Stromal cells	NK	NK	MLLT6	0.26	13.1	3.56e-216
0	Stromal cells	NK	NK	TBCB	0.35	37	9.46e-212
0	Stromal cells	NK	NK	HENMT1	0.25	10.4	3.75e-205
0	Stromal cells	NK	NK	HERPUD2	0.31	19.1	6.56e-200
0	Stromal cells	NK	NK	LYST	0.25	22.5	8.47e-196
0	Stromal cells	NK	NK	CEBPD	-0.26	12.2	1.13e-185
0	Stromal cells	NK	NK	MVD	0.27	11.9	3.3e-184
0	Stromal cells	NK	NK	UBC	-0.3	93.6	4.04e-183
0	Stromal cells	NK	NK	RAB27A	0.3	20.6	3.11e-177
0	Stromal cells	NK	NK	SLC38A1	0.3	20	7.02e-176
0	Stromal cells	NK	NK	PLAC8	0.31	42	1.1e-172
0	Stromal cells	NK	NK	TRAPPC1	0.26	51.8	2.25e-169
0	Stromal cells	NK	NK	IFITM3	-0.53	13.6	3.7e-167
0	Stromal cells	NK	NK	RASSF5	0.32	23.3	1.38e-166
0	Stromal cells	NK	NK	RSRP1	0.34	32.3	8.46e-165
0	Stromal cells	NK	NK	RAP1A	0.29	33.4	1.74e-162
0	Stromal cells	NK	NK	APOBEC3C	0.4	29	1.89e-160
0	Stromal cells	NK	NK	BAX	0.32	41.9	3.81e-156
0	Stromal cells	NK	NK	NR4A2	0.34	30.7	1.36e-155
0	Stromal cells	NK	NK	RPA2	0.33	21.1	3.79e-154
0	Stromal cells	NK	NK	STARD3NL	0.39	18	2.56e-153
0	Stromal cells	NK	NK	MEAF6	0.32	33.5	5.82e-149
0	Stromal cells	NK	NK	KIAA1551	0.26	17.3	1.21e-148
0	Stromal cells	NK	NK	BUB3	0.31	35.7	1.12e-147
0	Stromal cells	NK	NK	SASH3	0.28	16.1	5.95e-147
0	Stromal cells	NK	NK	DCK	0.25	18.5	8.57e-146
0	Stromal cells	NK	NK	MYH9	0.26	22.2	7.27e-141
0	Stromal cells	NK	NK	TSC22D4	0.35	25.5	1.63e-139
0	Stromal cells	NK	NK	OGA	0.31	30.1	6.46e-139
0	Stromal cells	NK	NK	DSTN	0.35	37.6	5.11e-138
0	Stromal cells	NK	NK	CCDC12	0.31	38.1	6.98e-133
0	Stromal cells	NK	NK	TUBA4A	0.38	35.8	1e-128
0	Stromal cells	NK	NK	CMPK1	0.3	38.1	1.12e-126
0	Stromal cells	NK	NK	HBA1	-0.57	19.5	3.46e-123
0	Stromal cells	NK	NK	ACTN4	0.32	20.2	3.56e-122
0	Stromal cells	NK	NK	ARGLU1	0.28	39.4	3.03e-119
0	Stromal cells	NK	NK	COTL1	-0.4	33.2	7.52e-118
0	Stromal cells	NK	NK	ANXA11	0.3	32	1.9e-110
0	Stromal cells	NK	NK	ATM	0.32	24.7	1.19e-109
0	Stromal cells	NK	NK	LEPROTL1	0.26	34.3	2.07e-104
0	Stromal cells	NK	NK	HSPA1A	0.56	12.7	6.42e-104
0	Stromal cells	NK	NK	WDR1	0.32	30.1	1.7e-103
0	Stromal cells	NK	NK	SIRT2	0.28	16.4	3.19e-103
0	Stromal cells	NK	NK	MACF1	0.25	14.4	1.18e-99
0	Stromal cells	NK	NK	HBB	-1.2	35.7	6.26e-99
0	Stromal cells	NK	NK	MCRIP1	0.28	19.7	3.68e-98
0	Stromal cells	NK	NK	SH3KBP1	0.29	26.8	1.26e-93
0	Stromal cells	NK	NK	PTMS	0.29	13.3	2.72e-91
0	Stromal cells	NK	NK	PSMA3-AS1	0.29	27.3	3.42e-90
0	Stromal cells	NK	NK	C9orf78	0.3	34.3	4.13e-90
0	Stromal cells	NK	NK	HMOX2	0.33	22	1.41e-87
0	Stromal cells	NK	NK	APOL6	0.26	16.4	2.62e-85
0	Stromal cells	NK	NK	S100A9	-2.36	45.1	1.78e-81
0	Stromal cells	NK	NK	RNF167	0.33	30.7	2.19e-80
0	Stromal cells	NK	NK	ZC3HAV1	0.26	19.1	1.03e-78
0	Stromal cells	NK	NK	SERTAD3	0.25	12.9	2.69e-75
0	Stromal cells	NK	NK	IKZF3	0.25	15.4	1.38e-74
0	Stromal cells	NK	NK	HDAC1	0.28	22.1	3.39e-73
0	Stromal cells	NK	NK	C19orf66	0.27	19.6	1.27e-72
0	Stromal cells	NK	NK	PRPF38B	0.3	31.2	1.05e-70
0	Stromal cells	NK	NK	CCDC115	0.25	18.1	1.94e-67
0	Stromal cells	NK	NK	FMNL1	0.26	29.5	1.04e-65
0	Stromal cells	NK	NK	CSK	0.26	22.5	1.67e-65
0	Stromal cells	NK	NK	HBA2	-0.6	17.4	3.32e-65
0	Stromal cells	NK	NK	COMMD7	0.28	20.8	1.96e-64
0	Stromal cells	NK	NK	PTPRA	0.25	15.4	1.11e-63
0	Stromal cells	NK	NK	SAMD9	0.25	16.8	6.99e-60
0	Stromal cells	NK	NK	CISD3	0.32	21.9	2.41e-58
0	Stromal cells	NK	NK	GNPTAB	0.26	14.3	4.26e-58
0	Stromal cells	NK	NK	LAMP1	0.28	29.5	1.26e-56
0	Stromal cells	NK	NK	S100A8	-2.51	43.5	5.72e-56
0	Stromal cells	NK	NK	TBCC	0.28	24.5	4.17e-54
0	Stromal cells	NK	NK	ADA	0.27	18.3	3.02e-53
0	Stromal cells	NK	NK	TAOK3	0.26	22.4	2.71e-52
0	Stromal cells	NK	NK	POLR2G	0.28	32.5	7.69e-48
0	Stromal cells	NK	NK	ZNF655	0.25	19.9	3.62e-47
0	Stromal cells	NK	NK	SRPK2	0.26	18.6	1.47e-42
0	Stromal cells	NK	NK	S100A6	-0.41	90.7	6.5e-38
0	Stromal cells	NK	NK	LTB	-0.48	20.9	1.88e-36
0	Stromal cells	NK	NK	MED10	0.26	30	1.41e-34
0	Stromal cells	NK	NK	TCF25	0.27	36.1	1.53e-33
0	Stromal cells	NK	NK	CRBN	0.25	23.8	2.64e-32
0	Stromal cells	NK	NK	PPP1R12A	0.27	22.1	6.53e-32
0	Stromal cells	NK	NK	AC020916.1	0.35	14.6	1.94e-30
0	Stromal cells	NK	NK	SPSB3	0.26	23.2	4.07e-25
0	Stromal cells	NK	NK	CCNH	0.27	22	2.03e-20
0	Stromal cells	NK	NK	M6PR	0.25	26.7	1.39e-13
0	Stromal cells	NK	NK	FCER1G	-0.32	29.8	3.07e-13
0	Stromal cells	NK	NK	EBP	0.26	20.6	1.57e-09
0	Stromal cells	NK	NK	HSPA1B	0.27	11.9	2.3e-08

## Sheet: Table S2
Cluster	Celltype (malignancy)	Celltype (major-lineage)	Celltype (minor-lineage)	Gene	log2FC	Percentage (%)	Adjusted p-value
12	Immune cells	NK	NK	GNLY	4.14	99.2	0
12	Immune cells	NK	NK	NKG7	3.52	100	0
12	Immune cells	NK	NK	GZMB	2.72	96.8	0
12	Immune cells	NK	NK	GZMA	2.68	99.3	0
12	Immune cells	NK	NK	PRF1	2.65	99.2	0
12	Immune cells	NK	NK	FGFBP2	2.64	88.4	0
12	Immune cells	NK	NK	CST7	2.62	99.1	0
12	Immune cells	NK	NK	KLRD1	2.54	98.6	0
12	Immune cells	NK	NK	SPON2	2.44	89	0
12	Immune cells	NK	NK	CLIC3	2.31	90.6	0
12	Immune cells	NK	NK	CCL5	2.29	88.4	0
12	Immune cells	NK	NK	CCL4	2.18	80.8	0
12	Immune cells	NK	NK	KLRF1	2.11	92.7	0
12	Immune cells	NK	NK	CTSW	2.1	98.7	0
12	Immune cells	NK	NK	HOPX	2.03	90.3	0
12	Immune cells	NK	NK	FCGR3A	1.92	88.1	0
12	Immune cells	NK	NK	PTGDS	1.84	23.5	0
12	Immune cells	NK	NK	GZMH	1.77	65.9	0
12	Immune cells	NK	NK	TRDC	1.75	80.3	0
12	Immune cells	NK	NK	KLRB1	1.64	90.5	0
12	Immune cells	NK	NK	IL2RB	1.61	76.9	0
12	Immune cells	NK	NK	CD247	1.6	97.4	0
12	Immune cells	NK	NK	GZMM	1.55	95.7	0
12	Immune cells	NK	NK	EFHD2	1.51	95	0
12	Immune cells	NK	NK	CX3CR1	1.47	76.4	0
12	Immune cells	NK	NK	MATK	1.46	78	0
12	Immune cells	NK	NK	IFITM2	1.45	97.6	0
12	Immune cells	NK	NK	PTGDR	1.44	70.6	0
12	Immune cells	NK	NK	ABHD17A	1.43	94.5	0
12	Immune cells	NK	NK	FCER1G	1.39	96.8	0
12	Immune cells	NK	NK	PYHIN1	1.37	73.1	0
12	Immune cells	NK	NK	HCST	1.37	98	0
12	Immune cells	NK	NK	ADGRG1	1.37	62	0
12	Immune cells	NK	NK	PLEK	1.34	87.4	0
12	Immune cells	NK	NK	XCL2	1.32	50.9	0
12	Immune cells	NK	NK	CD63	1.31	88	0
12	Immune cells	NK	NK	LAIR2	1.31	52.4	0
12	Immune cells	NK	NK	APOBEC3G	1.31	76.2	0
12	Immune cells	NK	NK	IGFBP7	1.3	59.4	0
12	Immune cells	NK	NK	CD160	1.26	51.2	0
12	Immune cells	NK	NK	CD7	1.26	94.2	0
12	Immune cells	NK	NK	AKR1C3	1.24	55.9	0
12	Immune cells	NK	NK	RHOC	1.24	67.7	0
12	Immune cells	NK	NK	KLRC1	1.23	40.8	0
12	Immune cells	NK	NK	ID2	1.21	76	0
12	Immune cells	NK	NK	MYBL1	1.21	61.1	0
12	Immune cells	NK	NK	APMAP	1.18	69.9	0
12	Immune cells	NK	NK	SAMD3	1.15	66	0
12	Immune cells	NK	NK	TYROBP	1.15	98.3	0
12	Immune cells	NK	NK	CHST12	1.15	71.7	0
12	Immune cells	NK	NK	SRGN	1.14	97.7	0
12	Immune cells	NK	NK	TBX21	1.13	54.1	0
12	Immune cells	NK	NK	KLRG1	1.13	58.8	0
12	Immune cells	NK	NK	S1PR5	1.11	53.5	0
12	Immune cells	NK	NK	RARRES3	1.1	89.7	0
12	Immune cells	NK	NK	CLIC1	1.1	96.1	0
12	Immune cells	NK	NK	CD99	1.09	92.9	0
12	Immune cells	NK	NK	TTC38	1.08	52.4	0
12	Immune cells	NK	NK	ARL4C	1.08	94.5	0
12	Immune cells	NK	NK	PFN1	1.06	100	0
12	Immune cells	NK	NK	XBP1	1.06	74.7	0
12	Immune cells	NK	NK	CTSC	1.06	75.6	0
12	Immune cells	NK	NK	ARPC5L	1.05	73.3	0
12	Immune cells	NK	NK	ITGB2	1.05	96.7	0
12	Immune cells	NK	NK	GNPTAB	1.05	65.3	0
12	Immune cells	NK	NK	PLAC8	1.05	89.5	0
12	Immune cells	NK	NK	CD300A	1.04	59.7	0
12	Immune cells	NK	NK	JAK1	1.03	93.5	0
12	Immune cells	NK	NK	SYNE2	1.01	71.9	0
12	Immune cells	NK	NK	CHST2	1.01	50.8	0
12	Immune cells	NK	NK	PLEKHF1	1.01	55.4	0
12	Immune cells	NK	NK	RAP1B	1	94.7	0
12	Immune cells	NK	NK	CMC1	1	51.2	0
12	Immune cells	NK	NK	ALOX5AP	0.99	75.6	0
12	Immune cells	NK	NK	CYBA	0.99	99.9	0
12	Immune cells	NK	NK	IFITM1	0.98	74.9	0
12	Immune cells	NK	NK	CCL3	0.98	27.5	0
12	Immune cells	NK	NK	CD81	0.98	87	0
12	Immune cells	NK	NK	RUNX3	0.97	65.7	0
12	Immune cells	NK	NK	ABI3	0.97	54.7	0
12	Immune cells	NK	NK	CEP78	0.96	49.8	0
12	Immune cells	NK	NK	MBP	0.93	86.6	0
12	Immune cells	NK	NK	PRSS23	0.92	40.9	0
12	Immune cells	NK	NK	MYO1F	0.92	85.5	0
12	Immune cells	NK	NK	C12orf75	0.9	54.9	0
12	Immune cells	NK	NK	ZAP70	0.9	64	0
12	Immune cells	NK	NK	UBB	0.89	95.8	0
12	Immune cells	NK	NK	DBI	0.88	83.1	0
12	Immune cells	NK	NK	DOK2	0.88	68.8	0
12	Immune cells	NK	NK	NCR3	0.87	48	0
12	Immune cells	NK	NK	MYL12A	0.87	99.4	0
12	Immune cells	NK	NK	HLA-C	0.87	100	0
12	Immune cells	NK	NK	TPST2	0.86	60.7	0
12	Immune cells	NK	NK	SYNE1	0.86	63.8	0
12	Immune cells	NK	NK	CCL4L2	0.86	17	0
12	Immune cells	NK	NK	C1orf21	0.86	41.2	0
12	Immune cells	NK	NK	CFL1	0.86	99.7	0
12	Immune cells	NK	NK	MCTP2	0.85	44.4	0
12	Immune cells	NK	NK	DHRS7	0.84	70.4	0
12	Immune cells	NK	NK	GK5	0.84	45.1	0
12	Immune cells	NK	NK	FCRL6	0.83	37.2	0
12	Immune cells	NK	NK	GNG2	0.83	58	0
12	Immune cells	NK	NK	SH2D1B	0.83	39.2	0
12	Immune cells	NK	NK	SLC9A3R1	0.82	66.9	0
12	Immune cells	NK	NK	METRNL	0.82	45.2	0
12	Immune cells	NK	NK	RNF213	0.82	86	0
12	Immune cells	NK	NK	ADGRE5	0.82	69.8	0
12	Immune cells	NK	NK	ITGAL	0.81	62.9	0
12	Immune cells	NK	NK	LY6E	0.81	81.5	0
12	Immune cells	NK	NK	SPN	0.8	69.4	0
12	Immune cells	NK	NK	PTPN4	0.79	60.8	0
12	Immune cells	NK	NK	PSME2	0.79	77.7	0
12	Immune cells	NK	NK	CLEC2B	0.79	57.7	0
12	Immune cells	NK	NK	STOM	0.79	46	0
12	Immune cells	NK	NK	B2M	0.78	100	0
12	Immune cells	NK	NK	CALM1	0.78	98.9	0
12	Immune cells	NK	NK	PDIA3	0.78	76.2	0
12	Immune cells	NK	NK	ACTN4	0.77	58.1	0
12	Immune cells	NK	NK	CXXC5	0.77	52.6	0
12	Immune cells	NK	NK	OSTF1	0.77	67.9	0
12	Immune cells	NK	NK	NDUFB2	0.77	81.2	0
12	Immune cells	NK	NK	TXK	0.77	66.7	0
12	Immune cells	NK	NK	PTPN12	0.76	53.6	0
12	Immune cells	NK	NK	BIN2	0.76	82.6	0
12	Immune cells	NK	NK	SLAMF7	0.76	37.3	0
12	Immune cells	NK	NK	GPR65	0.76	52.1	0
12	Immune cells	NK	NK	SYNGR1	0.75	38.7	0
12	Immune cells	NK	NK	FKBP11	0.75	53.2	0
12	Immune cells	NK	NK	TFDP2	0.75	45.7	0
12	Immune cells	NK	NK	SH2D2A	0.75	38	0
12	Immune cells	NK	NK	LLGL2	0.74	40.9	0
12	Immune cells	NK	NK	NMUR1	0.74	33.6	0
12	Immune cells	NK	NK	FAM49B	0.73	78.1	0
12	Immune cells	NK	NK	ADRB2	0.73	39.6	0
12	Immune cells	NK	NK	LITAF	0.73	78.7	0
12	Immune cells	NK	NK	ARPC2	0.72	98.3	0
12	Immune cells	NK	NK	PRDX5	0.72	73.3	0
12	Immune cells	NK	NK	PILRB	0.71	50.1	0
12	Immune cells	NK	NK	IRF1	0.71	74	0
12	Immune cells	NK	NK	PSMB9	0.71	83.3	0
12	Immune cells	NK	NK	FLNA	0.71	76.9	0
12	Immune cells	NK	NK	TGFB1	0.71	77.1	0
12	Immune cells	NK	NK	TRGC1	0.7	38	0
12	Immune cells	NK	NK	DDIT4	0.7	45.5	0
12	Immune cells	NK	NK	GFOD1	0.7	33.1	0
12	Immune cells	NK	NK	RAC2	0.7	91.9	0
12	Immune cells	NK	NK	SEPT7	0.7	89	0
12	Immune cells	NK	NK	HSH2D	0.7	39.4	0
12	Immune cells	NK	NK	GBP5	0.7	42.8	0
12	Immune cells	NK	NK	PPP1R18	0.69	65.9	0
12	Immune cells	NK	NK	DIP2A	0.69	50.6	0
12	Immune cells	NK	NK	SKAP1	0.69	67	0
12	Immune cells	NK	NK	CCND3	0.69	82.5	0
12	Immune cells	NK	NK	IFITM3	0.69	41.8	0
12	Immune cells	NK	NK	RASSF1	0.68	45.6	0
12	Immune cells	NK	NK	PPIB	0.67	82.5	0
12	Immune cells	NK	NK	SYTL1	0.67	56.2	0
12	Immune cells	NK	NK	STAT4	0.67	44.8	0
12	Immune cells	NK	NK	PRKCH	0.67	55.8	0
12	Immune cells	NK	NK	SYTL3	0.67	42.2	0
12	Immune cells	NK	NK	PSME1	0.66	90.8	0
12	Immune cells	NK	NK	TLN1	0.66	76.2	0
12	Immune cells	NK	NK	IL2RG	0.66	75.3	0
12	Immune cells	NK	NK	LPCAT1	0.65	39.6	0
12	Immune cells	NK	NK	MSN	0.65	83.7	0
12	Immune cells	NK	NK	NCR1	0.65	29.4	0
12	Immune cells	NK	NK	CD38	0.64	30.1	0
12	Immune cells	NK	NK	NEIL1	0.64	27.7	0
12	Immune cells	NK	NK	FASLG	0.64	29.2	0
12	Immune cells	NK	NK	TGFBR3	0.64	30.4	0
12	Immune cells	NK	NK	HLA-A	0.63	100	0
12	Immune cells	NK	NK	MYL6	0.63	98.6	0
12	Immune cells	NK	NK	CTBP2	0.63	39.3	0
12	Immune cells	NK	NK	TNFRSF18	0.63	24.6	0
12	Immune cells	NK	NK	PLA2G16	0.63	31.5	0
12	Immune cells	NK	NK	F2R	0.62	27.8	0
12	Immune cells	NK	NK	ASCL2	0.62	26.9	0
12	Immune cells	NK	NK	CD53	0.62	82.2	0
12	Immune cells	NK	NK	NCAM1	0.62	26.5	0
12	Immune cells	NK	NK	GUK1	0.62	77.1	0
12	Immune cells	NK	NK	PPP1CA	0.61	79	0
12	Immune cells	NK	NK	USP28	0.61	34.3	0
12	Immune cells	NK	NK	TIGIT	0.61	30	0
12	Immune cells	NK	NK	IL18RAP	0.61	27.3	0
12	Immune cells	NK	NK	ZEB2	0.61	71.8	0
12	Immune cells	NK	NK	DTHD1	0.6	25.2	0
12	Immune cells	NK	NK	PRMT2	0.6	85.4	0
12	Immune cells	NK	NK	STARD3NL	0.6	32	0
12	Immune cells	NK	NK	EVL	0.59	90.2	0
12	Immune cells	NK	NK	RNF165	0.59	26	0
12	Immune cells	NK	NK	CTSD	0.58	75.6	0
12	Immune cells	NK	NK	HLA-E	0.58	99.7	0
12	Immune cells	NK	NK	LCP1	0.58	88.8	0
12	Immune cells	NK	NK	PLEKHG3	0.57	28.9	0
12	Immune cells	NK	NK	ACTB	0.56	100	0
12	Immune cells	NK	NK	MYL12B	0.56	92	0
12	Immune cells	NK	NK	MMP23B	0.55	24.4	0
12	Immune cells	NK	NK	RGS3	0.54	29.1	0
12	Immune cells	NK	NK	ZBTB16	0.54	30.9	0
12	Immune cells	NK	NK	A2M-AS1	0.54	27.4	0
12	Immune cells	NK	NK	ACTG1	0.54	99	0
12	Immune cells	NK	NK	CEBPD	0.54	65.5	0
12	Immune cells	NK	NK	YPEL1	0.53	26.9	0
12	Immune cells	NK	NK	HAVCR2	0.51	25	0
12	Immune cells	NK	NK	PRDM1	0.51	27.1	0
12	Immune cells	NK	NK	EOMES	0.5	23.1	0
12	Immune cells	NK	NK	PRR5L	0.5	23.5	0
12	Immune cells	NK	NK	SYTL2	0.49	24.3	0
12	Immune cells	NK	NK	OSBPL5	0.48	21.8	0
12	Immune cells	NK	NK	SIGLEC7	0.48	24.5	0
12	Immune cells	NK	NK	KIR2DL1	0.48	18.2	0
12	Immune cells	NK	NK	MT-ND5	0.48	99.6	0
12	Immune cells	NK	NK	FEZ1	0.47	19.5	0
12	Immune cells	NK	NK	RHOBTB3	0.47	20.8	0
12	Immune cells	NK	NK	HLA-B	0.46	100	0
12	Immune cells	NK	NK	SERF2	0.45	99.5	0
12	Immune cells	NK	NK	PDGFD	0.45	21.4	0
12	Immune cells	NK	NK	HES6	0.45	18.1	0
12	Immune cells	NK	NK	CD244	0.44	23	0
12	Immune cells	NK	NK	FBXO6	0.43	21.8	0
12	Immune cells	NK	NK	SLFN13	0.42	21.9	0
12	Immune cells	NK	NK	LINC02384	0.41	17.7	0
12	Immune cells	NK	NK	TMSB4X	0.41	100	0
12	Immune cells	NK	NK	TMEM273	0.4	19	0
12	Immune cells	NK	NK	NCALD	0.4	19.8	0
12	Immune cells	NK	NK	KIR2DL3	0.39	15.1	0
12	Immune cells	NK	NK	ADGRG5	0.37	17	0
12	Immune cells	NK	NK	KIR3DL2	0.37	14	0
12	Immune cells	NK	NK	ZNF595	0.37	16.9	0
12	Immune cells	NK	NK	DAB2	0.37	18.2	0
12	Immune cells	NK	NK	MLC1	0.36	16	0
12	Immune cells	NK	NK	PPP2R2B	0.35	15.9	0
12	Immune cells	NK	NK	KIR3DL1	0.34	13	0
12	Immune cells	NK	NK	RAB27B	0.33	15.6	0
12	Immune cells	NK	NK	TOX	0.33	16.2	0
12	Immune cells	NK	NK	LINC02084	0.33	14.9	0
12	Immune cells	NK	NK	MT-CO1	0.32	100	0
12	Immune cells	NK	NK	AC090152.1	0.31	14.5	0
12	Immune cells	NK	NK	KLRC2	0.3	10.7	0
12	Immune cells	NK	NK	CMKLR1	0.29	12.9	0
12	Immune cells	NK	NK	JAKMIP2	0.29	13.3	0
12	Immune cells	NK	NK	SLCO4C1	0.28	12.3	0
12	Immune cells	NK	NK	PDZD4	0.27	11.5	0
12	Immune cells	NK	NK	LIM2	0.27	10.7	0
12	Immune cells	NK	NK	BNC2	0.27	10.6	0
12	Immune cells	NK	NK	ERBB2	0.27	11.5	0
12	Immune cells	NK	NK	ADAMTS1	0.27	10.8	0
12	Immune cells	NK	NK	TSPOAP1	0.26	11.7	0
12	Immune cells	NK	NK	RAMP1	0.26	10.4	0
12	Immune cells	NK	NK	RGS9	0.25	10.4	0
12	Immune cells	NK	NK	FAU	-0.36	99.7	0
12	Immune cells	NK	NK	RPS24	-0.38	99.8	0
12	Immune cells	NK	NK	RPL7A	-0.41	99.8	0
12	Immune cells	NK	NK	RPL15	-0.43	99.2	0
12	Immune cells	NK	NK	RPS19	-0.45	99.8	0
12	Immune cells	NK	NK	RPS7	-0.47	99.7	0
12	Immune cells	NK	NK	UBA52	-0.47	98.2	0
12	Immune cells	NK	NK	RPL41	-0.48	99.9	0
12	Immune cells	NK	NK	RPL26	-0.48	99.4	0
12	Immune cells	NK	NK	PFDN5	-0.48	92.3	0
12	Immune cells	NK	NK	RPL24	-0.52	97.3	0
12	Immune cells	NK	NK	RPS27A	-0.52	99.8	0
12	Immune cells	NK	NK	RPL6	-0.54	99.7	0
12	Immune cells	NK	NK	RPL31	-0.54	84	0
12	Immune cells	NK	NK	RPL37A	-0.54	98.7	0
12	Immune cells	NK	NK	RPS15	-0.54	99.9	0
12	Immune cells	NK	NK	RPL14	-0.55	99.4	0
12	Immune cells	NK	NK	RPL10	-0.55	100	0
12	Immune cells	NK	NK	RPL3	-0.56	99.8	0
12	Immune cells	NK	NK	NACA	-0.56	98.4	0
12	Immune cells	NK	NK	RPL27A	-0.59	87.7	0
12	Immune cells	NK	NK	RACK1	-0.6	97.5	0
12	Immune cells	NK	NK	RPLP2	-0.62	99.8	0
12	Immune cells	NK	NK	RPSA	-0.64	97.8	0
12	Immune cells	NK	NK	RPS15A	-0.65	99.7	0
12	Immune cells	NK	NK	RPS29	-0.65	99.6	0
12	Immune cells	NK	NK	RPL29	-0.65	99.7	0
12	Immune cells	NK	NK	EEF2	-0.66	69.2	0
12	Immune cells	NK	NK	RPS10	-0.66	88.3	0
12	Immune cells	NK	NK	RPL28	-0.66	99.9	0
12	Immune cells	NK	NK	RPS27	-0.67	99.8	0
12	Immune cells	NK	NK	RPL38	-0.67	92.6	0
12	Immune cells	NK	NK	ZFAS1	-0.68	33.9	0
12	Immune cells	NK	NK	RPL21	-0.68	99.9	0
12	Immune cells	NK	NK	NAP1L1	-0.69	35.8	0
12	Immune cells	NK	NK	RPL18	-0.7	99.4	0
12	Immune cells	NK	NK	RPL13A	-0.71	98.6	0
12	Immune cells	NK	NK	RPS9	-0.71	98	0
12	Immune cells	NK	NK	RPL19	-0.72	99.9	0
12	Immune cells	NK	NK	RPL10A	-0.72	98.7	0
12	Immune cells	NK	NK	RPS14	-0.72	99.7	0
12	Immune cells	NK	NK	TPT1	-0.73	99.9	0
12	Immune cells	NK	NK	RPS4X	-0.73	99.4	0
12	Immune cells	NK	NK	RPL5	-0.73	98.8	0
12	Immune cells	NK	NK	RPLP1	-0.73	99.8	0
12	Immune cells	NK	NK	RPS21	-0.74	96.4	0
12	Immune cells	NK	NK	TMEM123	-0.74	14.4	0
12	Immune cells	NK	NK	RPL37	-0.75	99.6	0
12	Immune cells	NK	NK	SELL	-0.75	24.3	0
12	Immune cells	NK	NK	EEF1A1	-0.76	100	0
12	Immune cells	NK	NK	RPL4	-0.76	88.6	0
12	Immune cells	NK	NK	RPL36	-0.76	98.7	0
12	Immune cells	NK	NK	RPS28	-0.76	99.7	0
12	Immune cells	NK	NK	RPS11	-0.77	94.7	0
12	Immune cells	NK	NK	EIF3E	-0.77	47.1	0
12	Immune cells	NK	NK	RPL12	-0.77	98.3	0
12	Immune cells	NK	NK	RPL8	-0.77	98.5	0
12	Immune cells	NK	NK	EEF1B2	-0.78	92.9	0
12	Immune cells	NK	NK	RPL35A	-0.78	99.1	0
12	Immune cells	NK	NK	RPL30	-0.79	99.8	0
12	Immune cells	NK	NK	RPS3A	-0.82	99.7	0
12	Immune cells	NK	NK	RPS23	-0.82	99.8	0
12	Immune cells	NK	NK	RPS20	-0.82	85.7	0
12	Immune cells	NK	NK	RPS16	-0.83	98.5	0
12	Immune cells	NK	NK	RPS2	-0.83	99.7	0
12	Immune cells	NK	NK	RPS25	-0.83	98.5	0
12	Immune cells	NK	NK	RPS5	-0.84	96.7	0
12	Immune cells	NK	NK	RGS10	-0.84	11	0
12	Immune cells	NK	NK	RPL22	-0.86	96.6	0
12	Immune cells	NK	NK	RPL7	-0.87	89.3	0
12	Immune cells	NK	NK	RPLP0	-0.88	89.2	0
12	Immune cells	NK	NK	RPS6	-0.89	99.5	0
12	Immune cells	NK	NK	RPL11	-0.89	99.8	0
12	Immune cells	NK	NK	LEF1	-0.91	2	0
12	Immune cells	NK	NK	RPL34	-0.91	99.8	0
12	Immune cells	NK	NK	RPL9	-0.92	99	0
12	Immune cells	NK	NK	RPS18	-0.92	99.9	0
12	Immune cells	NK	NK	RPL13	-0.93	100	0
12	Immune cells	NK	NK	RPL23	-0.93	77.1	0
12	Immune cells	NK	NK	RCAN3	-0.93	0.6	0
12	Immune cells	NK	NK	CD27	-0.95	1.9	0
12	Immune cells	NK	NK	RPL18A	-0.95	99.6	0
12	Immune cells	NK	NK	CD52	-0.96	47.8	0
12	Immune cells	NK	NK	RPL32	-0.96	99.8	0
12	Immune cells	NK	NK	RPS13	-0.99	98.9	0
12	Immune cells	NK	NK	PABPC1	-1.02	66	0
12	Immune cells	NK	NK	RPL39	-1.02	99.4	0
12	Immune cells	NK	NK	TCF7	-1.04	11.5	0
12	Immune cells	NK	NK	RPS12	-1.07	99.7	0
12	Immune cells	NK	NK	RPS8	-1.07	99.4	0
12	Immune cells	NK	NK	LDHB	-1.13	36.8	0
12	Immune cells	NK	NK	VIM	-1.2	57	0
12	Immune cells	NK	NK	CD3G	-1.25	3.2	0
12	Immune cells	NK	NK	TRAC	-1.26	15	0
12	Immune cells	NK	NK	CCR7	-1.27	1.3	0
12	Immune cells	NK	NK	CD3D	-1.28	4.8	0
12	Immune cells	NK	NK	CD3E	-1.3	10.2	0
12	Immune cells	NK	NK	COTL1	-1.43	11.7	0
12	Immune cells	NK	NK	AIF1	-1.58	1.8	0
12	Immune cells	NK	NK	LTB	-1.95	18	0
12	Immune cells	NK	NK	IL7R	-2.08	3.1	0
12	Immune cells	NK	NK	H3F3B	0.44	98.9	5.03e-306
12	Immune cells	NK	NK	POLR2L	0.64	76.2	1.75e-303
12	Immune cells	NK	NK	RPL27	-0.41	96.1	3.57e-303
12	Immune cells	NK	NK	RPS3	-0.47	99.7	5.44e-303
12	Immune cells	NK	NK	RORA	0.62	61.5	1.19e-302
12	Immune cells	NK	NK	CORO1A	0.5	96.8	2.75e-302
12	Immune cells	NK	NK	SNHG8	-0.72	27.9	1.06e-301
12	Immune cells	NK	NK	NCF1	-1.03	3.6	1.82e-301
12	Immune cells	NK	NK	PIP4K2A	0.67	59.7	3.4e-300
12	Immune cells	NK	NK	RPL23A	-0.4	99.6	1.04e-296
12	Immune cells	NK	NK	PTGER2	0.52	30.9	1.76e-293
12	Immune cells	NK	NK	CXCR2	0.28	12.5	6.34e-293
12	Immune cells	NK	NK	DENND2D	0.69	61.7	1.7e-291
12	Immune cells	NK	NK	NFATC2	0.52	31.2	2.18e-286
12	Immune cells	NK	NK	CD226	0.59	38.7	2.06e-284
12	Immune cells	NK	NK	LINC002481	0.28	12.9	2.46e-281
12	Immune cells	NK	NK	FHL3	0.51	28.3	2.1e-280
12	Immune cells	NK	NK	BSG	0.64	58.1	3.65e-280
12	Immune cells	NK	NK	UBC	0.45	96.8	7.95e-280
12	Immune cells	NK	NK	NDUFB7	0.61	69.2	1.76e-277
12	Immune cells	NK	NK	ACAA2	0.62	41.3	1.9e-277
12	Immune cells	NK	NK	GOLGA8R	0.26	11.6	4.08e-277
12	Immune cells	NK	NK	ZNF600	0.39	21.1	1.8e-276
12	Immune cells	NK	NK	FUT11	0.49	27.9	1.84e-274
12	Immune cells	NK	NK	MVD	0.49	27.2	5.7e-274
12	Immune cells	NK	NK	DNAJC1	0.59	40.7	7.63e-273
12	Immune cells	NK	NK	VAV3	0.52	34.8	7.66e-273
12	Immune cells	NK	NK	RPL36A	-0.61	47.6	1.49e-272
12	Immune cells	NK	NK	TXNIP	0.44	99.5	4.46e-271
12	Immune cells	NK	NK	ENPP4	0.34	17.8	5.02e-270
12	Immune cells	NK	NK	CD44	-0.62	30.2	2.59e-269
12	Immune cells	NK	NK	PAXX	0.63	62.3	5.79e-269
12	Immune cells	NK	NK	IGF2R	0.6	41.9	1.46e-266
12	Immune cells	NK	NK	TRABD2A	-0.75	0.8	1.91e-266
12	Immune cells	NK	NK	SH3BGRL3	0.41	99.2	4.95e-266
12	Immune cells	NK	NK	AC004687.1	0.6	74.8	6.85e-264
12	Immune cells	NK	NK	RNF125	0.6	51.8	1.3e-261
12	Immune cells	NK	NK	TSEN54	0.5	31.3	5.71e-260
12	Immune cells	NK	NK	CFLAR	0.58	74.8	4.22e-256
12	Immune cells	NK	NK	SARAF	-0.62	63.1	2.33e-255
12	Immune cells	NK	NK	HLA-F	0.57	75	3.1e-255
12	Immune cells	NK	NK	NOP53	-0.57	62.1	4.91e-255
12	Immune cells	NK	NK	RNASET2	-0.61	27.1	2.15e-254
12	Immune cells	NK	NK	EMP3	0.5	91.6	2.59e-254
12	Immune cells	NK	NK	DHRS3	0.44	24.9	5.04e-254
12	Immune cells	NK	NK	MAPK1	0.61	51.6	2.64e-253
12	Immune cells	NK	NK	MMP25-AS1	0.5	32.2	1.72e-247
12	Immune cells	NK	NK	CISD3	0.6	40.5	2.11e-247
12	Immune cells	NK	NK	LINC00987	0.31	15	1.69e-246
12	Immune cells	NK	NK	CAPN12	0.34	16.2	2.38e-245
12	Immune cells	NK	NK	RPS26	-0.38	99	1.06e-242
12	Immune cells	NK	NK	CCDC28B	0.44	25.5	1.48e-242
12	Immune cells	NK	NK	CALR	0.68	69.5	1.33e-239
12	Immune cells	NK	NK	IQGAP2	0.62	54.2	2.01e-238
12	Immune cells	NK	NK	RPL35	-0.35	98.4	2.79e-236
12	Immune cells	NK	NK	STK10	0.6	60.6	1.59e-235
12	Immune cells	NK	NK	PPP2R5C	0.59	68.5	1.41e-233
12	Immune cells	NK	NK	S100A4	0.31	97.3	3.03e-233
12	Immune cells	NK	NK	EIF3L	-0.53	41.5	1.46e-232
12	Immune cells	NK	NK	AC245297.3	0.57	68.7	1.87e-230
12	Immune cells	NK	NK	CAMK4	-0.66	0.3	4.51e-230
12	Immune cells	NK	NK	CD4	-0.66	0.6	4.7e-230
12	Immune cells	NK	NK	UTRN	0.59	60.7	9.47e-230
12	Immune cells	NK	NK	RPS4Y1	-0.48	80.9	4.5e-229
12	Immune cells	NK	NK	PTPN22	0.53	35.1	6.35e-228
12	Immune cells	NK	NK	AKNA	0.58	65.9	7.07e-228
12	Immune cells	NK	NK	LSP1	0.47	85.4	2.74e-225
12	Immune cells	NK	NK	PIK3IP1	-0.69	18.3	1.19e-224
12	Immune cells	NK	NK	TMIGD2	0.58	36	1.94e-224
12	Immune cells	NK	NK	MAL	-0.67	0.3	2.45e-224
12	Immune cells	NK	NK	JAML	-0.8	1.2	3.08e-224
12	Immune cells	NK	NK	CDK2AP2	0.62	51.7	3.46e-222
12	Immune cells	NK	NK	NPM1	-0.52	78.1	3.82e-222
12	Immune cells	NK	NK	CHCHD10	-0.53	11.8	2.09e-221
12	Immune cells	NK	NK	LYAR	0.58	41.4	8.14e-220
12	Immune cells	NK	NK	EEF1D	-0.36	94.4	8.76e-218
12	Immune cells	NK	NK	TBC1D31	0.36	18.7	4.12e-217
12	Immune cells	NK	NK	EIF3H	-0.49	49.2	1.77e-216
12	Immune cells	NK	NK	ACTN1	-0.57	2.7	2.94e-216
12	Immune cells	NK	NK	HIPK2	0.58	40.2	9.23e-216
12	Immune cells	NK	NK	SERINC5	-0.58	2.5	9.3e-216
12	Immune cells	NK	NK	BTF3	-0.37	88.3	3.99e-215
12	Immune cells	NK	NK	PLP2	-0.58	12.9	8.67e-214
12	Immune cells	NK	NK	HLA-DRA	-2.34	5.2	2.79e-213
12	Immune cells	NK	NK	UBE2F	0.56	40.9	1.01e-212
12	Immune cells	NK	NK	CXCR4	-0.58	7.7	6.69e-212
12	Immune cells	NK	NK	ST3GAL4	0.25	12.1	2.68e-211
12	Immune cells	NK	NK	MIB2	0.53	34.8	6.13e-210
12	Immune cells	NK	NK	MIDN	0.54	43.6	1.76e-209
12	Immune cells	NK	NK	CYTOR	0.5	33.1	1.38e-208
12	Immune cells	NK	NK	BTG1	-0.44	87.4	6.09e-208
12	Immune cells	NK	NK	SPINT2	-0.49	0.6	2.8e-207
12	Immune cells	NK	NK	CEP126	0.3	13.4	7.06e-207
12	Immune cells	NK	NK	SUN2	0.55	64.5	9.7e-206
12	Immune cells	NK	NK	ABCA2	0.29	14.3	1.96e-205
12	Immune cells	NK	NK	DRAP1	0.51	69	2.59e-205
12	Immune cells	NK	NK	MT-ND1	-0.49	99.7	4.52e-205
12	Immune cells	NK	NK	FYN	0.56	65.4	6.7e-205
12	Immune cells	NK	NK	ATP2B4	0.49	32.8	3.51e-204
12	Immune cells	NK	NK	UBL5	0.45	82.9	4.13e-204
12	Immune cells	NK	NK	CLSTN3	0.27	13.5	1.41e-203
12	Immune cells	NK	NK	IL6ST	-0.56	2.4	2.67e-203
12	Immune cells	NK	NK	SH3BP5	0.55	52.7	1.03e-202
12	Immune cells	NK	NK	NOSIP	-0.69	32.3	2.69e-201
12	Immune cells	NK	NK	SUSD3	-0.51	0.7	5.84e-201
12	Immune cells	NK	NK	AOAH	0.49	35.8	1.57e-200
12	Immune cells	NK	NK	PLCB1	0.42	26.9	1.14e-199
12	Immune cells	NK	NK	APOBEC3C	0.55	40.3	2.87e-199
12	Immune cells	NK	NK	GSTP1	0.34	79.9	1.1e-198
12	Immune cells	NK	NK	BCL2L1	0.35	18.8	1.31e-198
12	Immune cells	NK	NK	PRR5	0.45	32.5	2.86e-198
12	Immune cells	NK	NK	CCDC107	0.54	46.2	4.94e-198
12	Immune cells	NK	NK	FCGRT	-0.69	3.4	1.62e-197
12	Immune cells	NK	NK	IL6R	-0.52	0.4	4.84e-197
12	Immune cells	NK	NK	ANXA6	0.55	62.2	3.85e-196
12	Immune cells	NK	NK	SLFN12L	0.43	31	4.01e-196
12	Immune cells	NK	NK	FGR	0.4	50.8	1.59e-195
12	Immune cells	NK	NK	ARHGEF3	0.51	37.3	2.19e-195
12	Immune cells	NK	NK	TLE1	0.31	16.7	5.58e-195
12	Immune cells	NK	NK	TBC1D10C	0.49	70.5	8.93e-195
12	Immune cells	NK	NK	RAP1GAP2	0.37	20.2	2.55e-194
12	Immune cells	NK	NK	EIF3G	0.54	82.1	6.2e-194
12	Immune cells	NK	NK	HOXB4	0.26	12.7	1.3e-193
12	Immune cells	NK	NK	CDC42	0.42	89.2	2.08e-193
12	Immune cells	NK	NK	MYC	-0.53	2.1	4.33e-192
12	Immune cells	NK	NK	PTPRC	0.32	97.7	2.9e-190
12	Immune cells	NK	NK	HLA-DRB1	-1.6	4.6	3.57e-190
12	Immune cells	NK	NK	SLC25A6	-0.42	71.3	4.55e-190
12	Immune cells	NK	NK	RGCC	-0.55	1.8	7.36e-190
12	Immune cells	NK	NK	KLF2	0.37	97.6	8.28e-190
12	Immune cells	NK	NK	ANP32B	-0.48	42.5	9.49e-190
12	Immune cells	NK	NK	BST2	0.52	61.8	2.23e-187
12	Immune cells	NK	NK	SLC15A4	0.45	29.9	9.26e-187
12	Immune cells	NK	NK	FMNL1	0.49	69.8	3.63e-186
12	Immune cells	NK	NK	TNFSF14	0.37	19.7	4.99e-186
12	Immune cells	NK	NK	CYBB	-1.18	0.7	6.05e-186
12	Immune cells	NK	NK	HINT1	-0.43	71.8	3.53e-184
12	Immune cells	NK	NK	ZBP1	0.37	20.7	5.29e-184
12	Immune cells	NK	NK	ZFYVE28	0.32	16.6	5.67e-184
12	Immune cells	NK	NK	RAB11FIP1	0.46	50.2	7.71e-184
12	Immune cells	NK	NK	TMEM154	-0.54	1.4	1.24e-183
12	Immune cells	NK	NK	CDKN2D	0.52	53.5	1.5e-182
12	Immune cells	NK	NK	IQGAP1	0.46	68.1	1.65e-182
12	Immune cells	NK	NK	GLIPR2	0.5	45.4	6.55e-182
12	Immune cells	NK	NK	TCF25	0.47	74	8.51e-182
12	Immune cells	NK	NK	PTPN7	0.5	38.4	9e-182
12	Immune cells	NK	NK	PSMB8	0.49	69.2	2.22e-181
12	Immune cells	NK	NK	ARPC4	0.47	67.9	2.15e-180
12	Immune cells	NK	NK	TOMM7	-0.38	86.2	2.51e-180
12	Immune cells	NK	NK	CCNI	-0.4	66.8	7.36e-180
12	Immune cells	NK	NK	AUTS2	0.33	18.7	1.86e-179
12	Immune cells	NK	NK	RASAL3	0.53	45.6	1.66e-178
12	Immune cells	NK	NK	AQP3	-0.59	1.1	2.17e-178
12	Immune cells	NK	NK	SH2D1A	0.49	33.4	5.92e-178
12	Immune cells	NK	NK	TRGC2	0.3	17.8	2.34e-177
12	Immune cells	NK	NK	ABCB1	0.27	13.4	4.12e-177
12	Immune cells	NK	NK	SDF2L1	0.56	40.2	9.88e-176
12	Immune cells	NK	NK	BTN3A2	0.51	60.7	3.05e-175
12	Immune cells	NK	NK	ADAM8	0.47	30.9	8.8e-175
12	Immune cells	NK	NK	MCUB	-0.45	13.7	1.88e-174
12	Immune cells	NK	NK	CCDC85B	0.49	66.9	2.84e-174
12	Immune cells	NK	NK	ANXA5	-0.66	2.4	3.55e-174
12	Immune cells	NK	NK	YWHAZ	0.45	81.7	1.39e-173
12	Immune cells	NK	NK	ERP29	-0.44	46.6	1.55e-173
12	Immune cells	NK	NK	CTSH	-0.65	0.8	4.66e-172
12	Immune cells	NK	NK	EBP	0.47	31.6	3.64e-170
12	Immune cells	NK	NK	GAB3	0.44	26.3	7.14e-170
12	Immune cells	NK	NK	GSAP	0.47	30.8	9.81e-169
12	Immune cells	NK	NK	TRAT1	-0.52	0.8	1.14e-168
12	Immune cells	NK	NK	HEG1	0.27	13.8	1.19e-168
12	Immune cells	NK	NK	EIF4B	-0.44	43.7	2.05e-168
12	Immune cells	NK	NK	HSP90AA1	0.39	90.8	8.9e-168
12	Immune cells	NK	NK	WIPI1	0.27	14	1.02e-167
12	Immune cells	NK	NK	ANXA1	0.44	77.9	1.96e-167
12	Immune cells	NK	NK	MACF1	0.53	59.9	2.62e-167
12	Immune cells	NK	NK	KLHDC4	0.46	31.4	6.03e-167
12	Immune cells	NK	NK	MLLT6	0.5	50.1	2.2e-166
12	Immune cells	NK	NK	BATF	0.44	29.1	4.28e-166
12	Immune cells	NK	NK	ARAP2	0.46	33.4	3.27e-164
12	Immune cells	NK	NK	LAIR1	0.49	41	7.27e-164
12	Immune cells	NK	NK	IFNGR2	-0.48	0	2.26e-163
12	Immune cells	NK	NK	FAM102A	-0.48	2.5	7.33e-163
12	Immune cells	NK	NK	STMN3	-0.49	4.5	1.09e-162
12	Immune cells	NK	NK	TGFBR1	0.4	24	2.08e-162
12	Immune cells	NK	NK	YBX3	-0.57	0.7	7.39e-162
12	Immune cells	NK	NK	BIRC3	-0.63	2.9	1.2e-161
12	Immune cells	NK	NK	MIEN1	0.51	44.1	2.05e-161
12	Immune cells	NK	NK	TAPBP	0.46	70.6	2.88e-161
12	Immune cells	NK	NK	TPI1	0.43	71.2	4.12e-161
12	Immune cells	NK	NK	DGKA	-0.5	9.1	4.61e-161
12	Immune cells	NK	NK	TKT	-0.73	27	1.62e-159
12	Immune cells	NK	NK	FAM118A	-0.47	21.8	2.13e-159
12	Immune cells	NK	NK	PTCH1	0.26	12.7	2.13e-158
12	Immune cells	NK	NK	FTL	-1.09	97.6	4.55e-158
12	Immune cells	NK	NK	YARS	0.42	29.3	7.8e-158
12	Immune cells	NK	NK	SNTB2	0.37	24.1	1.93e-157
12	Immune cells	NK	NK	SIT1	-0.44	0.3	9.85e-157
12	Immune cells	NK	NK	SIGIRR	0.5	56.1	1.56e-156
12	Immune cells	NK	NK	RAB37	0.43	29.3	2.11e-156
12	Immune cells	NK	NK	HENMT1	0.34	19.9	5.91e-156
12	Immune cells	NK	NK	IKZF2	0.28	15.3	2.16e-155
12	Immune cells	NK	NK	FOXP1	-0.5	38.4	5.68e-155
12	Immune cells	NK	NK	SPI1	-0.82	0.7	5.77e-155
12	Immune cells	NK	NK	FCRL3	0.33	22	2.73e-154
12	Immune cells	NK	NK	MYO1G	0.48	56.3	8.66e-154
12	Immune cells	NK	NK	CHCHD2	0.36	85.2	5.12e-153
12	Immune cells	NK	NK	ARPC3	0.3	94.2	1.07e-152
12	Immune cells	NK	NK	PPM1L	0.28	13.9	1.31e-152
12	Immune cells	NK	NK	PXN	0.47	36.7	3.26e-152
12	Immune cells	NK	NK	RAB29	0.49	41.6	4.21e-152
12	Immune cells	NK	NK	NPC1	0.31	17.5	2.71e-151
12	Immune cells	NK	NK	INPP5D	0.49	49.8	3.04e-151
12	Immune cells	NK	NK	HLA-DRB5	-0.85	1.6	3.3e-151
12	Immune cells	NK	NK	GCA	-0.57	1.3	8.21e-151
12	Immune cells	NK	NK	ITGAM	0.37	35.1	1.68e-150
12	Immune cells	NK	NK	PRELID1	0.42	66.9	7.17e-150
12	Immune cells	NK	NK	RAB9A	0.45	31.5	7.34e-150
12	Immune cells	NK	NK	IFI16	0.48	61.7	1.93e-149
12	Immune cells	NK	NK	NPRL2	0.41	27.6	2.46e-149
12	Immune cells	NK	NK	CARD11	0.35	22.4	1.22e-148
12	Immune cells	NK	NK	CMTM7	-0.38	3.6	1.51e-148
12	Immune cells	NK	NK	LGALS1	0.31	64.8	3.64e-148
12	Immune cells	NK	NK	GSN	0.41	29.7	3.78e-148
12	Immune cells	NK	NK	OPTN	0.43	38.1	4.56e-148
12	Immune cells	NK	NK	SRP14	0.31	92.6	1.26e-147
12	Immune cells	NK	NK	SNHG7	-0.44	13.4	1.7e-147
12	Immune cells	NK	NK	DAPP1	-0.45	1	2.18e-147
12	Immune cells	NK	NK	CCDC12	0.47	54.4	4.96e-147
12	Immune cells	NK	NK	TES	0.51	51.4	6.35e-147
12	Immune cells	NK	NK	UQCRB	-0.35	77.3	1.72e-146
12	Immune cells	NK	NK	SIPA1	0.5	45.8	7.86e-146
12	Immune cells	NK	NK	RHOF	0.49	46.3	1.06e-145
12	Immune cells	NK	NK	LDLRAP1	-0.44	6.6	1.36e-145
12	Immune cells	NK	NK	C6orf48	-0.4	15.4	1.56e-145
12	Immune cells	NK	NK	STX8	0.47	35.7	5.91e-145
12	Immune cells	NK	NK	CCDC102A	0.27	15	1.62e-144
12	Immune cells	NK	NK	PARK7	0.41	73.1	2.21e-144
12	Immune cells	NK	NK	FTH1	-0.73	97.1	2.67e-144
12	Immune cells	NK	NK	HMOX2	0.48	47.6	6.12e-144
12	Immune cells	NK	NK	PAFAH2	0.31	17.4	2.85e-143
12	Immune cells	NK	NK	MPEG1	-0.85	0.9	5.04e-143
12	Immune cells	NK	NK	DIAPH1	0.5	52.8	1.04e-142
12	Immune cells	NK	NK	TMA7	0.32	93.9	1.26e-142
12	Immune cells	NK	NK	SPCS2	0.46	62.9	1.83e-142
12	Immune cells	NK	NK	CD55	-0.43	11	3.11e-142
12	Immune cells	NK	NK	P4HB	0.5	53.8	7.25e-142
12	Immune cells	NK	NK	SNRPB	0.45	64	9.37e-142
12	Immune cells	NK	NK	CFP	-0.6	0.5	3.79e-141
12	Immune cells	NK	NK	DGKZ	0.45	61.6	1.53e-140
12	Immune cells	NK	NK	PSMB10	0.47	39.6	2.39e-140
12	Immune cells	NK	NK	KCTD10	0.3	17.1	2.39e-140
12	Immune cells	NK	NK	COX4I1	-0.29	90.1	2.4e-140
12	Immune cells	NK	NK	GTF3C1	0.41	24.6	3.16e-140
12	Immune cells	NK	NK	ARMH1	-0.41	0.8	3.86e-140
12	Immune cells	NK	NK	CYB5B	0.45	35.4	5.46e-140
12	Immune cells	NK	NK	POU2F2	-0.62	18.4	7.7e-140
12	Immune cells	NK	NK	G6PD	0.43	32.8	1.61e-139
12	Immune cells	NK	NK	RBM8A	0.46	59.2	4.2e-139
12	Immune cells	NK	NK	MEF2C	-0.67	2.7	7.59e-139
12	Immune cells	NK	NK	MT-ND3	-0.32	100	8.78e-138
12	Immune cells	NK	NK	TRAPPC1	0.44	67	2.18e-137
12	Immune cells	NK	NK	FOSB	-0.52	5.8	2.35e-137
12	Immune cells	NK	NK	PDE3B	-0.45	4.2	1e-136
12	Immune cells	NK	NK	AES	0.34	93	2.4e-136
12	Immune cells	NK	NK	FOS	-1.71	12.9	5.19e-136
12	Immune cells	NK	NK	TMEM14C	-0.34	3.5	2.87e-135
12	Immune cells	NK	NK	IL12RB1	0.34	19.4	8.35e-135
12	Immune cells	NK	NK	PREX1	0.47	41.1	2.78e-134
12	Immune cells	NK	NK	ZNF276	0.47	41.9	8.02e-134
12	Immune cells	NK	NK	SERP1	-0.39	53.5	1.93e-133
12	Immune cells	NK	NK	OXNAD1	-0.46	8.5	3.47e-133
12	Immune cells	NK	NK	LMAN2	0.48	52.8	3.73e-132
12	Immune cells	NK	NK	HLA-DPB1	-1.11	12.5	7.96e-132
12	Immune cells	NK	NK	SEC61B	0.42	68.5	1.25e-131
12	Immune cells	NK	NK	RFTN1	0.42	27.6	1.36e-131
12	Immune cells	NK	NK	SSR4	0.38	80.2	1.53e-131
12	Immune cells	NK	NK	RPS17	-0.37	22.3	1.98e-131
12	Immune cells	NK	NK	NDFIP1	-0.43	27	2.04e-131
12	Immune cells	NK	NK	MEX3C	0.36	22.6	4.2e-131
12	Immune cells	NK	NK	ADA	0.37	24.7	5.76e-131
12	Immune cells	NK	NK	MYDGF	0.47	43.7	1.73e-130
12	Immune cells	NK	NK	ISG15	0.45	40.3	2.1e-130
12	Immune cells	NK	NK	ARHGAP9	0.47	43.2	2.29e-129
12	Immune cells	NK	NK	COPE	0.42	63.6	2.98e-129
12	Immune cells	NK	NK	COX6A1	0.39	74.6	7.72e-129
12	Immune cells	NK	NK	LY86	-0.46	0.7	9.44e-129
12	Immune cells	NK	NK	CD320	0.43	28.9	1.63e-128
12	Immune cells	NK	NK	ATM	0.37	79.4	1.98e-128
12	Immune cells	NK	NK	MNDA	-1.51	2.1	3.03e-128
12	Immune cells	NK	NK	CBLB	0.41	30.1	8.35e-128
12	Immune cells	NK	NK	COX7C	-0.3	84.7	1.05e-127
12	Immune cells	NK	NK	ID3	-0.42	0	1.52e-127
12	Immune cells	NK	NK	JUNB	-0.52	43	1.83e-127
12	Immune cells	NK	NK	TMED9	0.47	44.2	1.83e-127
12	Immune cells	NK	NK	CAST	0.4	71.4	2.76e-127
12	Immune cells	NK	NK	RETREG1	-0.37	0.5	8.41e-127
12	Immune cells	NK	NK	SACM1L	0.42	33.8	9.07e-127
12	Immune cells	NK	NK	FCN1	-1.68	2.4	1.1e-126
12	Immune cells	NK	NK	NCF2	-0.72	0.6	8.09e-126
12	Immune cells	NK	NK	VAMP8	0.35	75	1.56e-125
12	Immune cells	NK	NK	IKZF3	0.44	46.4	1.65e-125
12	Immune cells	NK	NK	AXIN1	0.34	20.8	2.21e-125
12	Immune cells	NK	NK	LTA4H	-0.51	12	2.27e-125
12	Immune cells	NK	NK	GPR183	-0.43	2.1	5.28e-125
12	Immune cells	NK	NK	SASH3	0.45	40.3	7.01e-125
12	Immune cells	NK	NK	INPP4B	-0.41	0.8	7.72e-125
12	Immune cells	NK	NK	LINC01871	0.32	18.1	1.36e-123
12	Immune cells	NK	NK	CAPNS1	0.43	58	2.43e-123
12	Immune cells	NK	NK	DDX5	0.27	97.2	2.44e-123
12	Immune cells	NK	NK	MAP2K2	0.43	54.7	6.78e-123
12	Immune cells	NK	NK	SERPINB6	0.45	47.4	1.57e-122
12	Immune cells	NK	NK	PPT1	-0.44	7.2	1.9e-122
12	Immune cells	NK	NK	LST1	-1.01	7.2	3.13e-122
12	Immune cells	NK	NK	PKN1	0.44	50.4	4.63e-122
12	Immune cells	NK	NK	CD47	0.42	62.2	6.69e-122
12	Immune cells	NK	NK	KCTD12	-0.69	0.4	1.17e-121
12	Immune cells	NK	NK	CAPG	-0.47	2.8	1.4e-121
12	Immune cells	NK	NK	COL6A2	0.39	15.3	2.14e-121
12	Immune cells	NK	NK	VCAN	-1.85	2.6	2.26e-121
12	Immune cells	NK	NK	SUB1	0.34	80.1	2.37e-121
12	Immune cells	NK	NK	RAB27A	0.39	40.1	1.94e-120
12	Immune cells	NK	NK	HNRNPA2B1	0.29	94	1.95e-120
12	Immune cells	NK	NK	RAB8B	0.45	39.6	3.2e-120
12	Immune cells	NK	NK	CARD16	0.42	53.2	3.61e-120
12	Immune cells	NK	NK	CFD	-0.69	1	4.63e-120
12	Immune cells	NK	NK	SERPINA1	-0.87	0.8	9.38e-120
12	Immune cells	NK	NK	GBP2	0.46	39	1.04e-119
12	Immune cells	NK	NK	MT2A	0.52	45.8	1.65e-119
12	Immune cells	NK	NK	AC020656.1	-0.87	1.1	2.93e-119
12	Immune cells	NK	NK	RRBP1	0.42	34.6	3.57e-119
12	Immune cells	NK	NK	SCP2	0.44	47.9	6.14e-119
12	Immune cells	NK	NK	GRN	-0.88	6.5	9.43e-119
12	Immune cells	NK	NK	APOL6	0.45	39.8	1.7e-118
12	Immune cells	NK	NK	CD68	-0.63	0.6	2.27e-118
12	Immune cells	NK	NK	H1FX	-0.31	30.6	2.45e-118
12	Immune cells	NK	NK	PKM	-0.46	29.2	4.97e-118
12	Immune cells	NK	NK	CD36	-0.83	0.8	6.21e-118
12	Immune cells	NK	NK	MS4A6A	-0.82	0.5	8.87e-118
12	Immune cells	NK	NK	LMO4	0.44	37.8	1.03e-116
12	Immune cells	NK	NK	FBXW5	0.44	44	1.76e-116
12	Immune cells	NK	NK	CSF3R	-0.77	1.3	2.52e-116
12	Immune cells	NK	NK	MAP3K1	-0.39	7.2	2.61e-116
12	Immune cells	NK	NK	PPA1	-0.36	19.8	3.14e-116
12	Immune cells	NK	NK	PPIA	0.31	91.2	4.54e-116
12	Immune cells	NK	NK	CTSB	-0.54	8.4	4.69e-116
12	Immune cells	NK	NK	LINC01550	-0.36	0.3	7.9e-116
12	Immune cells	NK	NK	PABPC4	-0.33	8.6	1.8e-115
12	Immune cells	NK	NK	CD40LG	-0.39	0.2	2.17e-115
12	Immune cells	NK	NK	NT5C	0.42	43	2.19e-115
12	Immune cells	NK	NK	PLEC	-0.37	5.4	2.37e-115
12	Immune cells	NK	NK	TBCB	0.45	46.9	2.66e-115
12	Immune cells	NK	NK	CD28	-0.37	0.2	3.58e-115
12	Immune cells	NK	NK	CSTA	-0.7	0.4	6.21e-115
12	Immune cells	NK	NK	LAT2	0.39	35.4	8.43e-115
12	Immune cells	NK	NK	ATP5IF1	0.39	68.2	8.99e-115
12	Immune cells	NK	NK	FKBP5	-0.36	19	2.23e-114
12	Immune cells	NK	NK	INPP4A	0.42	42.5	3.16e-114
12	Immune cells	NK	NK	SLAMF6	0.31	20.5	4.68e-114
12	Immune cells	NK	NK	PSMA7	0.36	79.4	5.33e-114
12	Immune cells	NK	NK	AKAP13	0.39	71	8.96e-114
12	Immune cells	NK	NK	AP2A1	0.42	32.4	8.99e-114
12	Immune cells	NK	NK	THEMIS	-0.35	0.3	1.27e-113
12	Immune cells	NK	NK	ARID5A	0.41	32.3	1.33e-113
12	Immune cells	NK	NK	PRKCA	-0.39	10.7	1.51e-113
12	Immune cells	NK	NK	HSP90B1	0.39	66.6	2.73e-113
12	Immune cells	NK	NK	RSL1D1	-0.35	30.2	3.26e-113
12	Immune cells	NK	NK	MANF	0.44	34.1	6.43e-113
12	Immune cells	NK	NK	POLR2G	0.44	42.2	8.68e-113
12	Immune cells	NK	NK	GBP4	0.38	27.4	1.07e-112
12	Immune cells	NK	NK	DYNLL1	0.43	65	1.08e-112
12	Immune cells	NK	NK	CDC42SE1	0.4	64.1	1.27e-112
12	Immune cells	NK	NK	PSMB1	0.36	66.3	2.09e-112
12	Immune cells	NK	NK	LYL1	-0.36	0.5	2.23e-112
12	Immune cells	NK	NK	PCSK7	0.41	69.1	2.34e-112
12	Immune cells	NK	NK	DSTN	0.46	46.4	2.65e-112
12	Immune cells	NK	NK	RRAS2	0.28	17.2	3.39e-112
12	Immune cells	NK	NK	SDF4	0.43	37.1	1.16e-111
12	Immune cells	NK	NK	CD14	-0.89	1.3	3.44e-111
12	Immune cells	NK	NK	C9orf16	0.39	65.1	3.79e-111
12	Immune cells	NK	NK	NEDD8	0.37	70.2	9.24e-111
12	Immune cells	NK	NK	MT-ND2	-0.37	99.7	1.05e-110
12	Immune cells	NK	NK	HRH2	-0.35	0.1	1.75e-110
12	Immune cells	NK	NK	CIRBP	0.36	81.5	1.75e-110
12	Immune cells	NK	NK	SELPLG	0.45	50.2	1.95e-110
12	Immune cells	NK	NK	TRAPPC10	0.42	37	2.09e-110
12	Immune cells	NK	NK	RASSF2	-0.38	3	2.49e-110
12	Immune cells	NK	NK	TSHZ2	-0.45	0.4	8.61e-110
12	Immune cells	NK	NK	S100A12	-1.36	1.4	9.14e-110
12	Immune cells	NK	NK	ESD	-0.3	10.1	1.55e-109
12	Immune cells	NK	NK	IL17RA	-0.48	10.1	2e-109
12	Immune cells	NK	NK	HLA-DQB1	-0.98	4.6	2.34e-109
12	Immune cells	NK	NK	ARHGEF1	0.4	65.3	2.66e-109
12	Immune cells	NK	NK	CHMP7	-0.35	7.1	3.19e-109
12	Immune cells	NK	NK	RALY	0.44	48.6	4.79e-109
12	Immune cells	NK	NK	NELL2	-0.37	0.1	1.15e-108
12	Immune cells	NK	NK	SAMD9L	0.4	29.8	1.57e-108
12	Immune cells	NK	NK	MXRA7	0.3	17.8	2.09e-108
12	Immune cells	NK	NK	NFKBIZ	-0.34	2.2	2.77e-108
12	Immune cells	NK	NK	FAM43A	0.32	20.5	3.43e-108
12	Immune cells	NK	NK	STK4	0.31	83.8	4.97e-108
12	Immune cells	NK	NK	SMAP2	-0.37	40.1	2.09e-107
12	Immune cells	NK	NK	HCK	-0.46	0.3	2.55e-107
12	Immune cells	NK	NK	TSPAN32	0.39	29.3	3.28e-107
12	Immune cells	NK	NK	TIMP2	-0.43	0.5	3.55e-107
12	Immune cells	NK	NK	CAPN15	0.31	18.4	4.76e-107
12	Immune cells	NK	NK	HLA-DMA	-0.57	5.8	7.05e-107
12	Immune cells	NK	NK	HLA-DMB	-0.6	6.4	1.09e-106
12	Immune cells	NK	NK	ITGB7	0.45	40.3	1.85e-106
12	Immune cells	NK	NK	GAPT	-0.39	0.2	2.92e-106
12	Immune cells	NK	NK	BEX3	-0.35	1.2	2.95e-106
12	Immune cells	NK	NK	EVI2B	-0.45	30.7	3.07e-106
12	Immune cells	NK	NK	LYZ	-3.01	11.4	8.12e-106
12	Immune cells	NK	NK	MARCKS	-0.51	0.1	1.16e-105
12	Immune cells	NK	NK	S100A9	-3.36	13.4	2.7e-105
12	Immune cells	NK	NK	AGTRAP	0.36	39.6	3.8e-105
12	Immune cells	NK	NK	HLA-DPA1	-1.04	16.3	5.28e-105
12	Immune cells	NK	NK	TNFAIP2	-0.54	0.5	8.64e-105
12	Immune cells	NK	NK	BZW1	0.43	55.4	8.74e-105
12	Immune cells	NK	NK	ADD1	0.42	49.9	1.11e-104
12	Immune cells	NK	NK	SESN3	-0.32	1.3	3.37e-104
12	Immune cells	NK	NK	STK17A	0.36	65.7	3.74e-104
12	Immune cells	NK	NK	ARHGAP30	0.39	64.4	9.42e-104
12	Immune cells	NK	NK	C12orf57	-0.42	48.2	1.32e-103
12	Immune cells	NK	NK	FPR1	-0.54	0.2	1.47e-103
12	Immune cells	NK	NK	WDR83OS	0.38	61.1	1.48e-103
12	Immune cells	NK	NK	C4orf48	-0.37	7.3	2.58e-103
12	Immune cells	NK	NK	PHPT1	0.44	39.3	2.83e-103
12	Immune cells	NK	NK	MAN1A1	0.3	17.9	3.05e-103
12	Immune cells	NK	NK	BRI3	-0.67	23.1	8.07e-103
12	Immune cells	NK	NK	ITCH	0.39	30.4	1.58e-102
12	Immune cells	NK	NK	SRSF9	0.37	63.6	1.96e-102
12	Immune cells	NK	NK	CLEC7A	-0.52	1	2.46e-102
12	Immune cells	NK	NK	HLA-DQA1	-0.99	0.7	5.84e-102
12	Immune cells	NK	NK	SBK1	0.27	14.8	6.2e-102
12	Immune cells	NK	NK	PLEKHO1	-0.39	13.1	8.06e-102
12	Immune cells	NK	NK	SYPL1	-0.32	9	2.68e-101
12	Immune cells	NK	NK	TOMM20	-0.33	36.5	3.65e-101
12	Immune cells	NK	NK	CCDC88C	0.41	45.5	4.68e-101
12	Immune cells	NK	NK	MAML2	-0.34	8.9	1.08e-100
12	Immune cells	NK	NK	SSBP4	0.42	42.9	2.91e-100
12	Immune cells	NK	NK	BANF1	0.4	55.2	3.25e-100
12	Immune cells	NK	NK	RHOH	-0.37	15.3	3.57e-100
12	Immune cells	NK	NK	TPM3	0.29	83.5	5.09e-100
12	Immune cells	NK	NK	CD2BP2	0.4	33.8	1.63e-99
12	Immune cells	NK	NK	BCL11A	-0.52	0	5.69e-99
12	Immune cells	NK	NK	RIC3	-0.33	0.9	6.87e-99
12	Immune cells	NK	NK	LRRN3	-0.36	0.3	3.01e-98
12	Immune cells	NK	NK	CD84	-0.35	3.4	4.02e-98
12	Immune cells	NK	NK	DNPH1	-0.26	3.6	1.49e-97
12	Immune cells	NK	NK	APP	-0.31	0.7	1.67e-97
12	Immune cells	NK	NK	PLBD1	-0.51	0.2	2.52e-97
12	Immune cells	NK	NK	CD302	-0.43	0.8	2.76e-97
12	Immune cells	NK	NK	RBM39	0.31	80.7	2.92e-97
12	Immune cells	NK	NK	S100A8	-3.26	10.8	4.05e-97
12	Immune cells	NK	NK	AP1S2	-0.58	16.3	4.57e-97
12	Immune cells	NK	NK	DUSP1	-0.9	12.4	8.46e-97
12	Immune cells	NK	NK	TNFSF13B	-0.46	1.9	9.1e-97
12	Immune cells	NK	NK	PDIA6	0.41	45.1	9.56e-97
12	Immune cells	NK	NK	CASP8	0.4	42.9	9.57e-97
12	Immune cells	NK	NK	ARF1	0.37	63.1	2.05e-96
12	Immune cells	NK	NK	AGK	0.27	15.8	2.74e-96
12	Immune cells	NK	NK	ALKBH7	-0.3	22.4	5.61e-96
12	Immune cells	NK	NK	LMO2	-0.38	0.3	5.97e-96
12	Immune cells	NK	NK	SMDT1	-0.31	47.2	8.01e-96
12	Immune cells	NK	NK	C20orf204	-0.32	0.2	1.08e-95
12	Immune cells	NK	NK	TGFBI	-0.4	0.3	1.59e-95
12	Immune cells	NK	NK	CATSPER1	0.26	12.6	1.82e-95
12	Immune cells	NK	NK	LCK	0.36	67.2	1.99e-95
12	Immune cells	NK	NK	SLC25A37	-0.31	5.5	2.2e-95
12	Immune cells	NK	NK	RAB31	-0.4	0.5	2.82e-95
12	Immune cells	NK	NK	SLC11A1	-0.52	1	3.49e-95
12	Immune cells	NK	NK	OFD1	0.39	43.8	9.92e-95
12	Immune cells	NK	NK	SIRT2	0.35	24.8	1.03e-94
12	Immune cells	NK	NK	ARHGDIB	0.25	97.1	1.09e-94
12	Immune cells	NK	NK	TMEM50A	0.39	53.7	1.24e-94
12	Immune cells	NK	NK	MAP3K8	0.28	15.9	1.35e-94
12	Immune cells	NK	NK	LGALS3	-0.58	4.9	5.2e-94
12	Immune cells	NK	NK	FHIT	-0.35	3.4	6.42e-94
12	Immune cells	NK	NK	TPM4	0.44	46.1	7.69e-94
12	Immune cells	NK	NK	CREM	0.29	16.7	9.53e-94
12	Immune cells	NK	NK	C19orf66	0.39	39	1.4e-93
12	Immune cells	NK	NK	EPHX2	-0.31	1.2	1.52e-93
12	Immune cells	NK	NK	COMMD4	0.37	25.8	1.96e-93
12	Immune cells	NK	NK	GNAQ	-0.32	3.9	4.35e-93
12	Immune cells	NK	NK	EIF2S3	-0.29	25.6	7.58e-93
12	Immune cells	NK	NK	GNAS	-0.27	75.6	7.96e-93
12	Immune cells	NK	NK	BASP1	-0.37	0.3	1.54e-92
12	Immune cells	NK	NK	METRN	0.28	16.6	3.04e-92
12	Immune cells	NK	NK	HSPA5	0.44	53.5	3.16e-92
12	Immune cells	NK	NK	CASP4	0.4	51.9	3.27e-92
12	Immune cells	NK	NK	IDH2	0.38	34.2	4.31e-92
12	Immune cells	NK	NK	ANXA4	0.34	25	4.87e-92
12	Immune cells	NK	NK	BHLHE40	0.25	13.6	7.41e-92
12	Immune cells	NK	NK	GRK3	-0.31	0.5	1.5e-91
12	Immune cells	NK	NK	CPVL	-0.46	0.3	2.03e-91
12	Immune cells	NK	NK	RNASE6	-0.34	1.8	2.75e-91
12	Immune cells	NK	NK	TRG-AS1	0.34	27.2	3.09e-91
12	Immune cells	NK	NK	NEDD9	0.34	22.8	3.59e-91
12	Immune cells	NK	NK	APOBR	0.35	27.1	6.11e-91
12	Immune cells	NK	NK	RNF166	0.4	42.8	3.3e-90
12	Immune cells	NK	NK	LGALS2	-0.54	0.2	5.47e-90
12	Immune cells	NK	NK	PSMB6	0.37	47.3	1.18e-89
12	Immune cells	NK	NK	TADA3	0.41	36.1	1.84e-89
12	Immune cells	NK	NK	LRRK2	-0.39	0.3	2.6e-89
12	Immune cells	NK	NK	STK39	0.31	19.5	2.76e-89
12	Immune cells	NK	NK	SRPK2	0.4	42.6	5.63e-89
12	Immune cells	NK	NK	PATL2	0.27	16.2	6.11e-89
12	Immune cells	NK	NK	NLRC3	0.31	22.4	7.72e-89
12	Immune cells	NK	NK	SLC7A7	-0.38	0.4	1e-88
12	Immune cells	NK	NK	ALDH2	-0.35	0.3	1.17e-88
12	Immune cells	NK	NK	CIITA	-0.33	0.3	1.91e-88
12	Immune cells	NK	NK	TOB1	-0.27	5.7	2.02e-88
12	Immune cells	NK	NK	MRPS6	0.42	46.1	2.79e-88
12	Immune cells	NK	NK	CD79A	-1.25	1.3	3.07e-88
12	Immune cells	NK	NK	RNPEPL1	0.38	47.4	8.66e-88
12	Immune cells	NK	NK	ALOX5	-0.3	0.5	1.04e-87
12	Immune cells	NK	NK	POLR3GL	0.4	45.2	1.88e-87
12	Immune cells	NK	NK	ARF6	0.37	54.7	2.76e-87
12	Immune cells	NK	NK	FYB1	-0.36	72.4	2.84e-87
12	Immune cells	NK	NK	VASP	0.34	56.6	4.55e-87
12	Immune cells	NK	NK	ECH1	0.37	52.1	4.65e-87
12	Immune cells	NK	NK	GPATCH8	0.41	45.2	1.85e-86
12	Immune cells	NK	NK	SELENOW	0.37	58.8	2.64e-86
12	Immune cells	NK	NK	ACTR3	0.35	71.9	2.85e-86
12	Immune cells	NK	NK	LRP1	-0.34	0.2	3.1e-86
12	Immune cells	NK	NK	CYCS	0.38	49	3.1e-86
12	Immune cells	NK	NK	TBC1D4	-0.28	0.4	3.19e-86
12	Immune cells	NK	NK	A1BG	-0.26	4.5	5.68e-86
12	Immune cells	NK	NK	CD5	-0.26	0.3	1.09e-85
12	Immune cells	NK	NK	IRAK3	-0.35	0.3	2.59e-85
12	Immune cells	NK	NK	CD8B	-0.68	2.3	3.16e-85
12	Immune cells	NK	NK	CCDC88A	-0.46	5.5	4.86e-85
12	Immune cells	NK	NK	RAB32	-0.35	0.4	6.5e-85
12	Immune cells	NK	NK	NSA2	-0.31	42.9	7.8e-85
12	Immune cells	NK	NK	HDDC2	0.41	35.5	1.62e-84
12	Immune cells	NK	NK	SLC27A3	0.29	19.3	1.81e-84
12	Immune cells	NK	NK	RPL36AL	0.27	91.4	1.84e-84
12	Immune cells	NK	NK	HMGA1	-0.25	8.1	2.46e-84
12	Immune cells	NK	NK	IGSF6	-0.42	1.8	3.04e-84
12	Immune cells	NK	NK	GLCCI1	0.31	23.2	3.58e-84
12	Immune cells	NK	NK	MTSS1	0.31	23.2	3.76e-84
12	Immune cells	NK	NK	BTK	-0.27	0.2	4.97e-84
12	Immune cells	NK	NK	HMGN3	0.41	46.7	5.81e-84
12	Immune cells	NK	NK	IDI1	0.39	33.1	5.86e-84
12	Immune cells	NK	NK	LILRB2	-0.39	1	6.04e-84
12	Immune cells	NK	NK	POMP	0.38	52.9	1.45e-83
12	Immune cells	NK	NK	BNIP3L	-0.28	14.2	1.52e-83
12	Immune cells	NK	NK	CKAP4	-0.31	0.5	1.53e-83
12	Immune cells	NK	NK	CD82	-0.27	0.5	2.08e-83
12	Immune cells	NK	NK	PPP1R2	-0.32	30.7	2.18e-83
12	Immune cells	NK	NK	WDR1	0.39	51.7	2.35e-83
12	Immune cells	NK	NK	FGD2	-0.27	0.3	2.75e-83
12	Immune cells	NK	NK	LILRB3	-0.35	1.2	3.02e-83
12	Immune cells	NK	NK	SNX2	-0.35	14.9	3.27e-83
12	Immune cells	NK	NK	PSTPIP1	0.38	36.7	4.63e-83
12	Immune cells	NK	NK	CARHSP1	0.38	34.1	5.86e-83
12	Immune cells	NK	NK	BCL7C	0.41	42.2	5.98e-83
12	Immune cells	NK	NK	CTDSP1	0.4	43.5	1.17e-82
12	Immune cells	NK	NK	ATP5ME	0.34	68.3	1.29e-82
12	Immune cells	NK	NK	ENTPD1	-0.29	0.2	1.58e-82
12	Immune cells	NK	NK	PEBP1	-0.29	34.2	3.81e-82
12	Immune cells	NK	NK	DCTN3	0.37	44.2	4.15e-82
12	Immune cells	NK	NK	LINC02273	-0.27	1.3	8.6e-82
12	Immune cells	NK	NK	PRPF38B	0.36	62.3	1.06e-81
12	Immune cells	NK	NK	NCF4	-0.26	0.3	1.82e-81
12	Immune cells	NK	NK	FLT3LG	-0.3	8.8	3.86e-81
12	Immune cells	NK	NK	PSMD8	0.37	52.3	5.22e-81
12	Immune cells	NK	NK	PRAM1	-0.33	0.9	5.41e-81
12	Immune cells	NK	NK	USB1	0.33	21.1	8.26e-81
12	Immune cells	NK	NK	FXYD5	-0.27	65.7	8.32e-81
12	Immune cells	NK	NK	CD93	-0.51	2.9	1.08e-80
12	Immune cells	NK	NK	COX8A	0.33	67.6	1.76e-80
12	Immune cells	NK	NK	TYMP	-0.86	15	2.12e-80
12	Immune cells	NK	NK	RHOA	0.26	77.6	3.83e-80
12	Immune cells	NK	NK	NFATC3	0.4	41.4	7.04e-80
12	Immune cells	NK	NK	LINC00623	0.39	37.7	7.51e-80
12	Immune cells	NK	NK	ZNHIT1	0.37	49.6	1.09e-79
12	Immune cells	NK	NK	MAP4K4	-0.28	14.1	1.72e-79
12	Immune cells	NK	NK	SHTN1	-0.31	0.2	1.99e-79
12	Immune cells	NK	NK	CYB561D2	0.35	27.2	2.1e-79
12	Immune cells	NK	NK	SNHG25	-0.26	9.3	2.16e-79
12	Immune cells	NK	NK	CKLF	0.38	44.3	2.82e-79
12	Immune cells	NK	NK	LILRA2	-0.28	0.2	4.84e-79
12	Immune cells	NK	NK	PGD	-0.36	3.7	6.73e-79
12	Immune cells	NK	NK	DMXL2	-0.36	0.9	7.47e-79
12	Immune cells	NK	NK	RGS2	-0.59	3.1	1.75e-78
12	Immune cells	NK	NK	PTPRE	0.27	41.7	1.76e-78
12	Immune cells	NK	NK	TLR2	-0.31	0.3	2.05e-78
12	Immune cells	NK	NK	RBP7	-0.45	0.3	2.07e-78
12	Immune cells	NK	NK	CELF2	0.31	72.7	3.19e-78
12	Immune cells	NK	NK	CTSZ	-0.53	15.7	4.07e-78
12	Immune cells	NK	NK	HNRNPA3	0.3	74.9	5.3e-78
12	Immune cells	NK	NK	SLFN5	0.34	58.6	6.79e-78
12	Immune cells	NK	NK	IL4R	-0.41	6.4	7.07e-78
12	Immune cells	NK	NK	LPP	0.37	32.1	8.05e-78
12	Immune cells	NK	NK	CD33	-0.29	0.4	1.14e-77
12	Immune cells	NK	NK	ACBD5	0.3	20.1	1.32e-77
12	Immune cells	NK	NK	LRRC25	-0.29	0.4	1.59e-77
12	Immune cells	NK	NK	LASP1	0.38	37.2	6.16e-77
12	Immune cells	NK	NK	BCL11B	-0.4	22.3	6.73e-77
12	Immune cells	NK	NK	TMEM181	0.32	22.1	7.3e-77
12	Immune cells	NK	NK	CD300E	-0.36	0.4	8.48e-77
12	Immune cells	NK	NK	ASGR1	-0.31	0.2	2.42e-76
12	Immune cells	NK	NK	UQCR11	0.3	77.8	5.3e-76
12	Immune cells	NK	NK	NRGN	-0.63	0.6	5.36e-76
12	Immune cells	NK	NK	IER2	0.3	73.5	6.87e-76
12	Immune cells	NK	NK	SULT1A1	-0.26	1.4	1.19e-75
12	Immune cells	NK	NK	SELENOK	0.38	42.9	1.29e-75
12	Immune cells	NK	NK	WIPF1	0.36	54.4	1.45e-75
12	Immune cells	NK	NK	CHRM3-AS2	-0.27	2.1	1.9e-75
12	Immune cells	NK	NK	LINC00861	0.31	56.7	2.13e-75
12	Immune cells	NK	NK	CRTAP	-0.3	6.4	8.56e-75
12	Immune cells	NK	NK	AC025164.1	-0.28	6.2	1.29e-74
12	Immune cells	NK	NK	GPR155	-0.29	5.8	1.42e-74
12	Immune cells	NK	NK	PPP1R12A	0.36	55	1.72e-74
12	Immune cells	NK	NK	NDUFA1	0.3	67.9	1.81e-74
12	Immune cells	NK	NK	PITPNC1	0.37	35.8	2.57e-74
12	Immune cells	NK	NK	KLF4	-0.3	0.5	2.92e-74
12	Immune cells	NK	NK	VAMP2	0.3	70.4	3.54e-74
12	Immune cells	NK	NK	YWHAQ	0.38	46	5.4e-74
12	Immune cells	NK	NK	AFF3	-0.34	0.6	9.37e-74
12	Immune cells	NK	NK	LILRA5	-0.3	0	1.08e-73
12	Immune cells	NK	NK	CYP1B1	-0.52	0.3	1.23e-73
12	Immune cells	NK	NK	CCR2	-0.27	0.2	1.44e-73
12	Immune cells	NK	NK	RAB8A	0.36	39.9	1.81e-73
12	Immune cells	NK	NK	ATOX1	0.37	32.5	3.74e-73
12	Immune cells	NK	NK	ZNF385A	-0.26	0.2	4.22e-73
12	Immune cells	NK	NK	CLEC4A	-0.26	0.2	5.85e-73
12	Immune cells	NK	NK	FAM198B	-0.3	0.1	5.9e-73
12	Immune cells	NK	NK	PSMA5	0.36	49.7	6.49e-73
12	Immune cells	NK	NK	PARP15	0.28	19.9	7.62e-73
12	Immune cells	NK	NK	FAM173A	0.35	32.6	1.28e-72
12	Immune cells	NK	NK	SSBP3	0.38	28.2	1.66e-72
12	Immune cells	NK	NK	PLEKHA1	0.37	42.3	1.82e-72
12	Immune cells	NK	NK	ATP5MC3	0.28	66.6	1.9e-72
12	Immune cells	NK	NK	CSK	0.36	56.3	1.94e-72
12	Immune cells	NK	NK	TMEM59	0.32	60.3	2.19e-72
12	Immune cells	NK	NK	FDPS	0.37	38	2.37e-72
12	Immune cells	NK	NK	RBM47	-0.27	0.2	2.48e-72
12	Immune cells	NK	NK	ANPEP	-0.29	0.1	3.17e-72
12	Immune cells	NK	NK	KDELR2	0.38	38	3.36e-72
12	Immune cells	NK	NK	STUB1	0.35	49.4	3.37e-72
12	Immune cells	NK	NK	BANK1	-0.63	0.4	5.78e-72
12	Immune cells	NK	NK	BACH2	-0.29	3.4	6.15e-72
12	Immune cells	NK	NK	ST13	-0.28	37.8	6.58e-72
12	Immune cells	NK	NK	CAPZB	0.3	73.1	1.39e-71
12	Immune cells	NK	NK	FNDC3B	0.29	22.1	1.66e-71
12	Immune cells	NK	NK	HVCN1	-0.44	6.2	1.85e-71
12	Immune cells	NK	NK	C19orf38	-0.25	0.5	2.9e-71
12	Immune cells	NK	NK	ABLIM1	-0.28	11.8	4.61e-71
12	Immune cells	NK	NK	BST1	-0.28	0.2	5.97e-71
12	Immune cells	NK	NK	SLC20A1	0.34	28.1	6.21e-71
12	Immune cells	NK	NK	STK26	0.33	25.8	8.92e-71
12	Immune cells	NK	NK	TAP1	0.37	38.6	1.79e-70
12	Immune cells	NK	NK	RPS19BP1	0.35	46.2	2.82e-70
12	Immune cells	NK	NK	SEC11C	0.38	37.7	4.25e-70
12	Immune cells	NK	NK	ADK	-0.27	5.2	5.03e-70
12	Immune cells	NK	NK	ATP5PF	0.31	62.8	8.13e-70
12	Immune cells	NK	NK	MSL3	-0.26	12.7	8.83e-70
12	Immune cells	NK	NK	ZFPM1	0.33	24.2	1.14e-69
12	Immune cells	NK	NK	MS4A1	-1.01	0.7	1.91e-69
12	Immune cells	NK	NK	PDK1	-0.26	4.2	2.9e-69
12	Immune cells	NK	NK	GPX4	-0.29	52.1	4.1e-69
12	Immune cells	NK	NK	TMEM160	0.36	45	6.14e-69
12	Immune cells	NK	NK	PTPRA	0.38	40.1	8.88e-69
12	Immune cells	NK	NK	ACAP1	0.27	74.1	1.13e-68
12	Immune cells	NK	NK	CDA	-0.29	0.1	1.18e-68
12	Immune cells	NK	NK	KCNK6	-0.26	3.9	1.9e-68
12	Immune cells	NK	NK	TRANK1	0.28	19.9	2.4e-68
12	Immune cells	NK	NK	MS4A7	-0.33	0.1	3.13e-68
12	Immune cells	NK	NK	P2RY13	-0.26	0.1	8.34e-68
12	Immune cells	NK	NK	IFI35	0.32	26.9	9.46e-68
12	Immune cells	NK	NK	EMILIN2	-0.26	2.3	1.06e-67
12	Immune cells	NK	NK	CPPED1	-0.31	3.1	1.1e-67
12	Immune cells	NK	NK	PYGL	-0.25	0	1.43e-67
12	Immune cells	NK	NK	NFKBIB	0.28	17.9	1.52e-67
12	Immune cells	NK	NK	PASK	-0.25	1.1	1.55e-67
12	Immune cells	NK	NK	C5AR1	-0.32	0.3	2.46e-67
12	Immune cells	NK	NK	MAD2L2	0.31	21.5	2.85e-67
12	Immune cells	NK	NK	UXT	-0.27	50.2	2.86e-67
12	Immune cells	NK	NK	RPA2	0.37	38.6	3.43e-67
12	Immune cells	NK	NK	PTAFR	-0.25	0.2	5.32e-67
12	Immune cells	NK	NK	IFI27L2	0.36	32.8	5.75e-67
12	Immune cells	NK	NK	ZNF428	0.34	39	8.1e-67
12	Immune cells	NK	NK	RGS18	-0.3	0.6	1.45e-66
12	Immune cells	NK	NK	ATP6V0E1	0.26	73.6	3.11e-66
12	Immune cells	NK	NK	SCPEP1	-0.28	7.7	3.55e-66
12	Immune cells	NK	NK	TUBB4B	0.36	31.9	9.21e-66
12	Immune cells	NK	NK	PAG1	-0.26	14	1.36e-65
12	Immune cells	NK	NK	PIN1	0.34	37.1	1.59e-65
12	Immune cells	NK	NK	C1orf162	0.32	60.9	1.8e-65
12	Immune cells	NK	NK	ITM2C	-0.26	0.3	1.84e-65
12	Immune cells	NK	NK	COMMD7	0.35	39.2	2.01e-65
12	Immune cells	NK	NK	RNF130	-0.45	10.7	2.1e-65
12	Immune cells	NK	NK	ICAM3	0.31	65.2	2.14e-65
12	Immune cells	NK	NK	LINC00926	-0.6	0.7	2.63e-65
12	Immune cells	NK	NK	MAFB	-0.32	0.1	2.91e-65
12	Immune cells	NK	NK	LEPROTL1	-0.3	32.5	3.47e-65
12	Immune cells	NK	NK	PTPN18	0.33	35.4	4.79e-65
12	Immune cells	NK	NK	MXD4	0.36	37.2	6.96e-65
12	Immune cells	NK	NK	ARHGAP24	-0.27	0	7.68e-65
12	Immune cells	NK	NK	RFLNB	-0.26	15	8.14e-65
12	Immune cells	NK	NK	MAPRE2	0.33	27.9	9.27e-65
12	Immune cells	NK	NK	IGHM	-1.79	1.6	1.27e-64
12	Immune cells	NK	NK	UCP2	0.3	73.2	1.3e-64
12	Immune cells	NK	NK	BAX	0.36	48.1	1.32e-64
12	Immune cells	NK	NK	CREB5	-0.25	0.1	1.75e-64
12	Immune cells	NK	NK	TMED10	0.35	43.5	1.82e-64
12	Immune cells	NK	NK	JTB	0.28	63.3	2.66e-64
12	Immune cells	NK	NK	SEC11A	0.3	57.5	3.45e-64
12	Immune cells	NK	NK	TMEM109	0.34	31.5	7.29e-64
12	Immune cells	NK	NK	HELZ	0.34	39.2	1.08e-63
12	Immune cells	NK	NK	GIMAP4	0.28	78.9	1.14e-63
12	Immune cells	NK	NK	NCK2	-0.27	18.3	1.63e-63
12	Immune cells	NK	NK	PDE7A	-0.28	21.8	1.76e-63
12	Immune cells	NK	NK	TRIR	0.26	79.1	2.23e-63
12	Immune cells	NK	NK	TNFRSF13C	-0.37	0.2	2.25e-63
12	Immune cells	NK	NK	APOL2	0.29	18.8	2.61e-63
12	Immune cells	NK	NK	IGHD	-0.77	0.2	3.16e-63
12	Immune cells	NK	NK	RASSF4	0.3	24	4.99e-63
12	Immune cells	NK	NK	UFC1	0.34	54	5.61e-63
12	Immune cells	NK	NK	SSNA1	0.31	44.2	9.82e-63
12	Immune cells	NK	NK	VMP1	-0.43	18.5	1.25e-62
12	Immune cells	NK	NK	ZCCHC17	0.34	28.9	1.6e-62
12	Immune cells	NK	NK	MYADM	-0.26	8.6	2.51e-62
12	Immune cells	NK	NK	NDUFA12	0.29	61.7	1.28e-61
12	Immune cells	NK	NK	F13A1	-0.3	0.1	1.55e-61
12	Immune cells	NK	NK	NFE2	-0.26	0.3	1.82e-61
12	Immune cells	NK	NK	RNF167	0.36	32.7	2.3e-61
12	Immune cells	NK	NK	BCL2	-0.29	12.5	2.4e-61
12	Immune cells	NK	NK	RALGDS	0.26	17.7	2.64e-61
12	Immune cells	NK	NK	PRR13	0.3	65.5	3.15e-61
12	Immune cells	NK	NK	FURIN	0.26	17.5	5.33e-61
12	Immune cells	NK	NK	PARP8	0.34	34.9	5.55e-61
12	Immune cells	NK	NK	BRK1	0.26	66.9	1.64e-60
12	Immune cells	NK	NK	NCOA1	0.32	28.9	6.09e-60
12	Immune cells	NK	NK	ICAM2	0.35	41.5	6.37e-60
12	Immune cells	NK	NK	NAMPT	-0.27	3.7	7.24e-60
12	Immune cells	NK	NK	TAOK3	0.35	50.8	1.03e-59
12	Immune cells	NK	NK	HNRNPF	0.29	63.2	1.05e-59
12	Immune cells	NK	NK	FUS	0.25	83.1	2.04e-59
12	Immune cells	NK	NK	YPEL3	0.34	62.1	3.49e-59
12	Immune cells	NK	NK	PDLIM2	0.34	38	4.97e-59
12	Immune cells	NK	NK	AC239800.3	0.25	17.5	6.97e-59
12	Immune cells	NK	NK	RABAC1	0.32	56.9	1.04e-58
12	Immune cells	NK	NK	PSMB3	0.28	56.4	1.1e-58
12	Immune cells	NK	NK	DAD1	0.32	59.9	1.15e-58
12	Immune cells	NK	NK	CYTH1	0.3	53.6	1.42e-58
12	Immune cells	NK	NK	GATAD2A	0.32	27.8	2.41e-58
12	Immune cells	NK	NK	SMIM25	-0.27	0.3	3.25e-58
12	Immune cells	NK	NK	ADCY7	0.33	29.5	7.5e-58
12	Immune cells	NK	NK	NPC2	-0.34	19.8	1.55e-57
12	Immune cells	NK	NK	PCNX4	0.36	28.7	2.34e-57
12	Immune cells	NK	NK	SELENOT	0.33	41.6	3.04e-57
12	Immune cells	NK	NK	FKBP2	0.37	37.3	3.56e-57
12	Immune cells	NK	NK	ATP5MF	0.29	61.2	5.13e-57
12	Immune cells	NK	NK	CASP10	0.29	21.4	5.47e-57
12	Immune cells	NK	NK	UBE2I	0.28	60.9	8.19e-57
12	Immune cells	NK	NK	MCL1	-0.37	33.6	9.4e-57
12	Immune cells	NK	NK	TNFRSF25	-0.25	9	1.36e-56
12	Immune cells	NK	NK	CD74	-1.66	52.9	2.12e-56
12	Immune cells	NK	NK	RAD9A	0.3	24.3	2.43e-56
12	Immune cells	NK	NK	NDUFS6	0.3	53.5	3.17e-56
12	Immune cells	NK	NK	BUD31	0.33	38.2	3.99e-56
12	Immune cells	NK	NK	RNF126	0.33	33.9	5.43e-56
12	Immune cells	NK	NK	ILKAP	0.32	26.2	6.36e-56
12	Immune cells	NK	NK	EHD1	0.33	29.9	1.04e-55
12	Immune cells	NK	NK	TCL1A	-0.87	0.3	1.41e-55
12	Immune cells	NK	NK	PPP5C	0.26	17.5	3.42e-55
12	Immune cells	NK	NK	NCL	0.28	74.7	7.08e-55
12	Immune cells	NK	NK	SEC61G	0.31	54.4	9.97e-55
12	Immune cells	NK	NK	TAPBPL	0.26	17.3	1.01e-54
12	Immune cells	NK	NK	GYG1	0.28	22.2	1.02e-54
12	Immune cells	NK	NK	SDCBP	-0.34	22.1	1.35e-54
12	Immune cells	NK	NK	FAM107B	0.29	63.1	2.08e-54
12	Immune cells	NK	NK	SAR1A	0.33	32.3	2.09e-54
12	Immune cells	NK	NK	RAP2B	0.34	38	2.4e-54
12	Immune cells	NK	NK	PIM1	0.33	36	3.17e-54
12	Immune cells	NK	NK	AKT1	0.31	26.8	1.56e-53
12	Immune cells	NK	NK	SF3B2	0.29	57.2	1.75e-53
12	Immune cells	NK	NK	TERF2IP	0.3	52.5	2.72e-53
12	Immune cells	NK	NK	DNAJC8	0.33	53.2	3.45e-53
12	Immune cells	NK	NK	IVNS1ABP	0.33	30.4	4.07e-53
12	Immune cells	NK	NK	FERMT3	0.27	48.3	8.37e-53
12	Immune cells	NK	NK	NDUFS8	0.32	45.6	9.5e-53
12	Immune cells	NK	NK	GABPB1-AS1	-0.29	41.2	9.65e-53
12	Immune cells	NK	NK	RALGPS2	-0.42	4.5	9.97e-53
12	Immune cells	NK	NK	GLRX	0.28	59.1	1.05e-52
12	Immune cells	NK	NK	SCLT1	0.3	22.4	1.66e-52
12	Immune cells	NK	NK	SLA	0.38	43.5	3.2e-52
12	Immune cells	NK	NK	RPS6KA1	0.31	33.6	3.84e-52
12	Immune cells	NK	NK	TLE4	0.33	43.8	5.75e-52
12	Immune cells	NK	NK	COX17	0.34	40.3	6.06e-52
12	Immune cells	NK	NK	OGFRL1	-0.3	6.9	6.5e-52
12	Immune cells	NK	NK	DUSP2	0.33	16.1	6.86e-52
12	Immune cells	NK	NK	PSENEN	0.31	25.4	7.07e-52
12	Immune cells	NK	NK	C1orf174	0.27	21	7.41e-52
12	Immune cells	NK	NK	TSC22D4	0.32	45.7	9.28e-52
12	Immune cells	NK	NK	NAGK	-0.26	13	1.28e-51
12	Immune cells	NK	NK	ARHGEF9	0.26	20.2	1.64e-51
12	Immune cells	NK	NK	SAP18	0.26	63.1	2.48e-51
12	Immune cells	NK	NK	RASSF5	0.32	39.3	2.58e-51
12	Immune cells	NK	NK	CSNK1D	0.33	33.3	4.78e-51
12	Immune cells	NK	NK	VPS37B	0.28	21.3	6.13e-51
12	Immune cells	NK	NK	DERL1	0.31	27.3	7.94e-51
12	Immune cells	NK	NK	CD164	0.31	53.6	9.64e-51
12	Immune cells	NK	NK	ARHGDIA	0.28	53	1.63e-50
12	Immune cells	NK	NK	SDF2	0.31	29.1	1.74e-50
12	Immune cells	NK	NK	ANAPC11	0.33	43.7	2.52e-50
12	Immune cells	NK	NK	NPRL3	0.29	22.8	5.92e-50
12	Immune cells	NK	NK	NDUFA3	0.29	54.8	1.12e-49
12	Immune cells	NK	NK	UBE2L6	0.31	36.7	1.84e-49
12	Immune cells	NK	NK	UBE2L3	0.31	46	2.58e-49
12	Immune cells	NK	NK	CST3	-1.64	14.2	2.83e-49
12	Immune cells	NK	NK	DEF6	0.32	37.5	6.62e-49
12	Immune cells	NK	NK	C1orf56	0.34	40.3	8.16e-49
12	Immune cells	NK	NK	UQCR10	0.26	66	1.38e-48
12	Immune cells	NK	NK	PDAP1	0.32	37.7	1.87e-48
12	Immune cells	NK	NK	SH3KBP1	0.29	52.1	1.94e-48
12	Immune cells	NK	NK	NCK1	0.3	31.9	3.03e-48
12	Immune cells	NK	NK	GIMAP6	0.31	29.1	3.62e-48
12	Immune cells	NK	NK	CLEC12A	-0.33	5.1	3.66e-48
12	Immune cells	NK	NK	BLVRB	-0.37	10.9	4.33e-48
12	Immune cells	NK	NK	PSD4	0.29	25.1	4.96e-48
12	Immune cells	NK	NK	ITGB1BP1	0.31	31.2	6.82e-48
12	Immune cells	NK	NK	NDUFC2	0.3	49.4	7.96e-48
12	Immune cells	NK	NK	P2RX5	-0.27	1.4	1.23e-47
12	Immune cells	NK	NK	SAMD9	0.32	36.2	1.24e-47
12	Immune cells	NK	NK	TNFRSF1A	0.29	31.9	1.26e-47
12	Immune cells	NK	NK	FAM96B	0.3	44.7	1.31e-47
12	Immune cells	NK	NK	HEXA	0.31	34.5	3.89e-47
12	Immune cells	NK	NK	SWAP70	-0.26	4.1	4.22e-47
12	Immune cells	NK	NK	TNIK	0.26	21.5	4.71e-47
12	Immune cells	NK	NK	PSMC3	0.3	31.9	8.2e-47
12	Immune cells	NK	NK	SETD3	0.29	23.4	1.26e-46
12	Immune cells	NK	NK	GALNT10	0.26	19.8	1.35e-46
12	Immune cells	NK	NK	CD37	-0.45	76.6	2.76e-46
12	Immune cells	NK	NK	IGKC	-2.38	2.2	5.54e-46
12	Immune cells	NK	NK	SPSB3	0.31	36.2	9.14e-46
12	Immune cells	NK	NK	S100PBP	0.28	22.8	1.36e-45
12	Immune cells	NK	NK	PTGER4	0.3	22.8	2.44e-45
12	Immune cells	NK	NK	CCM2	0.31	42.5	2.85e-45
12	Immune cells	NK	NK	ERN1	0.25	19.5	2.95e-45
12	Immune cells	NK	NK	LNPEP	0.31	46.1	2.98e-45
12	Immune cells	NK	NK	VPS26A	0.29	26	3.54e-45
12	Immune cells	NK	NK	TALDO1	-0.42	33.4	1.22e-44
12	Immune cells	NK	NK	TSTD1	0.28	53.8	1.36e-44
12	Immune cells	NK	NK	IDS	0.31	40.5	1.49e-44
12	Immune cells	NK	NK	BTN3A1	0.29	26.1	1.82e-44
12	Immune cells	NK	NK	SH3BP1	0.32	31.9	1.97e-44
12	Immune cells	NK	NK	RXRA	-0.26	6.2	2e-44
12	Immune cells	NK	NK	TUBA1B	0.28	63.1	2.72e-44
12	Immune cells	NK	NK	UCHL5	0.28	23.8	9.83e-44
12	Immune cells	NK	NK	DEK	0.27	59.9	1.86e-43
12	Immune cells	NK	NK	LAMP1	0.3	42.1	2.65e-43
12	Immune cells	NK	NK	CHMP2A	0.28	44.2	2.77e-43
12	Immune cells	NK	NK	EIF6	0.29	36.5	2.97e-43
12	Immune cells	NK	NK	NDUFA6	0.3	41.8	3.39e-43
12	Immune cells	NK	NK	MCRIP1	0.31	31	1.09e-42
12	Immune cells	NK	NK	NUB1	0.3	40.8	1.3e-42
12	Immune cells	NK	NK	NOP10	0.27	55.5	1.33e-42
12	Immune cells	NK	NK	COPS9	0.27	55.6	1.4e-42
12	Immune cells	NK	NK	MAP1LC3B	0.32	43.1	1.63e-42
12	Immune cells	NK	NK	EIF5A	0.27	58.8	1.76e-42
12	Immune cells	NK	NK	GTF3A	0.26	60.3	2.03e-42
12	Immune cells	NK	NK	MEGF9	-0.3	7.6	2.16e-42
12	Immune cells	NK	NK	SELENOS	0.29	30.3	4.47e-42
12	Immune cells	NK	NK	ARHGAP26	0.27	27.2	4.96e-42
12	Immune cells	NK	NK	PSMC4	0.3	31.2	5.1e-42
12	Immune cells	NK	NK	ADAM10	0.29	41.4	7.12e-42
12	Immune cells	NK	NK	ADA2	-0.27	12.5	7.43e-42
12	Immune cells	NK	NK	SRI	0.28	41.7	1.01e-41
12	Immune cells	NK	NK	DUSP6	-0.58	8.4	1.1e-41
12	Immune cells	NK	NK	RHBDF2	0.27	20.3	1.13e-41
12	Immune cells	NK	NK	CTSS	-1.37	41.4	1.24e-41
12	Immune cells	NK	NK	MRPS12	0.3	32.7	1.24e-41
12	Immune cells	NK	NK	FKBP8	0.26	55.2	1.27e-41
12	Immune cells	NK	NK	ZBTB7A	0.29	48.9	2.39e-41
12	Immune cells	NK	NK	CIAO1	0.29	27.2	2.81e-41
12	Immune cells	NK	NK	ARFGAP3	0.29	25.5	4.01e-41
12	Immune cells	NK	NK	BCAP31	0.28	46	9.12e-41
12	Immune cells	NK	NK	NBEAL2	0.25	21.5	1.46e-40
12	Immune cells	NK	NK	ARHGAP25	0.3	32.8	2.16e-40
12	Immune cells	NK	NK	UBE2E3	0.28	27.6	3.28e-40
12	Immune cells	NK	NK	RNF115	0.29	33.9	4.69e-40
12	Immune cells	NK	NK	ITPA	0.29	28	5.31e-40
12	Immune cells	NK	NK	TMCO1	0.28	42.7	5.86e-40
12	Immune cells	NK	NK	COPS6	0.29	39.9	8.79e-40
12	Immune cells	NK	NK	TCF4	-0.3	3.6	2.33e-39
12	Immune cells	NK	NK	CUTA	0.27	60.4	4.94e-39
12	Immune cells	NK	NK	TRPV2	0.27	20.7	5.22e-39
12	Immune cells	NK	NK	CDC37	0.27	48.4	7.19e-39
12	Immune cells	NK	NK	CRELD2	0.27	21.1	5.32e-38
12	Immune cells	NK	NK	ADRM1	0.29	33.8	5.38e-38
12	Immune cells	NK	NK	DDOST	0.29	35.2	6.42e-38
12	Immune cells	NK	NK	BLOC1S1	0.26	49.1	1.62e-37
12	Immune cells	NK	NK	SIRT7	0.28	33.8	1.75e-37
12	Immune cells	NK	NK	KCNAB2	0.3	28.9	2.31e-37
12	Immune cells	NK	NK	LRPAP1	0.27	38.1	4.65e-37
12	Immune cells	NK	NK	STX4	0.28	25.7	4.66e-37
12	Immune cells	NK	NK	ORAI1	0.29	39	6.15e-37
12	Immune cells	NK	NK	ILK	0.27	30.8	6.21e-37
12	Immune cells	NK	NK	LRP10	0.3	35.7	6.49e-37
12	Immune cells	NK	NK	FAM117A	0.25	24.3	6.7e-37
12	Immune cells	NK	NK	UBE2M	0.28	38	1.42e-36
12	Immune cells	NK	NK	H2AFY	-0.28	30.9	2.31e-36
12	Immune cells	NK	NK	RIN3	0.29	31.4	2.4e-36
12	Immune cells	NK	NK	PPIE	0.26	27.1	5.93e-36
12	Immune cells	NK	NK	DUSP23	0.26	22.1	6.09e-36
12	Immune cells	NK	NK	UPP1	0.29	30.8	7.45e-36
12	Immune cells	NK	NK	SH3GLB1	0.28	35.7	1.17e-35
12	Immune cells	NK	NK	SFT2D1	0.28	31.7	3.4e-35
12	Immune cells	NK	NK	NDUFB8	0.25	53.8	4.28e-35
12	Immune cells	NK	NK	C9orf78	0.26	50.6	4.91e-35
12	Immune cells	NK	NK	ANKRD11	0.26	60.5	5.8e-35
12	Immune cells	NK	NK	ARIH2	0.28	27.5	7.84e-35
12	Immune cells	NK	NK	RAB1B	0.27	26.3	1.01e-34
12	Immune cells	NK	NK	IRF3	0.26	44.4	1.81e-34
12	Immune cells	NK	NK	KAT6B	0.25	28.1	2.03e-34
12	Immune cells	NK	NK	PPM1G	0.28	42.8	5.28e-34
12	Immune cells	NK	NK	SPCS3	0.29	39.3	8.2e-34
12	Immune cells	NK	NK	RSBN1L	0.26	47.4	8.66e-34
12	Immune cells	NK	NK	ENSA	0.28	44.4	1.15e-33
12	Immune cells	NK	NK	RASA3	0.28	29.2	1.49e-33
12	Immune cells	NK	NK	STK38	0.28	38.7	2.28e-33
12	Immune cells	NK	NK	RNPS1	0.27	45.5	3.44e-33
12	Immune cells	NK	NK	TRIM22	0.26	37.4	4.9e-33
12	Immune cells	NK	NK	CNOT6L	0.3	40.8	6.94e-33
12	Immune cells	NK	NK	HSPB11	0.28	27.5	8.37e-33
12	Immune cells	NK	NK	BRD2	0.3	41.1	1.13e-32
12	Immune cells	NK	NK	ZBTB44	0.29	28.9	1.21e-32
12	Immune cells	NK	NK	RNF7	0.26	44.4	1.26e-32
12	Immune cells	NK	NK	ETFA	0.27	29.7	1.59e-32
12	Immune cells	NK	NK	NUCB1	0.28	35.1	1.74e-32
12	Immune cells	NK	NK	NCOA4	-0.27	17.8	1.96e-32
12	Immune cells	NK	NK	POLR2K	0.28	32.1	1.99e-32
12	Immune cells	NK	NK	CEBPB	-0.32	24	2.56e-32
12	Immune cells	NK	NK	CTBP1	0.28	26.8	2.86e-32
12	Immune cells	NK	NK	CYFIP2	0.25	39.3	6.08e-32
12	Immune cells	NK	NK	PHB	0.27	35.6	8.85e-32
12	Immune cells	NK	NK	PPP6R1	0.29	28.8	9.62e-32
12	Immune cells	NK	NK	PRKACB	0.28	33.7	1.03e-31
12	Immune cells	NK	NK	PPP2R5A	0.26	25.9	1.06e-31
12	Immune cells	NK	NK	PPP1R7	0.27	33.7	1.15e-31
12	Immune cells	NK	NK	RAPGEF1	0.26	21.4	1.56e-31
12	Immune cells	NK	NK	GPAA1	0.26	23.4	2.83e-31
12	Immune cells	NK	NK	SUGP2	0.27	28.9	6.29e-31
12	Immune cells	NK	NK	CYBC1	0.27	35.5	9.11e-31
12	Immune cells	NK	NK	CHD9	0.25	33.3	5.26e-30
12	Immune cells	NK	NK	TUBB	0.29	44.4	5.74e-30
12	Immune cells	NK	NK	VSIR	-0.25	36.2	5.82e-30
12	Immune cells	NK	NK	TEX264	0.28	31.5	1.02e-29
12	Immune cells	NK	NK	ACP1	0.26	40.1	1.28e-29
12	Immune cells	NK	NK	KRTCAP2	0.26	39.1	2.46e-29
12	Immune cells	NK	NK	NCOA7	0.25	26.5	7.05e-29
12	Immune cells	NK	NK	PSMB2	0.26	36	1.06e-28
12	Immune cells	NK	NK	PTPN2	0.27	38.8	1.2e-28
12	Immune cells	NK	NK	NAA38	0.26	42.4	1.41e-28
12	Immune cells	NK	NK	PSMD13	0.26	37.9	3.72e-28
12	Immune cells	NK	NK	LSM3	0.26	40.3	6.12e-28
12	Immune cells	NK	NK	HIST1H1E	0.28	34.9	6.19e-28
12	Immune cells	NK	NK	ADH5	0.26	38.1	1.41e-27
12	Immune cells	NK	NK	DAXX	0.27	29	1.45e-27
12	Immune cells	NK	NK	CCDC167	0.26	25.1	2.54e-27
12	Immune cells	NK	NK	SRP19	0.27	36.9	8.94e-27
12	Immune cells	NK	NK	BCL9L	0.26	32.4	1.35e-26
12	Immune cells	NK	NK	VPS4B	0.26	37.8	1.58e-26
12	Immune cells	NK	NK	TMEM179B	0.27	30.4	4.71e-26
12	Immune cells	NK	NK	UFD1	0.26	30.2	5.17e-26
12	Immune cells	NK	NK	RER1	0.27	37.2	5.4e-26
12	Immune cells	NK	NK	PUF60	0.25	36	1.49e-25
12	Immune cells	NK	NK	CYC1	0.26	31.8	3.15e-25
12	Immune cells	NK	NK	NRBP1	0.26	28.9	8.19e-25
12	Immune cells	NK	NK	PLPP5	-0.25	5.7	1.1e-24
12	Immune cells	NK	NK	SLK	0.27	26.9	2.11e-24
12	Immune cells	NK	NK	TNFSF12	0.25	29.8	3.64e-23
12	Immune cells	NK	NK	ZBTB8OS	0.25	29.7	8.54e-23
12	Immune cells	NK	NK	SLC2A3	-0.34	22.6	2.64e-21
12	Immune cells	NK	NK	FGL2	-0.51	18	3.16e-19
12	Immune cells	NK	NK	APLP2	-0.44	28.9	6.12e-18
12	Immune cells	NK	NK	TIMP1	0.26	39.4	5.14e-17
12	Immune cells	NK	NK	TSPO	-0.35	58.6	1.36e-10
12	Immune cells	NK	NK	STXBP2	-0.27	24.5	1.86e-10
12	Immune cells	NK	NK	IL32	0.34	56.2	2.07e-08
12	Immune cells	NK	NK	S100A10	-0.3	72.9	3.72e-08
12	Immune cells	NK	NK	SAT1	-0.33	50.5	1.47e-06
21	Immune cells	NK	NK	ZMAT4	0.46	10.1	4.56e-120
21	Immune cells	NK	NK	MT-CO2	1	100	4.12e-115
21	Immune cells	NK	NK	MT-CO3	0.91	100	6.99e-105
21	Immune cells	NK	NK	MT-ATP6	0.88	100	3.54e-103
21	Immune cells	NK	NK	MALAT1	0.78	100	2.41e-98
21	Immune cells	NK	NK	MT-CYB	0.71	100	3.03e-78
21	Immune cells	NK	NK	MT-ND4	0.65	100	1.61e-69
21	Immune cells	NK	NK	ATP5MC2	-1.02	21.9	9.27e-66
21	Immune cells	NK	NK	OST4	-1	13.6	2.42e-65
21	Immune cells	NK	NK	YBX1	-0.94	28.9	1.7e-60
21	Immune cells	NK	NK	COMMD6	-0.93	18.4	4.08e-60
21	Immune cells	NK	NK	ATP5MG	-0.9	26.3	3.83e-59
21	Immune cells	NK	NK	PTMA	-0.65	77.6	2.54e-54
21	Immune cells	NK	NK	ATP5F1E	-0.79	54.8	2.88e-54
21	Immune cells	NK	NK	ATP6V1G1	-0.79	12.7	1.26e-52
21	Immune cells	NK	NK	ATP5PO	-0.84	7	3.33e-52
21	Immune cells	NK	NK	UQCRH	-0.8	14	1.95e-48
21	Immune cells	NK	NK	OAZ1	-0.99	35.5	1.83e-47
21	Immune cells	NK	NK	H3F3A	-0.74	57.5	5.43e-45
21	Immune cells	NK	NK	TMSB10	-0.57	85.5	2.96e-44
21	Immune cells	NK	NK	SLC25A5	-0.78	6.6	1.2e-43
21	Immune cells	NK	NK	COX7A2	-0.72	10.1	2.19e-43
21	Immune cells	NK	NK	EIF3F	-0.68	22.8	4.77e-41
21	Immune cells	NK	NK	CD48	-0.72	31.6	8.12e-40
21	Immune cells	NK	NK	EIF3K	-0.68	29.8	1.78e-39
21	Immune cells	NK	NK	S100A6	-1.31	35.1	6.22e-39
21	Immune cells	NK	NK	COX6C	-0.66	20.6	1.55e-38
21	Immune cells	NK	NK	NDUFA4	-0.64	16.7	2.34e-38
21	Immune cells	NK	NK	ITM2B	-0.65	38.2	1.22e-37
21	Immune cells	NK	NK	SKP1	-0.61	22.4	1.32e-37
21	Immune cells	NK	NK	PRDX1	-0.71	3.1	1.69e-37
21	Immune cells	NK	NK	HIGD2A	-0.66	11.4	3.38e-37
21	Immune cells	NK	NK	ATP5PD	-0.66	6.6	2.91e-36
21	Immune cells	NK	NK	NEAT1	0.61	94.3	3.01e-36
21	Immune cells	NK	NK	DDX17	0.69	83.3	3.86e-36
21	Immune cells	NK	NK	CNBP	-0.59	20.2	5.88e-36
21	Immune cells	NK	NK	SOD1	-0.59	14	7.08e-35
21	Immune cells	NK	NK	PTGES3	-0.51	13.6	4.61e-34
21	Immune cells	NK	NK	CALM2	-0.65	19.3	1.33e-33
21	Immune cells	NK	NK	SUMO2	-0.55	23.7	1.81e-33
21	Immune cells	NK	NK	RTRAF	-0.53	6.6	1.18e-32
21	Immune cells	NK	NK	COX6B1	-0.56	22.8	3.15e-32
21	Immune cells	NK	NK	GNG5	-0.62	8.3	6.49e-32
21	Immune cells	NK	NK	RSL24D1	-0.58	7	1.07e-31
21	Immune cells	NK	NK	ISCU	-0.54	9.2	1.55e-31
21	Immune cells	NK	NK	COX7A2L	-0.56	8.3	3.75e-31
21	Immune cells	NK	NK	SPCS1	-0.5	11.8	1.14e-30
21	Immune cells	NK	NK	PPDPF	-0.57	31.1	1.29e-30
21	Immune cells	NK	NK	DDT	-0.57	7	2.51e-30
21	Immune cells	NK	NK	PGK1	-0.56	13.6	6.77e-30
21	Immune cells	NK	NK	SNRPD2	-0.51	22.4	7.85e-30
21	Immune cells	NK	NK	TBCA	-0.54	11.8	1.06e-29
21	Immune cells	NK	NK	KRT10	-0.53	5.7	4.21e-29
21	Immune cells	NK	NK	GMFG	-0.51	32.5	4.73e-29
21	Immune cells	NK	NK	H2AFZ	-0.5	11.8	5.3e-29
21	Immune cells	NK	NK	ATP6V1F	-0.56	7	6.01e-29
21	Immune cells	NK	NK	GABARAPL2	-0.51	5.7	7.86e-29
21	Immune cells	NK	NK	SH3BGRL	-0.58	11	1.03e-28
21	Immune cells	NK	NK	ANAPC16	-0.44	19.3	2.71e-28
21	Immune cells	NK	NK	APRT	-0.45	23.7	3.59e-28
21	Immune cells	NK	NK	PHB2	-0.48	7.5	6.09e-28
21	Immune cells	NK	NK	NDUFB4	-0.49	7.5	9.09e-28
21	Immune cells	NK	NK	NDUFS5	-0.49	12.3	1.06e-27
21	Immune cells	NK	NK	TRMT112	-0.45	12.3	1.28e-27
21	Immune cells	NK	NK	C4orf3	-0.42	12.3	2.08e-27
21	Immune cells	NK	NK	CSTB	-0.61	8.8	2.41e-27
21	Immune cells	NK	NK	RAN	-0.42	18.9	3.22e-27
21	Immune cells	NK	NK	C1QBP	-0.41	7.5	8.96e-27
21	Immune cells	NK	NK	MINOS1	-0.47	6.6	1.63e-26
21	Immune cells	NK	NK	HNRNPA1	-0.46	38.6	1.74e-26
21	Immune cells	NK	NK	ATP5MPL	-0.42	17.1	1.87e-26
21	Immune cells	NK	NK	SNU13	-0.39	11.8	2.46e-26
21	Immune cells	NK	NK	FKBP1A	-0.57	8.3	2.59e-26
21	Immune cells	NK	NK	MZT2B	-0.48	23.7	3.81e-26
21	Immune cells	NK	NK	SLC25A3	-0.45	22.4	4.58e-26
21	Immune cells	NK	NK	HSP90AB1	-0.47	35.5	7.44e-26
21	Immune cells	NK	NK	RPL17	-0.47	14.9	8.51e-26
21	Immune cells	NK	NK	ATP5MD	-0.48	11	9.07e-26
21	Immune cells	NK	NK	S100A11	-1.08	17.5	1.65e-25
21	Immune cells	NK	NK	DYNLRB1	-0.47	5.3	1.71e-25
21	Immune cells	NK	NK	ZNF706	-0.44	10.1	3.3e-25
21	Immune cells	NK	NK	SRP9	-0.37	11	3.96e-25
21	Immune cells	NK	NK	UBE2D2	-0.37	19.7	1.75e-24
21	Immune cells	NK	NK	NDUFB11	-0.42	17.1	1.84e-24
21	Immune cells	NK	NK	ATP5PB	-0.41	10.1	2.11e-24
21	Immune cells	NK	NK	C19orf53	-0.44	18	3.1e-24
21	Immune cells	NK	NK	SF3B6	-0.44	4.8	5.39e-24
21	Immune cells	NK	NK	ABRACL	-0.43	12.7	6.38e-24
21	Immune cells	NK	NK	GDI2	-0.49	10.5	6.67e-24
21	Immune cells	NK	NK	EIF3M	-0.39	14.9	7.11e-24
21	Immune cells	NK	NK	TMEM14B	-0.42	5.7	1.1e-23
21	Immune cells	NK	NK	PRDX2	-0.5	7.9	3.38e-23
21	Immune cells	NK	NK	UBXN1	-0.37	20.6	5.24e-23
21	Immune cells	NK	NK	MGST3	-0.48	4.4	6.79e-23
21	Immune cells	NK	NK	PRDX6	-0.44	8.8	8.82e-23
21	Immune cells	NK	NK	LSM5	-0.42	3.9	1.46e-22
21	Immune cells	NK	NK	C8orf59	-0.37	10.5	1.57e-22
21	Immune cells	NK	NK	TNFAIP8	-0.39	14	1.58e-22
21	Immune cells	NK	NK	SNX3	-0.44	12.3	2.2e-22
21	Immune cells	NK	NK	RAC1	-0.54	16.7	4.35e-22
21	Immune cells	NK	NK	SEC62	-0.37	19.3	4.81e-22
21	Immune cells	NK	NK	GHITM	-0.39	7.5	5.62e-22
21	Immune cells	NK	NK	EIF1	-0.35	79.8	9.64e-22
21	Immune cells	NK	NK	HMGN2	-0.4	20.6	1.76e-21
21	Immune cells	NK	NK	OCIAD2	-0.5	3.1	1.85e-21
21	Immune cells	NK	NK	LDHA	-0.36	12.7	2.43e-21
21	Immune cells	NK	NK	APEX1	-0.34	9.6	4.53e-21
21	Immune cells	NK	NK	HMGN1	-0.38	22.8	4.74e-21
21	Immune cells	NK	NK	LAMTOR5	-0.36	8.8	7.65e-21
21	Immune cells	NK	NK	PGAM1	-0.4	9.2	9.02e-21
21	Immune cells	NK	NK	LSM7	-0.29	14	1.26e-20
21	Immune cells	NK	NK	NDUFAB1	-0.39	4.8	1.55e-20
21	Immune cells	NK	NK	METTL9	-0.42	6.6	2.13e-20
21	Immune cells	NK	NK	CLNS1A	-0.38	6.6	2.2e-20
21	Immune cells	NK	NK	TMEM219	-0.41	6.1	2.33e-20
21	Immune cells	NK	NK	EID1	-0.36	15.4	2.82e-20
21	Immune cells	NK	NK	HEBP2	-0.42	4.4	3.19e-20
21	Immune cells	NK	NK	RBX1	-0.32	12.3	3.69e-20
21	Immune cells	NK	NK	NDUFB3	-0.36	5.7	5.85e-20
21	Immune cells	NK	NK	HSPB1	-0.5	3.5	5.99e-20
21	Immune cells	NK	NK	NDUFV2	-0.33	8.3	6.84e-20
21	Immune cells	NK	NK	ARHGEF12	0.39	10.5	7.32e-20
21	Immune cells	NK	NK	SNRPF	-0.29	10.1	1.19e-19
21	Immune cells	NK	NK	UQCRFS1	-0.33	5.7	1.3e-19
21	Immune cells	NK	NK	PYURF	-0.28	7	1.96e-19
21	Immune cells	NK	NK	NDUFB1	-0.36	9.2	1.99e-19
21	Immune cells	NK	NK	TXN	-0.47	3.9	2.05e-19
21	Immune cells	NK	NK	EIF3D	-0.28	16.7	2.05e-19
21	Immune cells	NK	NK	ERH	-0.3	11	2.73e-19
21	Immune cells	NK	NK	SMIM26	-0.34	7.9	4.83e-19
21	Immune cells	NK	NK	SSBP1	-0.29	14	6.29e-19
21	Immune cells	NK	NK	IGBP1	-0.38	5.7	7.11e-19
21	Immune cells	NK	NK	NDUFB5	-0.38	4.4	7.96e-19
21	Immune cells	NK	NK	NDUFB9	-0.33	11	9.08e-19
21	Immune cells	NK	NK	ATP5F1C	-0.31	8.3	1.04e-18
21	Immune cells	NK	NK	SF3B5	-0.3	12.7	1.06e-18
21	Immune cells	NK	NK	COX7B	-0.29	14	1.41e-18
21	Immune cells	NK	NK	LAMTOR1	-0.4	11.8	1.44e-18
21	Immune cells	NK	NK	ARL6IP5	-0.32	25	1.52e-18
21	Immune cells	NK	NK	MRPL20	-0.26	12.3	1.94e-18
21	Immune cells	NK	NK	SIVA1	-0.32	6.6	2.39e-18
21	Immune cells	NK	NK	NDUFC1	-0.31	7.5	2.53e-18
21	Immune cells	NK	NK	TMEM258	-0.26	18.9	2.67e-18
21	Immune cells	NK	NK	COX14	-0.32	7.9	2.93e-18
21	Immune cells	NK	NK	HSPE1	-0.3	11.4	3.03e-18
21	Immune cells	NK	NK	ARPC1B	-0.37	29.8	3.18e-18
21	Immune cells	NK	NK	VDAC2	-0.3	8.3	3.54e-18
21	Immune cells	NK	NK	PSIP1	-0.35	14.9	3.57e-18
21	Immune cells	NK	NK	COX5B	-0.33	26.3	4.26e-18
21	Immune cells	NK	NK	GSTO1	-0.4	7.9	5.18e-18
21	Immune cells	NK	NK	TUBA4A	-0.38	9.2	5.26e-18
21	Immune cells	NK	NK	LAMTOR4	-0.36	21.5	6.65e-18
21	Immune cells	NK	NK	NOL7	-0.3	8.3	7.28e-18
21	Immune cells	NK	NK	CSDE1	-0.3	18.9	1e-17
21	Immune cells	NK	NK	SUMO1	-0.25	8.8	1.29e-17
21	Immune cells	NK	NK	TOMM22	-0.31	5.7	1.77e-17
21	Immune cells	NK	NK	RWDD1	-0.31	11	1.79e-17
21	Immune cells	NK	NK	TRBC2	-0.66	27.2	1.98e-17
21	Immune cells	NK	NK	PSMA2	-0.37	1.3	2.65e-17
21	Immune cells	NK	NK	OSTC	-0.26	7	2.7e-17
21	Immune cells	NK	NK	NECAP2	-0.31	6.1	2.81e-17
21	Immune cells	NK	NK	CRIP1	-0.44	8.3	3.1e-17
21	Immune cells	NK	NK	TAF10	-0.27	14	4.46e-17
21	Immune cells	NK	NK	HSD17B11	-0.34	3.9	5.54e-17
21	Immune cells	NK	NK	TMEM256	-0.37	3.5	6.01e-17
21	Immune cells	NK	NK	RPL22L1	-0.34	5.7	6.11e-17
21	Immune cells	NK	NK	DUT	-0.3	7	8.88e-17
21	Immune cells	NK	NK	PSMB4	-0.29	8.8	9.75e-17
21	Immune cells	NK	NK	TSC22D3	-0.3	25.9	1.05e-16
21	Immune cells	NK	NK	ATP6V0B	-0.41	9.6	1.28e-16
21	Immune cells	NK	NK	CAMLG	-0.34	5.3	1.5e-16
21	Immune cells	NK	NK	GSTK1	-0.26	25	2.71e-16
21	Immune cells	NK	NK	LSM4	-0.27	6.6	3.63e-16
21	Immune cells	NK	NK	MDH2	-0.27	10.1	3.8e-16
21	Immune cells	NK	NK	SNRPN	-0.31	7	5.12e-16
21	Immune cells	NK	NK	CCT4	-0.28	10.1	5.69e-16
21	Immune cells	NK	NK	UBE2R2	-0.31	7	8.13e-16
21	Immune cells	NK	NK	CORO1B	-0.37	3.1	8.29e-16
21	Immune cells	NK	NK	MRPS21	-0.26	10.5	8.5e-16
21	Immune cells	NK	NK	DGUOK	-0.27	7.9	9.36e-16
21	Immune cells	NK	NK	MRPL41	-0.29	7.9	1.02e-15
21	Immune cells	NK	NK	TMEM230	-0.3	7.5	1.11e-15
21	Immune cells	NK	NK	POLE4	-0.35	3.9	1.18e-15
21	Immune cells	NK	NK	ATRAID	-0.27	7	1.24e-15
21	Immune cells	NK	NK	MARCKSL1	-0.42	3.1	1.32e-15
21	Immune cells	NK	NK	SERPINB1	-0.33	14	1.62e-15
21	Immune cells	NK	NK	LSM2	-0.27	3.5	1.77e-15
21	Immune cells	NK	NK	TXNL4A	-0.29	9.2	2.21e-15
21	Immune cells	NK	NK	SVIP	-0.39	3.1	2.31e-15
21	Immune cells	NK	NK	APH1A	-0.28	3.1	2.68e-15
21	Immune cells	NK	NK	NDUFAF3	-0.3	6.6	2.88e-15
21	Immune cells	NK	NK	SNRPD1	-0.29	7	3.17e-15
21	Immune cells	NK	NK	AAK1	0.67	63.6	3.31e-15
21	Immune cells	NK	NK	ZFP36	-0.33	14	1.24e-14
21	Immune cells	NK	NK	EIF1AY	-0.33	3.9	1.44e-14
21	Immune cells	NK	NK	ATP1A1	-0.26	8.3	1.52e-14
21	Immune cells	NK	NK	EMC4	-0.3	1.8	1.6e-14
21	Immune cells	NK	NK	CNIH1	-0.33	0.9	1.85e-14
21	Immune cells	NK	NK	FAM200B	-0.28	4.4	1.85e-14
21	Immune cells	NK	NK	MZT2A	-0.27	15.4	2.26e-14
21	Immune cells	NK	NK	N4BP2L2	0.53	72.4	2.27e-14
21	Immune cells	NK	NK	NIFK	-0.32	4.8	2.36e-14
21	Immune cells	NK	NK	ISG20	-0.27	18	2.37e-14
21	Immune cells	NK	NK	MRPS33	-0.35	2.2	2.9e-14
21	Immune cells	NK	NK	VPS35	-0.25	8.3	4.11e-14
21	Immune cells	NK	NK	SUPT4H1	-0.3	4.4	4.12e-14
21	Immune cells	NK	NK	AP2S1	-0.31	14	4.39e-14
21	Immune cells	NK	NK	PNRC1	-0.31	40.4	5.08e-14
21	Immune cells	NK	NK	MRPL43	-0.3	3.5	5.23e-14
21	Immune cells	NK	NK	NBDY	-0.33	3.5	6.59e-14
21	Immune cells	NK	NK	ILF2	-0.25	6.6	7.86e-14
21	Immune cells	NK	NK	GAPDH	-0.49	47.8	1.16e-13
21	Immune cells	NK	NK	RILPL2	-0.37	3.1	1.24e-13
21	Immune cells	NK	NK	EPB41L4A-AS1	-0.31	3.9	1.35e-13
21	Immune cells	NK	NK	SMIM37	-0.3	2.6	1.44e-13
21	Immune cells	NK	NK	MRPL3	-0.3	1.3	2.09e-13
21	Immune cells	NK	NK	IMPDH2	-0.31	2.2	2.27e-13
21	Immune cells	NK	NK	MBNL1	0.53	68	2.59e-13
21	Immune cells	NK	NK	CNPY3	-0.27	10.5	3.31e-13
21	Immune cells	NK	NK	STMN1	-0.4	1.3	3.68e-13
21	Immune cells	NK	NK	ARPC5	-0.31	34.2	5.32e-13
21	Immune cells	NK	NK	TAGLN2	-0.34	26.8	6.1e-13
21	Immune cells	NK	NK	ADI1	-0.3	3.5	8.69e-13
21	Immune cells	NK	NK	EMC6	-0.27	3.1	9.59e-13
21	Immune cells	NK	NK	OLA1	-0.26	3.1	1.23e-12
21	Immune cells	NK	NK	NSMCE1	-0.25	3.1	1.43e-12
21	Immune cells	NK	NK	NENF	-0.25	2.2	1.62e-12
21	Immune cells	NK	NK	C14orf119	-0.26	2.6	1.81e-12
21	Immune cells	NK	NK	DNAJC19	-0.26	4.8	2.05e-12
21	Immune cells	NK	NK	DRAM2	-0.3	1.8	2.77e-12
21	Immune cells	NK	NK	ANAPC15	-0.29	1.8	3.51e-12
21	Immune cells	NK	NK	CCDC59	-0.28	3.5	3.97e-12
21	Immune cells	NK	NK	LUC7L3	0.61	65.4	4.97e-12
21	Immune cells	NK	NK	PECAM1	-0.34	3.5	5.21e-12
21	Immune cells	NK	NK	CAT	-0.27	4.8	6.33e-12
21	Immune cells	NK	NK	RSRP1	0.65	62.3	8.7e-12
21	Immune cells	NK	NK	GNAI2	-0.29	36.8	1.1e-11
21	Immune cells	NK	NK	ZNF207	0.71	58.3	1.55e-11
21	Immune cells	NK	NK	FCMR	-0.29	15.4	2.58e-11
21	Immune cells	NK	NK	DPY30	-0.26	2.6	3.08e-11
21	Immune cells	NK	NK	HMGB2	-0.29	11.4	3.52e-11
21	Immune cells	NK	NK	MT1X	-0.29	0.9	4.96e-11
21	Immune cells	NK	NK	TMEM204	-0.27	3.5	5.08e-11
21	Immune cells	NK	NK	CASP1	-0.29	5.7	8.67e-11
21	Immune cells	NK	NK	PNN	0.62	62.7	9e-11
21	Immune cells	NK	NK	SELENOM	-0.27	1.3	9.13e-11
21	Immune cells	NK	NK	MID1IP1	-0.26	1.3	1.65e-10
21	Immune cells	NK	NK	SGTB	-0.28	0.4	2.26e-10
21	Immune cells	NK	NK	CTSA	-0.26	5.3	2.45e-10
21	Immune cells	NK	NK	UBE2D1	-0.29	2.2	3.44e-10
21	Immune cells	NK	NK	PYCARD	-0.31	13.6	3.59e-10
21	Immune cells	NK	NK	AHNAK	0.62	57	3.64e-10
21	Immune cells	NK	NK	NKTR	0.69	57.5	4.01e-10
21	Immune cells	NK	NK	IKZF1	0.56	68	5.11e-10
21	Immune cells	NK	NK	PIM3	-0.25	1.8	6.59e-10
21	Immune cells	NK	NK	PIM2	-0.27	1.8	9.99e-10
21	Immune cells	NK	NK	HEXB	-0.26	1.8	1.17e-09
21	Immune cells	NK	NK	ASAP1	-0.27	2.2	1.37e-09
21	Immune cells	NK	NK	RTN3	-0.25	5.7	1.49e-09
21	Immune cells	NK	NK	ASAH1	-0.27	12.3	1.55e-09
21	Immune cells	NK	NK	PAK1	-0.29	0	4.44e-09
21	Immune cells	NK	NK	GSE1	0.57	18.9	9.92e-09
21	Immune cells	NK	NK	HHEX	-0.27	0.9	1.03e-08
21	Immune cells	NK	NK	ARGLU1	0.61	61	1.39e-08
21	Immune cells	NK	NK	ANKRD44	0.6	57	1.61e-08
21	Immune cells	NK	NK	EIF4EBP1	-0.25	0.4	1.75e-08
21	Immune cells	NK	NK	TRBC1	-0.61	21.9	2.07e-08
21	Immune cells	NK	NK	CD79B	-0.58	4.4	2.63e-08
21	Immune cells	NK	NK	IFT57	-0.26	0.4	3.79e-08
21	Immune cells	NK	NK	SULF2	-0.26	0	3.95e-08
21	Immune cells	NK	NK	SH3BP2	0.66	32	4.87e-08
21	Immune cells	NK	NK	SRRM2	0.52	61.8	7.44e-08
21	Immune cells	NK	NK	SLC43A2	-0.25	0	8.12e-08
21	Immune cells	NK	NK	KAT2B	0.6	15.4	2.34e-07
21	Immune cells	NK	NK	PLCG2	0.77	31.1	5.3e-07
21	Immune cells	NK	NK	PADI4	-0.25	0	6.07e-07
21	Immune cells	NK	NK	NFAT5	0.71	25.4	1.1e-06
21	Immune cells	NK	NK	CCDC88B	0.79	30.3	1.3e-06
21	Immune cells	NK	NK	RHOB	-0.25	0.9	1.45e-06
21	Immune cells	NK	NK	ATP8B4	0.41	10.1	1.64e-06
21	Immune cells	NK	NK	MIAT	0.59	17.1	2.27e-06
21	Immune cells	NK	NK	OGT	0.66	39.5	2.61e-06
21	Immune cells	NK	NK	CDK13	0.69	46.1	2.9e-06
21	Immune cells	NK	NK	ETS1	0.53	55.7	3.1e-06
21	Immune cells	NK	NK	POLR2J3.1	0.52	61.8	3.13e-06
21	Immune cells	NK	NK	TRIM56	0.68	43.9	5.32e-06
21	Immune cells	NK	NK	RBM25	0.55	57.5	5.96e-06
24	Immune cells	NK	NK	MKI67	1.82	82.7	0
24	Immune cells	NK	NK	TYMS	1.58	80	0
24	Immune cells	NK	NK	CENPF	1.43	71.8	0
24	Immune cells	NK	NK	TOP2A	1.35	66.4	0
24	Immune cells	NK	NK	PCLAF	1.33	75.5	0
24	Immune cells	NK	NK	PTTG1	1.32	63.6	0
24	Immune cells	NK	NK	RRM2	1.1	60	0
24	Immune cells	NK	NK	BIRC5	1.07	64.5	0
24	Immune cells	NK	NK	ASPM	1.05	60	0
24	Immune cells	NK	NK	NUSAP1	1.03	60.9	0
24	Immune cells	NK	NK	TK1	1.02	62.7	0
24	Immune cells	NK	NK	CLSPN	0.96	66.4	0
24	Immune cells	NK	NK	TPX2	0.94	60	0
24	Immune cells	NK	NK	CENPE	0.9	61.8	0
24	Immune cells	NK	NK	CDT1	0.9	65.5	0
24	Immune cells	NK	NK	CENPM	0.88	70	0
24	Immune cells	NK	NK	FAM111B	0.86	58.2	0
24	Immune cells	NK	NK	UBE2C	0.84	49.1	0
24	Immune cells	NK	NK	HMMR	0.81	49.1	0
24	Immune cells	NK	NK	GINS2	0.81	67.3	0
24	Immune cells	NK	NK	MCM4	0.79	62.7	0
24	Immune cells	NK	NK	CDKN3	0.72	58.2	0
24	Immune cells	NK	NK	ZWINT	0.71	65.5	0
24	Immune cells	NK	NK	KNL1	0.71	53.6	0
24	Immune cells	NK	NK	CCNB2	0.71	50.9	0
24	Immune cells	NK	NK	GMNN	0.69	63.6	0
24	Immune cells	NK	NK	FANCI	0.68	65.5	0
24	Immune cells	NK	NK	CDC20	0.67	39.1	0
24	Immune cells	NK	NK	CHEK1	0.66	60.9	0
24	Immune cells	NK	NK	CDCA7	0.65	49.1	0
24	Immune cells	NK	NK	CCNB1	0.65	37.3	0
24	Immune cells	NK	NK	ASF1B	0.64	57.3	0
24	Immune cells	NK	NK	ORC6	0.63	61.8	0
24	Immune cells	NK	NK	GTSE1	0.63	46.4	0
24	Immune cells	NK	NK	MYBL2	0.61	47.3	0
24	Immune cells	NK	NK	NDC80	0.59	48.2	0
24	Immune cells	NK	NK	KIFC1	0.59	51.8	0
24	Immune cells	NK	NK	CDK1	0.59	35.5	0
24	Immune cells	NK	NK	CENPU	0.58	54.5	0
24	Immune cells	NK	NK	E2F1	0.56	53.6	0
24	Immune cells	NK	NK	MCM2	0.55	55.5	0
24	Immune cells	NK	NK	UBE2T	0.55	58.2	0
24	Immune cells	NK	NK	DLGAP5	0.54	49.1	0
24	Immune cells	NK	NK	CCNA2	0.54	48.2	0
24	Immune cells	NK	NK	HMGB3	0.52	49.1	0
24	Immune cells	NK	NK	TROAP	0.5	41.8	0
24	Immune cells	NK	NK	UHRF1	0.49	55.5	0
24	Immune cells	NK	NK	CENPN	0.49	58.2	0
24	Immune cells	NK	NK	KIF11	0.48	44.5	0
24	Immune cells	NK	NK	NCAPG	0.48	39.1	0
24	Immune cells	NK	NK	CEP55	0.48	41.8	0
24	Immune cells	NK	NK	NUF2	0.47	40	0
24	Immune cells	NK	NK	BUB1	0.45	49.1	0
24	Immune cells	NK	NK	KIF15	0.45	42.7	0
24	Immune cells	NK	NK	AC007240.1	0.45	32.7	0
24	Immune cells	NK	NK	SPC24	0.42	47.3	0
24	Immune cells	NK	NK	CDCA8	0.42	40	0
24	Immune cells	NK	NK	PKMYT1	0.41	40.9	0
24	Immune cells	NK	NK	AURKB	0.41	34.5	0
24	Immune cells	NK	NK	KIF14	0.4	31.8	0
24	Immune cells	NK	NK	PAQR4	0.4	48.2	0
24	Immune cells	NK	NK	CDC6	0.39	43.6	0
24	Immune cells	NK	NK	SGO1	0.39	45.5	0
24	Immune cells	NK	NK	E2F2	0.39	42.7	0
24	Immune cells	NK	NK	KIF2C	0.39	36.4	0
24	Immune cells	NK	NK	CDC45	0.39	42.7	0
24	Immune cells	NK	NK	ESCO2	0.37	35.5	0
24	Immune cells	NK	NK	CKAP2L	0.37	35.5	0
24	Immune cells	NK	NK	MCM10	0.37	40.9	0
24	Immune cells	NK	NK	DIAPH3	0.37	39.1	0
24	Immune cells	NK	NK	PLK1	0.37	31.8	0
24	Immune cells	NK	NK	CDCA5	0.37	45.5	0
24	Immune cells	NK	NK	RAD51AP1	0.36	39.1	0
24	Immune cells	NK	NK	SHCBP1	0.36	44.5	0
24	Immune cells	NK	NK	FOXM1	0.35	38.2	0
24	Immune cells	NK	NK	CENPA	0.35	29.1	0
24	Immune cells	NK	NK	DTL	0.33	35.5	0
24	Immune cells	NK	NK	E2F8	0.33	30.9	0
24	Immune cells	NK	NK	ARHGAP11A	0.33	37.3	0
24	Immune cells	NK	NK	CDCA2	0.31	33.6	0
24	Immune cells	NK	NK	CTNNAL1	0.31	38.2	0
24	Immune cells	NK	NK	SPC25	0.31	36.4	0
24	Immune cells	NK	NK	MND1	0.31	39.1	0
24	Immune cells	NK	NK	CDCA3	0.3	31.8	0
24	Immune cells	NK	NK	GGH	0.3	39.1	0
24	Immune cells	NK	NK	XRCC2	0.3	36.4	0
24	Immune cells	NK	NK	KIF23	0.3	30	0
24	Immune cells	NK	NK	C2orf48	0.29	21.8	0
24	Immune cells	NK	NK	NCAPH	0.29	40	0
24	Immune cells	NK	NK	MELK	0.29	27.3	0
24	Immune cells	NK	NK	SKA3	0.29	32.7	0
24	Immune cells	NK	NK	HJURP	0.28	30	0
24	Immune cells	NK	NK	DEPDC1B	0.27	37.3	0
24	Immune cells	NK	NK	BRIP1	0.27	37.3	0
24	Immune cells	NK	NK	BUB1B	0.27	30.9	0
24	Immune cells	NK	NK	AURKA	0.38	34.5	1.39e-305
24	Immune cells	NK	NK	RPL39L	0.56	56.4	2.6e-305
24	Immune cells	NK	NK	BRCA2	0.53	54.5	1.01e-292
24	Immune cells	NK	NK	BRCA1	0.66	52.7	1.83e-280
24	Immune cells	NK	NK	WEE1	0.39	45.5	1.46e-264
24	Immune cells	NK	NK	FEN1	0.72	64.5	9.39e-264
24	Immune cells	NK	NK	MAD2L1	0.71	70.9	9.84e-261
24	Immune cells	NK	NK	CENPW	0.51	54.5	3.22e-256
24	Immune cells	NK	NK	HIST1H2BH	0.3	34.5	2.05e-243
24	Immune cells	NK	NK	ECT2	0.26	36.4	3.9e-242
24	Immune cells	NK	NK	ACOT7	0.29	42.7	1.21e-235
24	Immune cells	NK	NK	EZH2	0.76	68.2	8.76e-235
24	Immune cells	NK	NK	TIMELESS	0.32	42.7	8.67e-229
24	Immune cells	NK	NK	CDKN2A	0.27	32.7	6.09e-224
24	Immune cells	NK	NK	WDR34	0.32	44.5	3.23e-221
24	Immune cells	NK	NK	MCM6	0.78	64.5	4.98e-221
24	Immune cells	NK	NK	WDHD1	0.31	36.4	1.38e-215
24	Immune cells	NK	NK	HELLS	1.06	75.5	1.82e-208
24	Immune cells	NK	NK	CIP2A	0.28	39.1	2.29e-200
24	Immune cells	NK	NK	TCF19	0.34	42.7	7.88e-199
24	Immune cells	NK	NK	NCAPG2	0.42	51.8	2.89e-196
24	Immune cells	NK	NK	WDR76	0.57	62.7	2.82e-194
24	Immune cells	NK	NK	HIST1H1B	1.08	49.1	4.97e-194
24	Immune cells	NK	NK	SGO2	0.52	49.1	1.91e-191
24	Immune cells	NK	NK	IFI27L1	0.26	45.5	7.91e-181
24	Immune cells	NK	NK	ATAD2	0.91	67.3	6.04e-158
24	Immune cells	NK	NK	RBBP8	0.35	44.5	2.12e-155
24	Immune cells	NK	NK	ATAD5	0.54	61.8	8.5e-151
24	Immune cells	NK	NK	CCDC34	0.37	47.3	6.38e-150
24	Immune cells	NK	NK	FBXO5	0.51	46.4	1.77e-147
24	Immune cells	NK	NK	SMC2	0.94	72.7	1.41e-146
24	Immune cells	NK	NK	C21orf58	0.48	43.6	1.11e-145
24	Immune cells	NK	NK	CHAF1A	0.52	55.5	6.84e-143
24	Immune cells	NK	NK	TUBG1	0.34	44.5	3.09e-142
24	Immune cells	NK	NK	MCM7	1.04	75.5	4.95e-140
24	Immune cells	NK	NK	RFC4	0.52	62.7	2.91e-137
24	Immune cells	NK	NK	H2AFX	0.89	64.5	1.05e-136
24	Immune cells	NK	NK	DHFR	0.75	69.1	1.07e-136
24	Immune cells	NK	NK	CKS2	0.74	61.8	3.53e-134
24	Immune cells	NK	NK	RACGAP1	0.26	31.8	6.88e-133
24	Immune cells	NK	NK	PCNA	1.25	76.4	9.41e-127
24	Immune cells	NK	NK	PHF19	0.82	75.5	6.19e-126
24	Immune cells	NK	NK	MCM5	0.89	75.5	4.69e-125
24	Immune cells	NK	NK	CENPH	0.43	54.5	5.14e-125
24	Immune cells	NK	NK	FANCD2	0.31	42.7	4.09e-124
24	Immune cells	NK	NK	PXMP2	0.3	44.5	1.84e-123
24	Immune cells	NK	NK	KPNA2	0.69	63.6	1.42e-122
24	Immune cells	NK	NK	NCAPD2	0.6	67.3	3.51e-120
24	Immune cells	NK	NK	CKS1B	0.74	70.9	4.14e-119
24	Immune cells	NK	NK	SMC4	1.26	78.2	1.44e-113
24	Immune cells	NK	NK	PRR11	0.26	30.9	6.12e-110
24	Immune cells	NK	NK	LIG1	0.53	62.7	3.68e-107
24	Immune cells	NK	NK	TCTEX1D2	0.27	43.6	7.1e-107
24	Immune cells	NK	NK	KNTC1	0.26	34.5	7.6e-106
24	Immune cells	NK	NK	RRM1	0.68	61.8	1.02e-105
24	Immune cells	NK	NK	FANCA	0.33	40	2.77e-105
24	Immune cells	NK	NK	TMEM106C	0.67	63.6	1.32e-104
24	Immune cells	NK	NK	BARD1	0.43	53.6	1.19e-103
24	Immune cells	NK	NK	CDKN2C	0.32	38.2	5.33e-101
24	Immune cells	NK	NK	MT1E	0.27	24.5	2.37e-96
24	Immune cells	NK	NK	SPDL1	0.36	39.1	5.79e-96
24	Immune cells	NK	NK	LRR1	0.3	45.5	1.19e-95
24	Immune cells	NK	NK	MCM3	1.03	77.3	6.69e-95
24	Immune cells	NK	NK	UNG	0.48	44.5	5.69e-94
24	Immune cells	NK	NK	NCAPD3	0.47	60	3.12e-92
24	Immune cells	NK	NK	DNAJC9	0.68	72.7	5.86e-89
24	Immune cells	NK	NK	MIR4435-2HG	0.44	54.5	6.69e-89
24	Immune cells	NK	NK	DTYMK	0.61	70	1.26e-88
24	Immune cells	NK	NK	LMNB1	0.78	66.4	4.18e-88
24	Immune cells	NK	NK	LMNB2	0.28	44.5	5.11e-88
24	Immune cells	NK	NK	SKA2	0.58	69.1	1.42e-87
24	Immune cells	NK	NK	NSD2	0.48	57.3	2.65e-86
24	Immune cells	NK	NK	MYL6B	0.35	52.7	1.79e-85
24	Immune cells	NK	NK	FABP5	0.84	65.5	2.45e-83
24	Immune cells	NK	NK	BCL2L12	0.42	57.3	1.01e-82
24	Immune cells	NK	NK	TEDC1	0.26	42.7	5.06e-82
24	Immune cells	NK	NK	RPA3	0.94	86.4	7.9e-80
24	Immune cells	NK	NK	UBE2S	1.05	74.5	1.4e-79
24	Immune cells	NK	NK	POLA2	0.26	37.3	2.6e-79
24	Immune cells	NK	NK	CD59	0.52	55.5	1.31e-77
24	Immune cells	NK	NK	MTHFD1	0.4	53.6	1.38e-77
24	Immune cells	NK	NK	TEX30	0.29	40	2.02e-75
24	Immune cells	NK	NK	RFC2	0.54	58.2	2.31e-74
24	Immune cells	NK	NK	VRK1	0.53	69.1	6.27e-74
24	Immune cells	NK	NK	BLM	0.29	36.4	8.09e-74
24	Immune cells	NK	NK	BTG3	0.33	44.5	1.59e-71
24	Immune cells	NK	NK	NRM	0.28	42.7	1.09e-70
24	Immune cells	NK	NK	CEP152	0.3	41.8	1.1e-70
24	Immune cells	NK	NK	DDX39A	0.83	86.4	4.87e-70
24	Immune cells	NK	NK	NUDT1	0.8	83.6	1.58e-69
24	Immune cells	NK	NK	ACAT2	0.46	64.5	1.57e-68
24	Immune cells	NK	NK	AC084033.3	0.4	48.2	2.17e-66
24	Immune cells	NK	NK	TUBA1C	0.65	58.2	3.92e-65
24	Immune cells	NK	NK	FADS2	0.36	35.5	7.9e-65
24	Immune cells	NK	NK	CENPK	0.46	67.3	4.85e-64
24	Immune cells	NK	NK	SNRNP25	0.53	65.5	2.6e-61
24	Immune cells	NK	NK	H2AFV	1.22	97.3	7.07e-61
24	Immune cells	NK	NK	NCAPH2	0.28	43.6	1.71e-60
24	Immune cells	NK	NK	CDCA4	0.26	40.9	1.74e-60
24	Immune cells	NK	NK	SEPT11	0.43	58.2	6.12e-60
24	Immune cells	NK	NK	HIRIP3	0.43	58.2	1.81e-58
24	Immune cells	NK	NK	KIF20B	0.53	58.2	4.32e-58
24	Immune cells	NK	NK	MMS22L	0.4	49.1	8.73e-58
24	Immune cells	NK	NK	C19orf48	0.32	50	9.51e-56
24	Immune cells	NK	NK	CKAP2	0.35	50.9	2.15e-55
24	Immune cells	NK	NK	TTF2	0.42	54.5	3.89e-55
24	Immune cells	NK	NK	SAC3D1	0.31	47.3	4.6e-55
24	Immune cells	NK	NK	TOPBP1	0.44	61.8	9.6e-55
24	Immune cells	NK	NK	RAD51C	0.29	55.5	1.21e-54
24	Immune cells	NK	NK	MCUR1	0.31	58.2	3.99e-54
24	Immune cells	NK	NK	GGCT	0.44	65.5	7.92e-54
24	Immune cells	NK	NK	SLBP	0.83	78.2	8.97e-54
24	Immune cells	NK	NK	HAUS1	0.42	60	3.3e-53
24	Immune cells	NK	NK	NABP2	0.32	43.6	5.41e-53
24	Immune cells	NK	NK	DCPS	0.38	60	7.01e-53
24	Immune cells	NK	NK	BAK1	0.32	51.8	2.49e-52
24	Immune cells	NK	NK	LMNA	0.37	26.4	4.74e-52
24	Immune cells	NK	NK	CBX5	0.7	83.6	7.49e-52
24	Immune cells	NK	NK	TSPAN5	0.27	38.2	1.79e-51
24	Immune cells	NK	NK	MPST	0.4	54.5	3.85e-51
24	Immune cells	NK	NK	POLD3	0.35	52.7	5.4e-51
24	Immune cells	NK	NK	MTHFD2	0.38	55.5	1.54e-50
24	Immune cells	NK	NK	HMGB1	1.13	97.3	2.51e-50
24	Immune cells	NK	NK	SAE1	0.5	68.2	3.09e-50
24	Immune cells	NK	NK	MSH2	0.34	51.8	4.56e-50
24	Immune cells	NK	NK	AHCY	0.27	52.7	5.22e-50
24	Immune cells	NK	NK	LRRC8A	0.27	43.6	6.81e-50
24	Immune cells	NK	NK	PDZD11	0.25	46.4	4.13e-49
24	Immune cells	NK	NK	OXCT1	0.37	52.7	9.81e-49
24	Immune cells	NK	NK	KIF22	0.55	64.5	1.27e-47
24	Immune cells	NK	NK	ANP32E	0.95	86.4	4.46e-47
24	Immune cells	NK	NK	PRIM1	0.28	47.3	1.16e-46
24	Immune cells	NK	NK	COMTD1	0.28	50	3.77e-46
24	Immune cells	NK	NK	RANBP1	0.86	87.3	5.07e-46
24	Immune cells	NK	NK	NASP	1	84.5	6.09e-46
24	Immune cells	NK	NK	ACYP1	0.26	50.9	1.01e-45
24	Immune cells	NK	NK	TFDP1	0.52	62.7	1.66e-45
24	Immune cells	NK	NK	PMVK	0.48	67.3	1.79e-45
24	Immune cells	NK	NK	TAF1B	0.32	50.9	2.48e-45
24	Immune cells	NK	NK	DCTPP1	0.57	66.4	3.43e-45
24	Immune cells	NK	NK	PTMS	0.44	37.3	4.15e-45
24	Immune cells	NK	NK	SEPHS1	0.28	49.1	5.08e-45
24	Immune cells	NK	NK	ALYREF	0.58	70.9	8.81e-45
24	Immune cells	NK	NK	TARS	0.3	61.8	1.69e-44
24	Immune cells	NK	NK	HIST1H2AG	0.26	40.9	1.71e-44
24	Immune cells	NK	NK	NUCKS1	0.92	99.1	3.1e-44
24	Immune cells	NK	NK	DNMT1	0.83	82.7	3.82e-44
24	Immune cells	NK	NK	CENPX	0.56	76.4	1.11e-43
24	Immune cells	NK	NK	PPIF	0.27	52.7	1.26e-43
24	Immune cells	NK	NK	SHMT2	0.42	59.1	1.28e-43
24	Immune cells	NK	NK	PRIM2	0.25	42.7	4.36e-42
24	Immune cells	NK	NK	TPGS2	0.42	67.3	4.59e-42
24	Immune cells	NK	NK	CPSF3	0.27	52.7	7.76e-42
24	Immune cells	NK	NK	RPL26L1	0.37	65.5	7.77e-42
24	Immune cells	NK	NK	CFAP20	0.26	49.1	8.38e-42
24	Immune cells	NK	NK	KEAP1	0.27	42.7	1.72e-41
24	Immune cells	NK	NK	CKAP5	0.28	45.5	2.22e-41
24	Immune cells	NK	NK	SUPT16H	0.71	85.5	1.3e-40
24	Immune cells	NK	NK	PSMD14	0.48	64.5	6.04e-40
24	Immune cells	NK	NK	PCNT	0.27	46.4	2.71e-39
24	Immune cells	NK	NK	YWHAH	0.62	77.3	3.68e-39
24	Immune cells	NK	NK	SMC3	0.81	81.8	5.68e-39
24	Immune cells	NK	NK	ATP1B3	0.53	72.7	5.87e-39
24	Immune cells	NK	NK	RUVBL1	0.35	63.6	1.36e-38
24	Immune cells	NK	NK	HAT1	0.46	66.4	1.4e-38
24	Immune cells	NK	NK	DBF4	0.31	48.2	1.87e-38
24	Immune cells	NK	NK	MRPL13	0.42	65.5	1.88e-38
24	Immune cells	NK	NK	CASP3	0.3	51.8	2.54e-38
24	Immune cells	NK	NK	CCDC18	0.29	43.6	3.69e-38
24	Immune cells	NK	NK	DLEU2	0.27	48.2	4.11e-38
24	Immune cells	NK	NK	CDC25B	0.56	70	4.41e-38
24	Immune cells	NK	NK	JPT1	0.94	79.1	6.4e-38
24	Immune cells	NK	NK	GMPS	0.38	70	7.43e-38
24	Immune cells	NK	NK	USP1	0.58	71.8	9.89e-38
24	Immune cells	NK	NK	NME1	0.53	67.3	1.27e-37
24	Immune cells	NK	NK	SMC1A	0.64	76.4	1.37e-37
24	Immune cells	NK	NK	NUP37	0.27	47.3	3.93e-37
24	Immune cells	NK	NK	NUDT21	0.43	67.3	4.84e-37
24	Immune cells	NK	NK	ACTL6A	0.3	53.6	8.34e-37
24	Immune cells	NK	NK	HPRT1	0.38	60.9	8.94e-37
24	Immune cells	NK	NK	EBNA1BP2	0.35	60	5.42e-36
24	Immune cells	NK	NK	CDK4	0.41	62.7	6.87e-36
24	Immune cells	NK	NK	SRPK1	0.31	66.4	8.31e-36
24	Immune cells	NK	NK	ZDHHC12	0.41	63.6	8.83e-36
24	Immune cells	NK	NK	SMS	0.42	67.3	8.83e-36
24	Immune cells	NK	NK	MSH6	0.42	49.1	1.08e-35
24	Immune cells	NK	NK	HINT2	0.43	70.9	1.1e-35
24	Immune cells	NK	NK	SNRPG	0.77	87.3	1.11e-35
24	Immune cells	NK	NK	PPIH	0.34	65.5	1.25e-35
24	Immune cells	NK	NK	NTAN1	0.3	58.2	2.85e-35
24	Immune cells	NK	NK	HNRNPD	0.71	96.4	2.91e-35
24	Immune cells	NK	NK	SSRP1	0.55	68.2	4.1e-35
24	Immune cells	NK	NK	RPA1	0.39	60.9	4.89e-35
24	Immune cells	NK	NK	COX5A	0.78	88.2	4.94e-35
24	Immune cells	NK	NK	CISD2	0.29	56.4	4.99e-35
24	Immune cells	NK	NK	BOLA3	0.35	60.9	5.11e-35
24	Immune cells	NK	NK	ISY1	0.28	63.6	7.15e-35
24	Immune cells	NK	NK	FH	0.25	50.9	7.3e-35
24	Immune cells	NK	NK	HLTF	0.27	47.3	8.52e-35
24	Immune cells	NK	NK	YEATS4	0.32	59.1	2.49e-34
24	Immune cells	NK	NK	TIMM17A	0.26	61.8	3.2e-34
24	Immune cells	NK	NK	MGME1	0.25	47.3	1.23e-33
24	Immune cells	NK	NK	CALM3	0.85	92.7	1.34e-33
24	Immune cells	NK	NK	SH3GLB2	0.26	53.6	2.75e-33
24	Immune cells	NK	NK	MFAP1	0.33	60	3.2e-33
24	Immune cells	NK	NK	RABL6	0.47	75.5	3.71e-33
24	Immune cells	NK	NK	UQCC2	0.47	64.5	4.92e-33
24	Immune cells	NK	NK	EIF4A3	0.44	71.8	5.59e-33
24	Immune cells	NK	NK	CBX3	0.65	93.6	8.37e-33
24	Immune cells	NK	NK	RECQL	0.42	73.6	8.4e-33
24	Immune cells	NK	NK	PRDX4	0.29	55.5	9.02e-33
24	Immune cells	NK	NK	TMPO	0.74	91.8	1.14e-32
24	Immune cells	NK	NK	COPS3	0.44	70	1.3e-32
24	Immune cells	NK	NK	PAICS	0.37	53.6	1.56e-32
24	Immune cells	NK	NK	GUSB	0.32	60.9	2.03e-32
24	Immune cells	NK	NK	RDX	0.25	47.3	2.59e-32
24	Immune cells	NK	NK	EXOSC3	0.29	50.9	2.94e-32
24	Immune cells	NK	NK	MRPL51	0.68	84.5	8.54e-32
24	Immune cells	NK	NK	HDGF	0.57	80	8.76e-32
24	Immune cells	NK	NK	HNRNPR	0.68	93.6	1.14e-31
24	Immune cells	NK	NK	CMC2	0.36	68.2	1.22e-31
24	Immune cells	NK	NK	XCL1	0.27	10.9	1.33e-31
24	Immune cells	NK	NK	MAZ	0.66	86.4	1.42e-31
24	Immune cells	NK	NK	PSMA4	0.75	82.7	2e-31
24	Immune cells	NK	NK	ANXA2	0.76	86.4	2.15e-31
24	Immune cells	NK	NK	TXNDC17	0.59	71.8	2.16e-31
24	Immune cells	NK	NK	MRPL28	0.39	63.6	2.23e-31
24	Immune cells	NK	NK	HNRNPAB	0.66	80	2.41e-31
24	Immune cells	NK	NK	GALM	0.26	40.9	6.1e-31
24	Immune cells	NK	NK	DPM2	0.3	57.3	6.32e-31
24	Immune cells	NK	NK	PLGRKT	0.29	56.4	1.25e-30
24	Immune cells	NK	NK	MTX1	0.26	57.3	1.29e-30
24	Immune cells	NK	NK	GLRX3	0.4	63.6	1.36e-30
24	Immune cells	NK	NK	MZT1	0.33	53.6	3.4e-30
24	Immune cells	NK	NK	MTCH2	0.31	61.8	4.56e-30
24	Immune cells	NK	NK	MRPL12	0.32	60	4.77e-30
24	Immune cells	NK	NK	LRRC59	0.28	50.9	5e-30
24	Immune cells	NK	NK	HSD17B10	0.45	75.5	9.29e-30
24	Immune cells	NK	NK	EEF1E1	0.31	60.9	1.27e-29
24	Immune cells	NK	NK	HIST2H2AC	0.38	52.7	1.65e-29
24	Immune cells	NK	NK	PRKDC	0.72	81.8	5.16e-29
24	Immune cells	NK	NK	DDB2	0.26	46.4	5.33e-29
24	Immune cells	NK	NK	ENO1	0.74	94.5	5.59e-29
24	Immune cells	NK	NK	SMARCB1	0.37	70.9	6.62e-29
24	Immune cells	NK	NK	VDAC1	0.55	77.3	7.34e-29
24	Immune cells	NK	NK	CASP2	0.27	57.3	1.56e-28
24	Immune cells	NK	NK	SEM1	0.59	88.2	1.96e-28
24	Immune cells	NK	NK	HMGXB4	0.27	58.2	2.22e-28
24	Immune cells	NK	NK	CBFB	0.27	57.3	2.98e-28
24	Immune cells	NK	NK	PTBP1	0.43	81.8	3.21e-28
24	Immune cells	NK	NK	PSMA3	0.52	79.1	3.66e-28
24	Immune cells	NK	NK	ASNA1	0.29	65.5	4.91e-28
24	Immune cells	NK	NK	FAM192A	0.32	65.5	5.27e-28
24	Immune cells	NK	NK	DAZAP1	0.38	77.3	1.03e-27
24	Immune cells	NK	NK	ITGB1	0.76	80.9	1.32e-27
24	Immune cells	NK	NK	FIBP	0.43	74.5	1.86e-27
24	Immune cells	NK	NK	MRPL22	0.34	62.7	1.93e-27
24	Immune cells	NK	NK	MRPL11	0.46	75.5	2.04e-27
24	Immune cells	NK	NK	CLTA	0.55	90.9	2.47e-27
24	Immune cells	NK	NK	TRIB2	0.26	43.6	2.82e-27
24	Immune cells	NK	NK	TMEM223	0.27	58.2	2.84e-27
24	Immune cells	NK	NK	PSMC2	0.28	62.7	3.35e-27
24	Immune cells	NK	NK	CCDC124	0.27	68.2	3.52e-27
24	Immune cells	NK	NK	YWHAE	0.56	83.6	3.89e-27
24	Immune cells	NK	NK	SRA1	0.31	63.6	3.99e-27
24	Immune cells	NK	NK	TSEN15	0.32	48.2	4.24e-27
24	Immune cells	NK	NK	PSMD1	0.32	70.9	4.75e-27
24	Immune cells	NK	NK	MRPL27	0.31	62.7	6.03e-27
24	Immune cells	NK	NK	CACYBP	0.62	78.2	7.38e-27
24	Immune cells	NK	NK	GANAB	0.37	62.7	1e-26
24	Immune cells	NK	NK	MRPL47	0.3	65.5	1.09e-26
24	Immune cells	NK	NK	FAM129A	0.41	53.6	1.23e-26
24	Immune cells	NK	NK	GTF3C6	0.46	77.3	1.39e-26
24	Immune cells	NK	NK	MPC2	0.43	73.6	1.89e-26
24	Immune cells	NK	NK	FKBP3	0.39	69.1	2.28e-26
24	Immune cells	NK	NK	CLDND1	0.42	67.3	2.67e-26
24	Immune cells	NK	NK	RANGRF	0.3	55.5	2.68e-26
24	Immune cells	NK	NK	SF3B4	0.27	61.8	3.62e-26
24	Immune cells	NK	NK	CDK5RAP2	0.28	49.1	6.11e-26
24	Immune cells	NK	NK	EIF3A	0.61	93.6	6.68e-26
[truncated: 276 more rows]

## Sheet: Table S3
Gene	HR	z	pvalue
GNLY	0.28092	-2.3251	0.0200664
NKG7	0.708637	-1.39508	0.162992
GZMB	0.917232	-0.256058	0.797906
GZMA	1.90104	1.41371	0.157447
PRF1	1.97885	0.936004	0.349271
FGFBP2	0.653559	-1.3715	0.170219
CST7	0.437623	-1.52201	0.128007
KLRD1	0.373296	-1.8532	0.0638533
CLIC3	0.820538	-0.740354	0.459085
CCL5	1.07227	0.165369	0.868653
CCL4	0.98877	-0.0333902	0.973363
KLRF1	0.772869	-1.32189	0.186205
CTSW	0.558951	-2.63445	0.00842738
HOPX	0.76466	-0.461866	0.644178
GZMH	1.19602	0.498629	0.618041
KLRB1	0.943987	-0.143663	0.885767
IL2RB	1.21689	0.343394	0.731302
CD247	0.649784	-0.99269	0.320861
GZMM	0.917668	-0.286196	0.774728
EFHD2	0.736954	-0.485643	0.627221
CX3CR1	1.06166	0.140288	0.888433
MATK	0.849123	-0.404889	0.685559
IFITM2	0.558568	-0.797438	0.425197
PTGDR	0.410529	-1.77066	0.0766171
ABHD17A	0.472791	-0.812853	0.416302
FCER1G	0.181093	-2.80709	0.00499912
PYHIN1	2.17252	1.6882	0.091373
HCST	1.8416	1.02587	0.304953
PLEK	0.543895	-1.16106	0.245616
CD63	0.0497948	-2.08629	0.0369527
APOBEC3G	0.818964	-0.230799	0.817471
CD160	1.46606	0.854531	0.392811
CD7	0.589123	-1.06864	0.285231
RHOC	0.843426	-0.295493	0.767617
ID2	1.2094	0.334225	0.73821
APMAP	3.8004	0.801328	0.422942
SAMD3	0.601048	-1.44831	0.14753
CHST12	0.0674485	-1.79478	0.0726889
TBX21	0.683462	-0.847779	0.396561
KLRG1	1.16734	0.192331	0.847483
S1PR5	0.178501	-1.74809	0.0804477
RARRES3	0.729012	-0.478006	0.632646
CD99	1.02853	0.0865981	0.930991
TTC38	0.384548	-1.52882	0.126308
ARL4C	1.54525	1.17897	0.238409
PFN1	15.1056	2.28129	0.0225314
XBP1	0.105121	-1.9788	0.047839
CTSC	1.74688	1.06731	0.28583
ITGB2	0.693913	-0.831204	0.405859
GNPTAB	0.151655	-1.2558	0.209187
PLAC8	2.45457	1.62219	0.104763
CD300A	1.26525	0.67303	0.500928
JAK1	1.4937	0.416165	0.677289
SYNE2	0.925369	-0.0854037	0.93194
PLEKHF1	1.12683	0.368378	0.712591
RAP1B	5.93188	0.788421	0.430451
CMC1	2.64076	0.992851	0.320782
CYBA	0.144377	-2.18432	0.0289386
IFITM1	1.44937	0.542048	0.587786
CD81	1.05031	0.164896	0.869026
RUNX3	0.917305	-0.0833506	0.933573
ABI3	0.545993	-0.55548	0.578566
CEP78	47.2415	3.70766	0.000209185
MBP	0.24624	-1.41869	0.15599
PRSS23	1.13728	0.18315	0.85468
MYO1F	0.821457	-0.578351	0.563027
C12orf75	2.47377	2.51331	0.0119605
ZAP70	0.711905	-0.868853	0.384927
UBB	17.0759	0.949514	0.342359
DOK2	0.398918	-1.45303	0.146214
NCR3	1.31941	0.445546	0.655925
MYL12A	3.3719	1.3653	0.17216
TPST2	4.76583	2.53595	0.0112144
SYNE1	1.22185	0.287113	0.774026
C1orf21	1.34091	0.553991	0.579585
CFL1	10.8968	1.86115	0.0627236
GK5	5.36875	2.43218	0.0150084
GNG2	0.659424	-0.819071	0.412746
SLC9A3R1	15.9649	2.16838	0.0301297
METRNL	0.459648	-3.19448	0.00140081
RNF213	1.06495	0.0946847	0.924565
ITGAL	0.693085	-0.577889	0.563339
LY6E	1.91345	2.61528	0.00891537
SPN	0.798463	-0.659167	0.509789
PTPN4	1.07844	0.102974	0.917984
CLEC2B	1.59942	1.30008	0.193573
STOM	0.189503	-2.44461	0.0145008
CALM1	0.818244	-0.436132	0.662741
ACTN4	1.96451	0.745755	0.455815
OSTF1	2.14724	0.730525	0.465069
BIN2	1.0076	0.0139544	0.988866
SLAMF7	0.691558	-0.378618	0.704971
GPR65	0.988152	-0.0402582	0.967887
FKBP11	0.0236796	-2.28811	0.0221312
SH2D2A	3.99799	2.15444	0.0312058
FAM49B	11.0366	2.97157	0.00296282
ADRB2	0.962307	-0.0500056	0.960118
LITAF	0.477513	-0.976191	0.32897
ARPC2	96.9187	2.27273	0.0230422
PRDX5	2.12319	0.552331	0.580721
IRF1	0.24881	-1.47276	0.140817
PSMB9	0.2278	-1.1051	0.269118
FLNA	3.28571	2.36092	0.0182294
TGFB1	1.91785	0.942373	0.346002
RAC2	27.6508	2.82941	0.00466339
SEPT7	3.09443	1.07327	0.283149
GBP5	0.758674	-0.852584	0.39389
PPP1R18	2.25863	0.758886	0.447921
SKAP1	0.74816	-0.505422	0.613262
CCND3	0.384177	-1.26287	0.206636
IFITM3	0.7397	-1.00713	0.313874
RASSF1	0.421195	-2.57155	0.0101244
PPIB	26.0876	1.45023	0.146994
SYTL1	0.218491	-2.01548	0.0438545
STAT4	0.415785	-1.17617	0.239527
PRKCH	1.39982	0.415234	0.677971
SYTL3	1.05544	0.0916796	0.926953
PSME1	0.32434	-0.889572	0.373696
IL2RG	0.472746	-0.970805	0.331645
LPCAT1	0.995514	-0.0100729	0.991963
MSN	0.195241	-1.79789	0.0721945
CD38	0.473042	-0.736829	0.461226
TGFBR3	0.910552	-0.152407	0.878866
HLA-A	0.0359075	-1.12917	0.258824
MYL6	0.043451	-2.23811	0.025214
F2R	1.00493	0.0153898	0.987721
ASCL2	1.16851	0.391913	0.695123
PPP1CA	1.23995	0.230318	0.817845
TIGIT	0.955034	-0.171154	0.864102
ZEB2	0.485855	-1.21693	0.223633
PRMT2	1.75602	0.652274	0.514224
STARD3NL	7.44279	1.35079	0.176763
EVL	0.694753	-0.686613	0.492327
HLA-E	0.00682369	-3.65889	0.000253311
LCP1	1.29585	0.788431	0.430445
ACTB	0.609519	-0.228098	0.81957
MYL12B	4.49522	1.34387	0.178989
CEBPD	0.592146	-1.37907	0.167875
EOMES	0.861876	-0.235454	0.813857
HLA-B	0.0292459	-1.70875	0.0874982
CD244	0.297695	-2.02373	0.0429975
TMSB4X	0.67462	-1.04467	0.296177
RPS15A	1.05138	0.0331308	0.97357
RPS29	0.229222	-1.22573	0.220301
RPL29	2.02723	0.384629	0.700513
EEF2	0.0469614	-1.43299	0.15186
RPS27	1.05514	0.0417208	0.966721
NAP1L1	4.41918	0.932981	0.35083
RPL18	1.37478	0.267141	0.789361
RPS9	0.0866699	-2.17414	0.0296944
RPLP1	0.500093	-0.576382	0.564357
RPL8	1.3307	0.120647	0.903971
RPS5	1.07407	0.0314236	0.974932
RPLP0	2.68975e+07	2.40376	0.0162275
CD52	0.741711	-1.11163	0.266298
RPS8	0.671186	-1.4372	0.150662
VIM	2.29175	1.14071	0.25399
CD3G	1.37449	0.698691	0.484745
TRAC	0.516871	-1.07889	0.280639
CD3D	0.452666	-1.60351	0.108823
CD3E	2.50402	2.26756	0.0233558
COTL1	0.66829	-1.02193	0.306813
AIF1	0.399262	-1.63838	0.101342
LTB	0.392568	-1.07251	0.283491
RORA	0.383104	-1.71601	0.0861597
CORO1A	3.95802	2.16554	0.0303465
NCF1	0.297532	-2.97384	0.00294102
PIP4K2A	1.98103	1.04045	0.298132
PTGER2	0.642901	-1.76393	0.0777431
DENND2D	0.0604974	-2.85434	0.00431266
BSG	2.00068	0.77036	0.441086
UBC	5.03e-05	-2.27141	0.0231222
MVD	0.910025	-0.310725	0.75601
DNAJC1	0.00216633	-4.16158	3.16e-05
SH3BGRL3	20.8845	2.43868	0.014741
RNF125	3.67674	2.90468	0.00367633
TSEN54	2.7107	1.30841	0.190733
HLA-F	0.24065	-1.90623	0.05662
RNASET2	1.66749	0.44641	0.655301
MAPK1	11.2886	1.82552	0.0679219
CISD3	2.50034	0.57867	0.562812
STK10	1.5492	0.450332	0.652471
PPP2R5C	1.65417	0.391899	0.695133
RPS4Y1	0.724621	-1.61613	0.106066
PTPN22	0.820587	-0.69186	0.489025
AKNA	0.725499	-0.593833	0.552624
LSP1	0.678287	-1.21849	0.223039
CHCHD10	0.961858	-0.050919	0.95939
LYAR	3.54643	1.1362	0.255875
PLP2	3.54156	1.202	0.229364
HLA-DRA	0.506029	-2.6941	0.00705792
UBE2F	0.597949	-0.475473	0.63445
CXCR4	0.121253	-3.25936	0.00111662
MIB2	0.139442	-2.00393	0.0450777
BTG1	0.463347	-0.918288	0.358468
SPINT2	0.745139	-1.05957	0.289338
SUN2	2.89821	1.22812	0.219403
FYN	0.898679	-0.25202	0.801026
AOAH	0.523089	-1.48709	0.13699
APOBEC3C	6.56207	2.36264	0.0181455
GSTP1	0.632202	-0.705511	0.480492
PRR5	0.837296	-0.529121	0.596721
FCGRT	0.392688	-1.83331	0.066756
ANXA6	0.109561	-2.72817	0.00636862
FGR	0.74216	-1.10818	0.267785
ARHGEF3	4.37919	1.82674	0.0677385
TBC1D10C	0.269856	-2.11126	0.0347499
CDC42	3.70562	0.931883	0.351397
MYC	1.59413	1.19308	0.232839
PTPRC	0.867157	-0.421191	0.673616
SLC25A6	0.081515	-2.11649	0.034303
ANP32B	3.93284	0.851139	0.394692
BST2	0.343351	-1.21627	0.22388
FMNL1	1.35388	0.422939	0.67234
CYBB	0.383264	-1.5194	0.128661
CDKN2D	0.988058	-0.0250611	0.980006
TCF25	0.00727183	-3.49823	0.000468352
PTPN7	15.0852	1.87915	0.0602245
PSMB8	1.85219	0.859417	0.39011
ARPC4	1.29455	0.617349	0.537005
RASAL3	6.31855	2.32034	0.0203223
AQP3	0.7049	-0.476142	0.633973
SH2D1A	0.303301	-1.77927	0.0751952
SDF2L1	0.512503	-0.639058	0.522785
BTN3A2	0.371648	-1.66459	0.095994
ADAM8	1.36594	0.822421	0.410837
ANXA5	2.41272	0.554799	0.579032
YWHAZ	221.757	3.24347	0.00118083
ERP29	0.0188918	-2.53994	0.011087
CTSH	1.51474	1.29315	0.195958
EBP	5.68972	1.68844	0.0913276
HSP90AA1	31.5111	2.14437	0.0320029
WIPI1	0.130504	-1.76022	0.0783704
ANXA1	1.61173	1.53156	0.125631
MACF1	0.489717	-0.595516	0.551499
MLLT6	0.579758	-0.330682	0.740885
BATF	3.22671	2.44901	0.014325
IFNGR2	1.60385	0.342522	0.731958
YBX3	2.14958	2.13573	0.032701
BIRC3	0.431639	-2.53369	0.0112868
TKT	1.79587	0.691789	0.48907
FTL	1.25076	0.0887986	0.929242
SIGIRR	0.562855	-1.11376	0.265383
RAB37	1.05627	0.130337	0.8963
HENMT1	1.21462	0.228488	0.819267
SPI1	0.630258	-1.10183	0.270537
MYO1G	0.886295	-0.24137	0.809268
PXN	0.669026	-0.72255	0.469956
RAB29	1.10458	0.177378	0.859211
INPP5D	0.323442	-1.59482	0.110753
GCA	4.45661	1.51968	0.128591
PRELID1	0.0827671	-2.11043	0.0348211
LGALS1	6.44568	2.80709	0.00499916
OPTN	0.379602	-1.27079	0.203803
CCDC12	0.906369	-0.0844462	0.932702
SIPA1	0.661287	-1.2057	0.227933
RHOF	0.833471	-0.229439	0.818528
FTH1	0.178527	-1.46981	0.141613
HMOX2	16.6471	2.58326	0.00978725
MPEG1	0.319884	-2.59026	0.00959036
SPCS2	0.00408156	-2.59381	0.00949202
CD55	8.57082	2.33839	0.0193671
P4HB	2.22805	0.607309	0.543646
CFP	0.492234	-1.93429	0.0530779
DGKZ	2.73365	1.88043	0.0600494
PSMB10	0.509327	-0.891127	0.372861
GTF3C1	8.24403	2.28593	0.0222585
POU2F2	0.184649	-1.92413	0.0543383
MEF2C	0.144628	-1.57185	0.115984
TRAPPC1	2.47556	0.761017	0.446647
FOSB	0.410226	-2.88644	0.00389628
AES	0.699443	-0.470387	0.638079
FOS	0.440506	-1.67813	0.093322
TMEM14C	3.044	0.713669	0.475432
IL12RB1	0.630155	-0.663365	0.507097
ZNF276	1.0718	0.0971502	0.922607
SERP1	0.0247705	-1.93684	0.0527652
LMAN2	0.13037	-1.86637	0.0619903
SEC61B	0.0775175	-1.51867	0.128845
SSR4	0.18968	-0.532573	0.594329
ADA	1.89295	1.34316	0.179219
ARHGAP9	0.595495	-0.696972	0.48582
COPE	0.898712	-0.179217	0.857767
LY86	0.184708	-2.79163	0.00524435
ATM	0.0502501	-2.52158	0.011683
MNDA	0.64714	-1.07267	0.283421
CBLB	1.64462	0.772236	0.439975
TMED9	0.00234249	-3.40184	0.000669334
FCN1	0.506377	-1.9945	0.0460972
NCF2	0.948966	-0.222744	0.823735
IKZF3	2.13903	0.930676	0.352021
GPR183	0.608503	-0.860594	0.389461
SASH3	0.293874	-1.53773	0.124115
DDX5	0.344644	-1.38557	0.165878
PPT1	0.763713	-0.135331	0.89235
LST1	0.282267	-2.98208	0.00286299
CAPG	0.866343	-0.451215	0.651834
VCAN	0.144561	-3.41479	0.000638317
SUB1	15.5417	1.23329	0.217469
RAB27A	0.307169	-1.08809	0.276557
CFD	0.549619	-2.17192	0.0298614
SERPINA1	0.281407	-1.73284	0.0831247
GBP2	1.00251	0.00549318	0.995617
MT2A	0.199584	-2.24566	0.0247258
RRBP1	1.35728	0.391507	0.695422
SCP2	1.74344	0.368194	0.712729
GRN	0.218372	-1.75479	0.0792948
APOL6	0.611665	-0.491164	0.62331
H1FX	0.542206	-0.58876	0.556022
CD36	0.193134	-2.93157	0.00337257
MS4A6A	0.191618	-2.4608	0.0138626
LMO4	0.0895879	-2.79637	0.005168
CSF3R	0.464619	-1.21045	0.226108
PPA1	28.7689	2.30549	0.0211392
CTSB	0.0904453	-2.69772	0.00698158
TBCB	22.1575	2.81542	0.00487133
CSTA	0.574482	-0.935402	0.349581
HSP90B1	1.0376	0.0355989	0.971602
MANF	0.988877	-0.00950811	0.992414
POLR2G	28.3641	1.98253	0.0474203
CDC42SE1	33.6266	2.59974	0.00932955
LYL1	0.258756	-3.38365	0.000715287
PCSK7	1.09468	0.139519	0.88904
DSTN	0.295504	-0.824033	0.409921
CD14	0.624445	-1.98813	0.0467976
S100A12	0.808729	-0.922797	0.356113
ARHGEF1	1.74662	1.50374	0.132647
STK4	3.24172	1.0271	0.304371
HCK	0.564838	-0.984838	0.324703
TSPAN32	0.461761	-1.41057	0.158372
TIMP2	0.735057	-0.949661	0.342285
HLA-DMA	0.305206	-2.46446	0.0137219
HLA-DMB	0.0452813	-3.22503	0.00125959
EVI2B	0.0817975	-2.12749	0.0333797
LYZ	0.494936	-2.25116	0.0243751
MARCKS	0.763959	-0.67419	0.500191
S100A9	0.688604	-1.75026	0.0800731
BZW1	16.4819	1.48704	0.137005
STK17A	0.762996	-0.462795	0.643511
ARHGAP30	15.7228	2.99405	0.00275303
C4orf48	0.426252	-1.37698	0.168518
PHPT1	2.07742	0.675102	0.499611
BRI3	0.146041	-1.39522	0.162951
CLEC7A	2.30024	2.24552	0.0247346
SYPL1	1.27508	0.554936	0.578939
SSBP4	1.22488	0.360346	0.718589
TPM3	13.3806	2.18379	0.0289776
BCL11A	0.608478	-1.14764	0.251117
DNPH1	1.96028	0.845388	0.397894
APP	1.30449	0.855358	0.392353
S100A8	0.585671	-1.87784	0.0604027
AP1S2	3.76381	1.69971	0.0891854
DUSP1	0.0964072	-2.50967	0.0120845
TNFSF13B	0.789027	-0.463959	0.642677
PDIA6	5.01797	0.919044	0.358073
ALKBH7	0.204029	-1.85314	0.0638618
LCK	0.641326	-0.909555	0.363057
RAB31	0.593531	-1.74144	0.0816062
SIRT2	0.247497	-2.10072	0.0356654
ARHGDIB	5.25735	1.6551	0.0979041
MAP3K8	0.654479	-1.17709	0.239161
LGALS3	1.29576	0.378559	0.705015
TPM4	0.221856	-1.61166	0.107035
CREM	0.902977	-0.141339	0.887602
C19orf66	0.078253	-1.82666	0.067751
GNAS	0.465717	-0.405895	0.68482
BASP1	0.292858	-2.56784	0.0102335
HSPA5	0.00739976	-3.11381	0.00184688
BHLHE40	0.754205	-1.09735	0.272488
CPVL	0.540186	-2.12971	0.0331958
RNASE6	1.17632	0.957256	0.338438
TRG-AS1	2.40916	2.15936	0.0308225
RNF166	0.424512	-1.19171	0.233375
LGALS2	0.444144	-2.59406	0.00948496
SRPK2	34.9782	2.87708	0.00401378
PATL2	1.10296	0.292324	0.770039
SLC7A7	0.0219894	-5.18259	2.19e-07
ALDH2	0.170594	-3.61504	0.000300305
CD79A	0.332139	-2.69785	0.00697891
ALOX5	0.390736	-1.57743	0.114696
ARF6	6.07581	1.55627	0.119644
ACTR3	7.39926	1.1333	0.257089
CD8B	0.495888	-1.4524	0.146389
CCDC88A	4.55872	2.61405	0.0089476
IGSF6	0.566505	-1.73027	0.0835823
BTK	1.2084	0.166056	0.868113
IDI1	1.5804	0.401585	0.687989
CKAP4	0.0483639	-2.6138	0.00895417
WDR1	0.326796	-0.948767	0.342739
PSTPIP1	1.3469	0.516793	0.605301
PEBP1	0.580163	-0.370741	0.71083
PRPF38B	1.81577	0.565156	0.571968
NCF4	0.455546	-1.39384	0.163365
FXYD5	1.18569	0.156431	0.875694
TYMP	1.03782	0.0573426	0.954272
NFATC3	1.02247	0.0198248	0.984183
LINC00623	2.31667	0.998579	0.317999
PGD	2.38992	0.981788	0.326204
RGS2	1.13462	0.264382	0.791486
CELF2	0.546662	-0.602907	0.54657
CTSZ	1.70919	0.857882	0.390958
SLFN5	1.86756	1.1891	0.234398
BCL11B	0.417065	-1.51694	0.129283
IER2	0.436857	-1.53831	0.123972
SULT1A1	0.392812	-0.898468	0.368936
WIPF1	15.9185	2.12061	0.0339547
PPP1R12A	19.7129	2.77195	0.00557223
PITPNC1	2.19355	1.2017	0.229478
KLF4	0.89461	-0.365753	0.71455
VAMP2	0.0326054	-3.54108	0.000398488
YWHAQ	3611.07	3.13335	0.00172821
LILRA5	1.02513	0.026766	0.978646
ATOX1	1.28291	0.522419	0.601378
CSK	7.61013	1.67399	0.0941322
TMEM59	0.693105	-0.572458	0.567012
RBM47	0.312135	-1.57638	0.114938
KDELR2	0.00356925	-3.3306	0.000866586
CAPZB	4.82813	0.895931	0.370289
SEC11C	1.67405	0.325752	0.744612
PDK1	0.926911	-0.0809365	0.935492
GPX4	0.0943168	-2.06187	0.0392205
PTPRA	2.00249	0.936882	0.348819
ACAP1	1.62588	0.952286	0.340952
MS4A7	0.351038	-2.55744	0.0105445
C5AR1	0.69296	-1.61735	0.105802
RPA2	0.0289125	-2.17794	0.0294105
SCPEP1	0.842402	-0.219685	0.826116
ITM2C	0.189082	-2.31409	0.020663
COMMD7	0.997224	-0.00403317	0.996782
RNF130	0.495888	-0.952199	0.340996
ICAM3	0.185787	-2.82503	0.00472767
LEPROTL1	0.0644867	-1.81097	0.0701459
UCP2	1.08089	0.0747164	0.94044
BAX	1.6799	1.10651	0.268504
TMED10	0.278633	-1.11161	0.266306
JTB	1692.87	2.94057	0.00327605
GIMAP4	0.716233	-0.955933	0.339106
RNF167	0.457186	-1.48683	0.137059
PRR13	6.99368	1.18649	0.235429
PARP8	0.606812	-0.50062	0.616638
NAMPT	1.94923	1.29492	0.195346
TAOK3	0.0731064	-2.63995	0.00829182
FUS	3.83543	1.07115	0.284102
PDLIM2	0.40719	-1.75219	0.0797414
RABAC1	0.351008	-0.85874	0.390484
DAD1	1.17525	0.109492	0.912812
CYTH1	0.862685	-0.244841	0.80658
NPC2	0.437203	-0.788493	0.430409
FKBP2	0.0282367	-3.75951	0.000170247
MCL1	5.05159	1.50714	0.131774
CD74	0.0568957	-4.30303	1.68e-05
NDUFS6	21.6897	2.59174	0.00954915
EHD1	0.510071	-1.51407	0.130009
SEC61G	18.389	1.32088	0.186542
FAM107B	0.777841	-0.648853	0.516433
RALGPS2	5.05458	2.04727	0.0406312
GLRX	0.0425124	-3.23398	0.00122077
SLA	1.08703	0.183139	0.854689
RPS6KA1	0.651287	-0.746087	0.455615
COX17	0.840519	-0.53182	0.594851
DUSP2	0.83524	-0.782848	0.433716
TSC22D4	0.130703	-1.73209	0.0832571
RASSF5	158.008	4.11543	3.86e-05
DERL1	0.292269	-0.639038	0.522798
ANAPC11	1.53071	0.611403	0.540933
CST3	1.19674	0.33561	0.737165
C1orf56	12.4557	2.36257	0.0181488
SH3KBP1	0.0462376	-3.02005	0.00252736
CLEC12A	0.895012	-0.181287	0.856142
BLVRB	2.54921	1.3882	0.165076
SAMD9	11.6763	3.00503	0.00265553
SPSB3	0.695843	-0.302914	0.761956
TALDO1	21.2266	1.94859	0.0513445
TSTD1	8.57352	1.61318	0.106704
SH3BP1	2.45734	1.70126	0.0888944
TUBA1B	102.764	2.31515	0.0206049
DEK	1.07494	0.271743	0.78582
LAMP1	0.182149	-2.21253	0.0269302
NOP10	12.9464	1.49849	0.134006
DUSP6	0.877986	-0.402878	0.687038
CTSS	0.753157	-0.215502	0.829376
ARHGAP25	0.117182	-2.19718	0.0280077
TMCO1	1.31794	0.213454	0.830973
TCF4	0.605498	-1.2641	0.206196
CUTA	0.014354	-2.09472	0.0361955
CRELD2	0.400721	-0.904678	0.365636
DDOST	0.137624	-1.08884	0.276224
LRPAP1	0.121616	-2.72834	0.00636542
ORAI1	2.28938	1.35381	0.175796
C9orf78	1.13303	0.110976	0.911635
SPCS3	0.0866412	-1.48058	0.138719
TRIM22	0.435535	-1.92997	0.0536111
CNOT6L	5.04284	1.94254	0.0520719
CYFIP2	1.18991	0.385409	0.699935
PRKACB	0.464995	-0.913148	0.361165
TUBB	825.897	4.74877	2.05e-06
KRTCAP2	5.29162	1.7117	0.086952
FGL2	0.351335	-2.80472	0.00503596
APLP2	2.39943	0.892059	0.372361
TIMP1	1.5006	1.12942	0.258722
TSPO	1.45793	0.573689	0.566178
STXBP2	0.440352	-1.24534	0.213005
IL32	1.42094	0.752079	0.452003
SAT1	0.24891	-1.82944	0.0673335
COMMD6	0.182501	-1.38904	0.164822
OAZ1	0.448149	-0.239719	0.810548
H3F3A	0.779782	-0.43111	0.666388
TMSB10	5.5769	1.02748	0.304195
SLC25A5	37.9918	2.52124	0.0116942
COX7A2	4.15317	0.725784	0.467971
S100A6	1.83151	1.50465	0.132413
NDUFA4	4.70861	0.823058	0.410475
SKP1	0.015181	-1.89166	0.0585366
PRDX1	2.03058	0.633699	0.526278
SPCS1	0.0334899	-1.02924	0.303365
PPDPF	1.07744	0.124284	0.90109
GMFG	1.86617	1.02981	0.303099
H2AFZ	228.521	3.63722	0.000275602
NDUFB4	0.114485	-1.38001	0.167583
TRMT112	0.00797882	-2.13858	0.0324694
S100A11	4.19347	2.38764	0.016957
ZNF706	0.0873077	-1.71349	0.0866224
NDUFB11	0.229405	-0.965298	0.334395
PRDX2	0.885195	-0.150896	0.880058
LSM5	5.566	1.52472	0.127329
SEC62	0.0120139	-3.89038	0.000100088
HSPB1	1.60842	0.974709	0.329705
NDUFV2	8.93422	1.77259	0.0762969
TXN	2.19513	0.673537	0.500606
NDUFB5	0.432194	-0.493833	0.621424
ARL6IP5	0.980902	-0.0180843	0.985572
NDUFC1	0.281439	-1.298	0.194287
TMEM258	0.000305567	-2.61966	0.00880187
ARPC1B	4.51781	1.53163	0.125614
TUBA4A	0.231664	-1.0795	0.280365
OSTC	1.21518	0.0899343	0.928339
CRIP1	1.89267	3.39363	0.000689727
TSC22D3	0.695797	-0.403049	0.686912
ATP6V0B	6.56184	1.19409	0.232443
ATRAID	0.20171	-1.10299	0.270031
SVIP	2.02136	0.753064	0.451412
NDUFAF3	0.710827	-0.301574	0.762977
AAK1	0.936971	-0.0556891	0.955589
EMC4	0.0769341	-1.50039	0.133514
N4BP2L2	0.210713	-1.79846	0.0721049
ISG20	1.28964	0.267815	0.788842
AP2S1	3.05406	0.651192	0.514922
IMPDH2	3.47997	1.46628	0.142571
MBNL1	1.96226	0.62327	0.533107
CNPY3	2.10168	0.750866	0.452733
STMN1	2.45049	1.18292	0.236841
TAGLN2	5.67903	3.80023	0.000144562
ADI1	0.483367	-0.479161	0.631824
NENF	0.34119	-1.06164	0.288398
PECAM1	0.101891	-3.89011	0.000100198
MT1X	0.573655	-1.09863	0.271931
IKZF1	1.83519	0.674839	0.499778
PIM2	3.66678	1.59014	0.111804
HEXB	0.0550421	-2.68974	0.00715068
RTN3	0.142469	-1.22161	0.221854
ASAH1	0.0599961	-1.99981	0.0455212
ARGLU1	1.7782	0.66754	0.504427
ANKRD44	0.365582	-1.17027	0.241892
EIF4EBP1	3.89968	2.1629	0.0305487
TRBC1	0.957491	-0.0637826	0.949143
CD79B	0.149668	-2.24661	0.0246649
IFT57	0.344681	-1.29321	0.195938
SULF2	1.0364	0.139064	0.8894
RHOB	0.937331	-0.119249	0.905078
ETS1	1.61035	1.017	0.309152
GGH	9.39283	3.48649	0.000489404
CKS1B	23.4276	4.62684	3.71e-06
MT1E	0.491065	-1.15091	0.249769
CD59	0.0621176	-3.08981	0.00200285
LMNA	1.15459	0.142497	0.886688
MTHFD2	4.14755	1.35209	0.176347
PMVK	20.0548	2.86488	0.00417168
PTMS	0.451508	-1.36495	0.172267
CDC25B	12.6391	2.75699	0.00583368
NME1	29.805	2.60849	0.00909413
HINT2	0.0953451	-1.49442	0.135065
COX5A	3.65088	0.871699	0.383373
CISD2	0.16504	-1.67991	0.092974
PRDX4	1.88753	0.371692	0.710122
PAICS	103.553	3.79338	0.000148612
GUSB	5.0748	1.6896	0.0911046
MRPL51	0.582903	-0.326037	0.744396
ANXA2	4.64019	1.62439	0.104292
LRRC59	1.14376	0.116	0.907652
ITGB1	1.41163	0.525171	0.599464
YWHAE	1.07964	0.0632902	0.949535
PARP1	93.2318	2.97996	0.00288283
MLEC	0.151669	-1.07672	0.281607
EMC7	0.160097	-1.36813	0.171272
ARL6IP1	96.7087	3.38228	0.000718876
UQCRQ	1.45704	0.201915	0.839983
RHEB	2.06775	0.408933	0.682589
MRPL23	1.06863	0.0868419	0.930797
HIST1H1C	3.34081	2.24917	0.0245019
SNRPE	0.506303	-0.549704	0.582523
PRDX3	6.18024	0.900965	0.367607
ZFP36L2	0.939792	-0.0894616	0.928715
PDIA4	1.25675	0.182299	0.855348
PDCD5	12.0004	2.18358	0.0289929
LAMTOR2	5.84159	2.00477	0.0449875
BUB3	1.23431	0.176352	0.860018
HSPD1	6.28489	1.6827	0.0924325
TMEM208	1.56698	0.340325	0.733612
IFI6	0.851665	-0.441832	0.658611
NUCB2	0.0899723	-2.89126	0.00383696
HDAC1	0.0995431	-1.69939	0.0892461
MIF	3683.77	3.95818	7.55e-05
SSR3	1.78451	0.418515	0.675571
LMAN1	3.15948	1.58722	0.112462
NHP2	10.1709	2.00459	0.0450068
EIF2S2	0.752185	-0.202418	0.83959
MYH9	2.08051	0.955743	0.339202
CAP1	0.338149	-0.862675	0.388316
PPP1R14B	4.31542	2.20451	0.0274887
DERL3	0.146507	-2.31199	0.0207784
RPS27L	0.01039	-3.15784	0.00158942
S1PR4	0.875887	-0.288323	0.7731
GADD45GIP1	0.447874	-1.24394	0.213522
CANX	0.145268	-1.30307	0.192551
CDV3	1.07993	0.0806539	0.935717
UBXN4	0.193385	-0.910777	0.362413
RPN2	0.213475	-0.80264	0.422183
SRSF7	19.715	1.83819	0.0660339
NDUFA11	0.511068	-0.523126	0.600886
PTP4A2	0.0436463	-1.80686	0.0707847
TMBIM6	0.263782	-0.788898	0.430172

## Sheet: Table S4
Gene	HR	z	pvalue
GNLY	0.0566971	-2.3458	0.0189862
NKG7	0.466328	-1.40747	0.159287
GZMB	0.849347	-0.197307	0.843588
GZMA	4.66465	1.40491	0.160047
PRF1	5.97371	0.935043	0.349766
FGFBP2	0.386293	-1.39581	0.162771
CST7	0.140661	-1.55886	0.11903
KLRD1	0.0970856	-1.83904	0.0659099
CLIC3	0.672416	-0.653214	0.513618
CCL5	1.18495	0.161515	0.871687
CCL4	0.98294	-0.0195535	0.9844
KLRF1	0.594023	-1.21474	0.224464
CTSW	0.232748	-2.66633	0.00766852
HOPX	0.52677	-0.473103	0.63614
GZMH	1.47795	0.449671	0.652947
KLRB1	0.907179	-0.100188	0.920195
IL2RB	1.7573	0.375243	0.70748
CD247	0.372743	-1.00325	0.315741
GZMM	0.798106	-0.333847	0.738495
EFHD2	0.480069	-0.449255	0.653248
CX3CR1	1.11883	0.104621	0.916676
MATK	0.694024	-0.378935	0.704736
IFITM2	0.178008	-0.823249	0.410367
PTGDR	0.115384	-1.80365	0.0712867
ABHD17A	0.127889	-0.829802	0.406651
FCER1G	0.0104208	-2.8701	0.00410336
PYHIN1	5.75528	1.63882	0.101251
HCST	4.42318	0.946622	0.343831
PLEK	0.191518	-1.16697	0.243224
CD63	9.80762e-05	-2.1125	0.0346435
APOBEC3G	0.614392	-0.21315	0.83121
CD160	2.74623	0.923369	0.355815
CD7	0.287166	-1.03791	0.299313
RHOC	0.625387	-0.326971	0.743689
ID2	1.73169	0.352254	0.724648
APMAP	46.7609	0.806451	0.419983
SAMD3	0.295804	-1.45651	0.145253
CHST12	0.000474941	-1.79281	0.0730041
TBX21	0.419138	-0.785456	0.432186
KLRG1	1.63152	0.237623	0.812174
S1PR5	0.0321403	-1.75435	0.0793704
RARRES3	0.397761	-0.507394	0.611878
CD99	1.07388	0.0811702	0.935307
TTC38	0.101632	-1.51369	0.130104
ARL4C	2.91229	1.14612	0.251747
PFN1	2991.96	2.2635	0.0236047
XBP1	0.00170257	-1.96697	0.0491866
CTSC	3.72849	0.979237	0.327463
ITGB2	0.43611	-0.794316	0.427012
GNPTAB	0.00541181	-1.29438	0.195534
PLAC8	11.6552	1.55134	0.120821
CD300A	1.82972	0.7074	0.479318
JAK1	3.18193	0.438314	0.661159
SYNE2	0.792607	-0.101775	0.918935
PLEKHF1	1.37256	0.396138	0.692003
RAP1B	197.421	0.782407	0.433976
CMC1	11.9154	0.933925	0.350342
CYBA	0.00470283	-2.16952	0.0300435
IFITM1	2.89745	0.522199	0.601532
CD81	1.05251	0.065211	0.948006
RUNX3	0.771105	-0.0939256	0.925168
ABI3	0.205811	-0.549279	0.582814
CEP78	20545.7	3.6753	0.000237567
MBP	0.0324303	-1.4283	0.153207
PRSS23	1.36276	0.195667	0.844871
MYO1F	0.650598	-0.528789	0.596952
C12orf75	10.2716	2.44135	0.0146326
ZAP70	0.460782	-0.869545	0.384549
UBB	5292.2	0.928379	0.353211
DOK2	0.0894836	-1.50101	0.133353
NCR3	1.97852	0.483046	0.629063
MYL12A	24.7278	1.37572	0.168908
TPST2	67.979	2.4676	0.0136021
SYNE1	1.5179	0.259731	0.795071
C1orf21	2.00501	0.544147	0.58634
CFL1	666.835	1.86583	0.0620658
GK5	47.2528	2.36271	0.0181417
GNG2	0.395756	-0.776381	0.437524
SLC9A3R1	2668.39	2.16414	0.030454
METRNL	0.148072	-3.17964	0.00147459
RNF213	1.13276	0.0756316	0.939712
ITGAL	0.388788	-0.55111	0.581558
LY6E	4.92463	2.49981	0.0124261
SPN	0.623426	-0.614262	0.539042
PTPN4	1.28015	0.134479	0.893024
CLEC2B	3.09467	1.26802	0.204792
STOM	0.0131833	-2.44242	0.0145893
CALM1	0.604193	-0.419539	0.674822
ACTN4	6.21075	0.731607	0.464408
OSTF1	8.82395	0.762786	0.445591
BIN2	1.0586	0.0387354	0.969101
SLAMF7	0.350426	-0.368045	0.71284
GPR65	0.935812	-0.0936955	0.925351
FKBP11	1.41593e-05	-2.29407	0.0217865
SH2D2A	31.5381	2.12026	0.033984
FAM49B	527.604	2.98501	0.00283573
ADRB2	0.9305	-0.0342858	0.972649
LITAF	0.13842	-0.97896	0.3276
ARPC2	771130	2.26857	0.0232943
PRDX5	9.1814	0.557579	0.577132
IRF1	0.0219627	-1.44897	0.147345
PSMB9	0.0122807	-1.11997	0.262728
FLNA	20.3738	2.23289	0.0255562
TGFB1	5.2399	0.927155	0.353846
RAC2	15211.8	2.80955	0.00496114
SEPT7	16.9356	1.03282	0.30169
GBP5	0.497672	-0.883787	0.376811
PPP1R18	10.1327	0.76774	0.442642
SKAP1	0.477618	-0.488763	0.62501
CCND3	0.0762224	-1.26518	0.205807
IFITM3	0.461871	-0.985799	0.324232
RASSF1	0.116922	-2.57625	0.00998798
PPIB	22014.7	1.45088	0.146812
SYTL1	0.0130986	-2.05155	0.0402131
STAT4	0.0941695	-1.16171	0.245355
PRKCH	2.33795	0.447002	0.654874
SYTL3	1.17852	0.119828	0.904619
PSME1	0.0392685	-0.867145	0.385862
IL2RG	0.10546	-0.984651	0.324796
LPCAT1	0.909701	-0.0824981	0.934251
MSN	0.0139766	-1.77774	0.0754458
CD38	0.11053	-0.738153	0.460422
TGFBR3	0.69255	-0.238533	0.811468
HLA-A	3.18552e-05	-1.13327	0.2571
MYL6	0.000127688	-2.25058	0.0244124
F2R	1.06959	0.0833424	0.933579
ASCL2	1.40039	0.441723	0.65869
PPP1CA	1.73857	0.215878	0.829083
TIGIT	0.901711	-0.169901	0.865088
ZEB2	0.198675	-1.23323	0.21749
PRMT2	4.67765	0.699471	0.484258
STARD3NL	316.323	1.35984	0.17388
EVL	0.381437	-0.735081	0.46229
HLA-E	3.54586e-07	-3.67303	0.000239694
LCP1	1.92186	0.742868	0.457562
ACTB	0.221098	-0.225826	0.821337
MYL12B	77.7494	1.33417	0.182147
CEBPD	0.285567	-1.38907	0.164813
EOMES	0.733589	-0.204323	0.838101
HLA-B	1.74139e-05	-1.71352	0.0866174
CD244	0.0706998	-1.98636	0.046993
TMSB4X	0.308652	-1.08258	0.278994
RPS15A	1.12147	0.0270187	0.978445
RPS29	0.0145977	-1.22862	0.219212
RPL29	8.26699	0.375253	0.707472
EEF2	8.43217e-05	-1.42688	0.153615
RPS27	1.18659	0.0458165	0.963457
NAP1L1	70.5758	0.925492	0.35471
RPL18	2.48401	0.267295	0.789242
RPS9	0.000900728	-2.18502	0.0288871
RPLP1	0.145699	-0.577274	0.563754
RPL8	2.13432	0.103561	0.917518
RPS5	1.2459	0.0315104	0.974863
RPLP0	1.57921e+23	2.40317	0.0162535
CD52	0.450748	-1.15739	0.247111
RPS8	0.429692	-1.41167	0.158048
VIM	11.1008	1.16296	0.244846
CD3G	2.09396	0.686129	0.492632
TRAC	0.181947	-1.10802	0.267852
CD3D	0.144354	-1.57761	0.114656
CD3E	9.72499	2.2205	0.0263851
COTL1	0.342379	-1.08929	0.276028
AIF1	0.101517	-1.68389	0.0922031
LTB	0.0872873	-1.05961	0.289321
RORA	0.0970992	-1.71639	0.0860911
CORO1A	43.0218	2.10637	0.0351721
NCF1	0.0560785	-2.91652	0.00353955
PIP4K2A	6.28151	1.05027	0.293595
PTGER2	0.344469	-1.92796	0.0538598
DENND2D	0.0007012	-2.8632	0.00419387
BSG	7.32818	0.771266	0.440549
UBC	3.55778e-14	-2.27426	0.0229503
MVD	0.829674	-0.267227	0.789294
DNAJC1	1.20561e-08	-4.15955	3.18872e-05
SH3BGRL3	5363.43	2.42776	0.0151926
RNF125	20.3719	2.78923	0.00528328
TSEN54	13.6959	1.3125	0.189351
HLA-F	0.0172709	-1.90708	0.0565099
RNASET2	3.99315	0.445423	0.656014
MAPK1	539.672	1.81046	0.070224
CISD3	11.6817	0.579333	0.562364
STK10	3.65711	0.498834	0.617896
PPP2R5C	3.88345	0.392219	0.694896
RPS4Y1	0.436757	-1.54896	0.121392
PTPN22	0.592198	-0.808725	0.418673
AKNA	0.463781	-0.602816	0.546631
LSP1	0.395289	-1.13427	0.256683
CHCHD10	0.983524	-0.00756642	0.993963
LYAR	26.9739	1.10533	0.269015
PLP2	40.1038	1.19145	0.233476
HLA-DRA	0.179084	-2.65069	0.00803279
UBE2F	0.269497	-0.453961	0.649857
CXCR4	0.00205239	-3.22893	0.00124256
MIB2	0.0068747	-2.02373	0.0429976
BTG1	0.108659	-0.931981	0.351346
SPINT2	0.493309	-0.96924	0.332425
SUN2	19.1126	1.2571	0.208717
FYN	0.765115	-0.255449	0.798377
AOAH	0.222929	-1.41938	0.155789
APOBEC3C	182.5	2.37102	0.0177392
GSTP1	0.272481	-0.69536	0.48683
PRR5	0.615583	-0.571472	0.567679
FCGRT	0.0868314	-1.76608	0.0773827
ANXA6	0.00272886	-2.71823	0.00656327
FGR	0.526833	-1.03808	0.299234
ARHGEF3	67.3557	1.82712	0.0676813
TBC1D10C	0.032299	-2.09861	0.0358516
CDC42	33.5367	0.924749	0.355096
MYC	3.59858	1.17079	0.241683
PTPRC	0.654575	-0.524116	0.600198
SLC25A6	0.000513576	-2.11714	0.0342484
ANP32B	61.9081	0.856761	0.391577
BST2	0.0431668	-1.24248	0.214059
FMNL1	2.39229	0.469051	0.639033
CYBB	0.0826938	-1.52722	0.126707
CDKN2D	0.998458	-0.00142372	0.998864
TCF25	2.37921e-06	-3.49771	0.000469275
PTPN7	1518.96	1.87482	0.0608171
PSMB8	5.69788	0.880596	0.378537
ARPC4	1.91516	0.619484	0.535598
RASAL3	142.828	2.34028	0.0192692
AQP3	0.366655	-0.485617	0.627238
SH2D1A	0.0686222	-1.75027	0.0800721
SDF2L1	0.145666	-0.633713	0.526268
BTN3A2	0.0737612	-1.60587	0.108303
ADAM8	2.04455	0.778076	0.436524
ANXA5	12.5042	0.539195	0.589752
YWHAZ	5.63858e+06	3.2184	0.0012891
ERP29	7.35412e-06	-2.52258	0.0116498
CTSH	3.23438	1.32245	0.186018
EBP	91.57	1.66465	0.0959824
HSP90AA1	28830.4	2.12402	0.0336686
WIPI1	0.00281708	-1.75894	0.0785881
ANXA1	3.25313	1.52452	0.127378
MACF1	0.151219	-0.595383	0.551588
MLLT6	0.21669	-0.33682	0.736252
BATF	19.1224	2.41102	0.0159081
IFNGR2	3.7939	0.331335	0.740391
YBX3	6.36769	2.07783	0.0377248
BIRC3	0.103926	-2.56514	0.0103135
TKT	4.78414	0.689474	0.490525
FTL	1.96912	0.0868287	0.930808
SIGIRR	0.228529	-1.1015	0.27068
RAB37	1.07581	0.0698481	0.944315
HENMT1	1.58507	0.204869	0.837675
SPI1	0.332817	-1.07721	0.281385
MYO1G	0.733627	-0.247602	0.804443
PXN	0.372729	-0.717297	0.473191
RAB29	1.25181	0.155312	0.876575
INPP5D	0.058216	-1.59709	0.110246
GCA	59.731	1.50293	0.132856
PRELID1	0.00115394	-2.05523	0.0398564
LGALS1	212.579	2.76129	0.00575735
OPTN	0.0790882	-1.2354	0.216681
CCDC12	0.803091	-0.0682496	0.945587
SIPA1	0.380919	-1.17895	0.238417
RHOF	0.673564	-0.19753	0.843413
FTH1	0.00675941	-1.47414	0.140443
HMOX2	2260.6	2.61449	0.00893595
MPEG1	0.0453839	-2.68438	0.00726649
SPCS2	7.79222e-08	-2.60401	0.00921392
CD55	434.715	2.31952	0.0203667
P4HB	10.9823	0.610147	0.541764
CFP	0.204879	-2.05536	0.0398446
DGKZ	13.1607	1.89812	0.0576802
PSMB10	0.172748	-0.840305	0.400737
GTF3C1	283.245	2.26852	0.0232976
POU2F2	0.011017	-1.91967	0.0548996
MEF2C	0.00401686	-1.56218	0.118246
TRAPPC1	12.607	0.761197	0.446539
FOSB	0.0913537	-2.87627	0.00402408
AES	0.395612	-0.444326	0.656807
FOS	0.0991959	-1.68637	0.0917238
TMEM14C	26.0749	0.714743	0.474768
IL12RB1	0.316187	-0.640883	0.521599
ZNF276	1.18824	0.0945578	0.924666
SERP1	1.44392e-05	-1.94178	0.0521641
LMAN2	0.00519985	-1.85823	0.0631371
SEC61B	0.000619154	-1.51989	0.128539
SSR4	0.00535944	-0.540283	0.589002
ADA	5.58548	1.36667	0.17173
ARHGAP9	0.25267	-0.699686	0.484123
COPE	0.77663	-0.162517	0.870898
LY86	0.00933199	-2.81878	0.00482072
ATM	0.000422657	-2.51778	0.0118096
MNDA	0.343505	-1.07011	0.28457
CBLB	3.39803	0.77781	0.436681
TMED9	1.39228e-08	-3.40025	0.000673252
FCN1	0.206249	-1.93919	0.0524782
NCF2	0.885887	-0.213585	0.830871
IKZF3	7.83556	0.938449	0.348014
GPR183	0.315762	-0.807598	0.419322
SASH3	0.0306769	-1.55758	0.119334
DDX5	0.0635257	-1.34902	0.177329
PPT1	0.444512	-0.138405	0.889921
LST1	0.0458119	-2.99255	0.00276654
CAPG	0.719107	-0.424823	0.670965
VCAN	0.00835349	-3.45363	0.000553098
SUB1	3333.99	1.22806	0.219423
RAB27A	0.0366399	-1.09053	0.27548
CFD	0.267773	-2.15234	0.0313702
SERPINA1	0.0465679	-1.7254	0.0844559
GBP2	0.922615	-0.0687094	0.945221
MT2A	0.0114233	-2.27425	0.0229512
RRBP1	2.29832	0.398498	0.690263
SCP2	5.14139	0.379214	0.704529
GRN	0.0132446	-1.75263	0.079666
APOL6	0.248096	-0.510575	0.609649
H1FX	0.163147	-0.589896	0.55526
CD36	0.0199399	-2.9924	0.00276796
MS4A6A	0.0135118	-2.53187	0.0113455
LMO4	0.00163093	-2.83144	0.00463388
CSF3R	0.140574	-1.23952	0.215153
PPA1	24691.5	2.31793	0.0204532
CTSB	0.00104316	-2.77724	0.00548232
TBCB	5157.24	2.77261	0.00556095
CSTA	0.252838	-0.920758	0.357177
HSP90B1	1.16555	0.0512987	0.959088
MANF	1.00405	0.00113995	0.99909
POLR2G	15071.7	1.97904	0.0478117
CDC42SE1	15371.6	2.58595	0.00971098
LYL1	0.0361293	-3.39355	0.000689932
PCSK7	1.38865	0.197306	0.843588
DSTN	0.0310317	-0.835775	0.403282
CD14	0.365507	-1.8952	0.0580659
S100A12	0.569546	-0.993467	0.320483
ARHGEF1	3.76928	1.46614	0.142611
STK4	20.1812	1.00364	0.315553
HCK	0.236722	-0.966081	0.334003
TSPAN32	0.145277	-1.38714	0.1654
TIMP2	0.425863	-1.00563	0.314591
HLA-DMA	0.0443918	-2.46199	0.013817
HLA-DMB	0.000206965	-3.25027	0.00115297
EVI2B	0.000718907	-2.09399	0.0362605
LYZ	0.167302	-2.26787	0.0233372
MARCKS	0.499419	-0.656421	0.511554
S100A9	0.390848	-1.80242	0.0714796
BZW1	3178.03	1.48701	0.137012
STK17A	0.508646	-0.444494	0.656685
ARHGAP30	1584.33	2.97704	0.00291049
C4orf48	0.09322	-1.43055	0.152559
PHPT1	8.21405	0.695403	0.486803
BRI3	0.0049911	-1.39806	0.162094
CLEC7A	7.03201	2.17879	0.0293473
SYPL1	2.08937	0.61426	0.539044
SSBP4	1.68464	0.360497	0.718476
TPM3	754.382	2.16972	0.0300284
BCL11A	0.281125	-1.10798	0.267872
DNPH1	5.46325	0.818964	0.412807
APP	2.03394	0.868572	0.385081
S100A8	0.236803	-1.99475	0.0460706
AP1S2	39.9259	1.68301	0.0923734
DUSP1	0.00146887	-2.49105	0.0127367
TNFSF13B	0.580546	-0.427551	0.668978
PDIA6	140.335	0.92626	0.354311
ALKBH7	0.0181671	-1.8068	0.0707939
LCK	0.367701	-0.886346	0.375431
RAB31	0.253109	-1.82345	0.0682359
SIRT2	0.0280603	-2.08713	0.0368762
ARHGDIB	113.238	1.65738	0.0974431
MAP3K8	0.379244	-1.1911	0.233613
LGALS3	1.99096	0.384641	0.700504
TPM4	0.0174674	-1.57887	0.114367
CREM	0.751692	-0.159994	0.872885
C19orf66	0.000818381	-1.87092	0.0613566
GNAS	0.112306	-0.408219	0.683113
BASP1	0.0405989	-2.53052	0.0113895
HSPA5	5.07606e-07	-3.12601	0.00177195
BHLHE40	0.525628	-1.07528	0.282251
CPVL	0.195954	-2.20654	0.0273462
RNASE6	1.49506	0.952673	0.340756
TRG-AS1	9.73201	2.11447	0.034475
RNF166	0.105577	-1.17301	0.240792
LGALS2	0.166529	-2.63874	0.00832158
SRPK2	12930.4	2.87463	0.00404505
PATL2	1.22411	0.247322	0.804659
SLC7A7	2.30722e-05	-5.21111	1.8771e-07
ALDH2	0.00702194	-3.61895	0.000295804
CD79A	0.0443373	-2.73756	0.00618971
ALOX5	0.0797984	-1.60137	0.109295
ARF6	157.629	1.55206	0.120649
ACTR3	299.406	1.13594	0.255982
CD8B	0.233435	-1.47424	0.140417
CCDC88A	47.0428	2.57932	0.0098994
IGSF6	0.27807	-1.7281	0.0839711
BTK	1.63445	0.154096	0.877534
IDI1	3.66515	0.421093	0.673687
CKAP4	0.000206899	-2.61743	0.00885946
WDR1	0.0517889	-0.93938	0.347536
PSTPIP1	2.06453	0.513433	0.607649
PEBP1	0.188274	-0.384099	0.700905
PRPF38B	5.11572	0.575392	0.565026
NCF4	0.125882	-1.35207	0.176352
FXYD5	1.808	0.18315	0.854681
TYMP	1.09897	0.0560271	0.95532
NFATC3	1.01235	0.00413075	0.996704
LINC00623	11.1502	1.02825	0.303833
PGD	9.48731	0.989926	0.32221
RGS2	1.37481	0.233118	0.81567
CELF2	0.201289	-0.599459	0.548867
CTSZ	4.0445	0.889052	0.373975
SLFN5	4.69859	1.14957	0.25032
BCL11B	0.129081	-1.50958	0.13115
IER2	0.0955811	-1.49694	0.134408
SULT1A1	0.0782126	-0.901661	0.367237
WIPF1	2203.96	2.12351	0.033711
PPP1R12A	2928.63	2.74276	0.00609246
PITPNC1	7.06897	1.21248	0.225327
KLF4	0.755724	-0.357183	0.720955
VAMP2	7.88275e-05	-3.55782	0.000373949
YWHAQ	3.73609e+10	3.11892	0.00181513
LILRA5	1.16891	0.0687892	0.945157
ATOX1	1.91845	0.509408	0.610466
CSK	357.785	1.66118	0.0966772
TMEM59	0.34477	-0.618535	0.536223
RBM47	0.0489401	-1.54745	0.121754
KDELR2	6.62597e-08	-3.33607	0.000849721
CAPZB	79.7494	0.907377	0.364207
SEC11C	4.323	0.318259	0.750288
PDK1	0.783197	-0.0912736	0.927275
GPX4	0.00110667	-2.0537	0.040005
PTPRA	6.26146	0.967171	0.333458
ACAP1	3.46379	0.977596	0.328274
MS4A7	0.0720802	-2.59769	0.00938533
C5AR1	0.445339	-1.59015	0.1118
RPA2	3.74939e-05	-2.17154	0.02989
SCPEP1	0.638749	-0.21759	0.827749
ITM2C	0.00732688	-2.29701	0.021618
COMMD7	1.05403	0.0299292	0.976123
RNF130	0.172209	-0.967077	0.333506
ICAM3	0.00921672	-2.81839	0.00482653
LEPROTL1	0.000546298	-1.79943	0.0719504
UCP2	1.22454	0.0667038	0.946817
BAX	3.78732	1.13467	0.256512
TMED10	0.02727	-1.0964	0.272903
JTB	7.88094e+09	2.93334	0.00335335
GIMAP4	0.445976	-0.978546	0.327804
RNF167	0.125875	-1.44918	0.147287
PRR13	255.471	1.19139	0.233499
PARP8	0.275102	-0.480172	0.631105
NAMPT	6.76215	1.35376	0.175814
TAOK3	0.0011086	-2.63957	0.00830118
FUS	33.8385	1.06132	0.288547
PDLIM2	0.118619	-1.75528	0.0792116
RABAC1	0.0469855	-0.843455	0.398974
DAD1	1.68344	0.118658	0.905546
CYTH1	0.685104	-0.236505	0.813041
NPC2	0.0902204	-0.775357	0.438129
FKBP2	2.95818e-05	-3.77223	0.000161798
MCL1	92.6473	1.4995	0.133745
CD74	0.000410877	-4.3125	1.61415e-05
NDUFS6	7746.38	2.59018	0.0095925
EHD1	0.196069	-1.45616	0.145348
SEC61G	5883.88	1.31147	0.1897
FAM107B	0.525381	-0.61186	0.54063
RALGPS2	87.7599	2.03861	0.0414893
GLRX	9.34692e-05	-3.22753	0.00124862
SLA	1.18738	0.142487	0.886695
RPS6KA1	0.362124	-0.70377	0.481576
COX17	0.665135	-0.544886	0.585832
DUSP2	0.633303	-0.811823	0.416893
TSC22D4	0.00545913	-1.71642	0.0860848
RASSF5	1.79784e+06	4.06954	4.71058e-05
DERL1	0.0273623	-0.647526	0.517292
ANAPC11	2.99579	0.605751	0.54468
CST3	1.5477	0.320011	0.74896
C1orf56	621.289	2.35916	0.0183163
SH3KBP1	0.0002441	-2.99777	0.0027196
CLEC12A	0.782701	-0.180985	0.856379
BLVRB	13.8844	1.43593	0.151024
SAMD9	590.812	2.91312	0.00357833
SPSB3	0.390947	-0.286855	0.774223
TALDO1	6354.94	1.93469	0.0530289
TSTD1	506.51	1.5959	0.110511
SH3BP1	9.62182	1.69678	0.0897379
TUBA1B	918229	2.30895	0.0209464
DEK	1.09568	0.14209	0.887009
LAMP1	0.0109151	-2.16699	0.0302357
NOP10	1933.97	1.48835	0.136659
DUSP6	0.699236	-0.418228	0.675781
CTSS	0.372021	-0.255267	0.798517
ARHGAP25	0.0032967	-2.18235	0.0290836
TMCO1	2.1415	0.201184	0.840555
TCF4	0.242953	-1.34147	0.179767
CUTA	2.56446e-06	-2.09039	0.0365826
CRELD2	0.0636208	-0.904819	0.365561
DDOST	0.0023086	-1.10224	0.270355
LRPAP1	0.00409119	-2.71516	0.00662431
ORAI1	8.06192	1.33718	0.181163
C9orf78	1.44776	0.122302	0.90266
SPCS3	0.00063033	-1.50328	0.132766
TRIM22	0.09725	-1.97126	0.0486942
CNOT6L	64.3909	1.9467	0.0515707
CYFIP2	1.62783	0.419984	0.674497
PRKACB	0.121386	-0.920718	0.357198
TUBB	4.5167e+08	4.71954	2.36373e-06
KRTCAP2	103.141	1.69748	0.089605
FGL2	0.0673826	-2.83603	0.00456786
APLP2	10.8236	0.886151	0.375536
TIMP1	3.17993	1.13077	0.258154
TSPO	2.76021	0.565383	0.571813
STXBP2	0.12746	-1.22364	0.221087
IL32	2.03902	0.680396	0.496254
SAT1	0.0192507	-1.81515	0.0695004
COMMD6	0.0109431	-1.38245	0.166833
OAZ1	0.0729568	-0.255115	0.798634
H3F3A	0.539911	-0.412417	0.680034
TMSB10	181.795	1.01284	0.311136
SLC25A5	57764.9	2.51533	0.0118921
COX7A2	80.7608	0.738121	0.460441
S100A6	4.60073	1.48126	0.138537
NDUFA4	105.758	0.827221	0.408112
SKP1	5.35113e-06	-1.90936	0.0562157
PRDX1	8.11929	0.633146	0.526639
SPCS1	2.61014e-05	-1.03117	0.302459
PPDPF	1.43771	0.224664	0.822241
GMFG	5.36268	1.02426	0.305715
H2AFZ	9.37714e+06	3.60854	0.000307922
NDUFB4	0.00241003	-1.36993	0.17071
TRMT112	4.41966e-07	-2.13905	0.032432
S100A11	52.5549	2.36444	0.0180575
ZNF706	0.000904349	-1.71383	0.0865593
NDUFB11	0.0144813	-0.950735	0.341739
PRDX2	0.722777	-0.153193	0.878246
LSM5	118.042	1.52333	0.127675
SEC62	2.64255e-06	-3.90847	9.28839e-05
HSPB1	3.60886	0.966041	0.334024
NDUFV2	551.223	1.75095	0.0799539
TXN	9.97261	0.69393	0.487726
NDUFB5	0.0913206	-0.476948	0.633399
ARL6IP5	1.01903	0.00610794	0.995127
NDUFC1	0.0312889	-1.30623	0.191474
TMEM258	1.35985e-11	-2.62042	0.00878217
ARPC1B	71.7254	1.5105	0.130916
TUBA4A	0.01431	-1.08092	0.279732
OSTC	1.64745	0.0766834	0.938875
CRIP1	4.88408	3.35248	0.000800919
TSC22D3	0.366793	-0.398854	0.690001
ATP6V0B	219.471	1.1725	0.240995
ATRAID	0.0096406	-1.08275	0.278921
SVIP	7.22427	0.757338	0.448847
NDUFAF3	0.408452	-0.28373	0.776617
AAK1	0.851714	-0.0547751	0.956318
EMC4	0.000577994	-1.48531	0.137461
N4BP2L2	0.01798	-1.78586	0.0741225
ISG20	1.99732	0.246717	0.805127
AP2S1	21.9028	0.636292	0.524586
IMPDH2	39.5755	1.48123	0.138545
MBNL1	6.63713	0.643899	0.519641
CNPY3	7.61899	0.770423	0.441049
STMN1	9.35429	1.15489	0.248136
TAGLN2	102.518	3.66811	0.000244348
ADI1	0.130371	-0.479495	0.631586
NENF	0.0597267	-1.06059	0.288876
PECAM1	0.00215108	-3.82685	0.000129792
MT1X	0.233313	-1.10207	0.270432
IKZF1	5.17124	0.712615	0.476084
PIM2	46.21	1.5904	0.111744
HEXB	0.000201957	-2.68094	0.00734162
RTN3	0.00360146	-1.21658	0.223765
ASAH1	0.000349947	-2.0275	0.042611
ARGLU1	4.64871	0.676684	0.498607
ANKRD44	0.0756998	-1.18556	0.235797
EIF4EBP1	39.7423	2.14055	0.0323099
TRBC1	0.880239	-0.0725998	0.942125
CD79B	0.0073595	-2.23939	0.0251306
IFT57	0.0585434	-1.30987	0.190241
SULF2	1.10122	0.138116	0.890149
RHOB	0.896857	-0.0831411	0.933739
ETS1	3.3666	1.01139	0.311829
GGH	583.024	3.45554	0.000549199
CKS1B	6003.14	4.5553	5.23112e-06
MT1E	0.150584	-1.18632	0.235497
CD59	0.000445314	-3.0847	0.00203758
LMNA	1.3221	0.103385	0.917657
MTHFD2	57.0777	1.36626	0.171857
PMVK	4896.13	2.85086	0.00436009
PTMS	0.155412	-1.36718	0.17157
CDC25B	1149.88	2.73644	0.00621082
NME1	20698.9	2.58502	0.00973744
HINT2	0.00100263	-1.50008	0.133593
COX5A	42.8727	0.882274	0.377629
CISD2	0.00814824	-1.67629	0.0936811
PRDX4	6.85631	0.367216	0.713458
PAICS	312224	3.78352	0.000154628
GUSB	83.2514	1.67594	0.0937491
MRPL51	0.212583	-0.317548	0.750828
ANXA2	62.8643	1.60091	0.109398
LRRC59	1.44209	0.123641	0.9016
ITGB1	2.42847	0.539484	0.589553
YWHAE	1.1869	0.0492608	0.960711
PARP1	591735	2.95765	0.00309992
MLEC	0.00428243	-1.06932	0.284924
EMC7	0.00648639	-1.34838	0.177538
ARL6IP1	490070	3.3652	0.000764887
UQCRQ	3.16343	0.204647	0.837848
RHEB	6.81495	0.410594	0.681371
MRPL23	1.24762	0.110228	0.912228
HIST1H1C	29.9372	2.19378	0.0282509
SNRPE	0.163823	-0.534148	0.593239
PRDX3	169.767	0.907019	0.364397
ZFP36L2	0.856435	-0.0829159	0.933918
PDIA4	1.99659	0.187283	0.851439
PDCD5	655.232	2.15654	0.0310417
LAMTOR2	124.287	1.9824	0.0474343
BUB3	1.87814	0.193416	0.846633
HSPD1	142.405	1.68031	0.0928965
TMEM208	3.57831	0.332026	0.73987
IFI6	0.636844	-0.47068	0.63787
NUCB2	0.00117607	-2.88772	0.00388044
HDAC1	0.00144065	-1.70132	0.0888833
MIF	4.91235e+10	3.8999	9.62324e-05
SSR3	5.27743	0.412973	0.679626
LMAN1	24.3435	1.57517	0.115217
NHP2	698.521	1.93425	0.0530824
EIF2S2	0.487452	-0.18951	0.849693
MYH9	6.39163	0.885469	0.375904
CAP1	0.0444618	-0.847269	0.396845
PPP1R14B	45.2347	2.12901	0.0332531
DERL3	0.00492461	-2.31119	0.0208222
RPS27L	1.92823e-06	-3.19166	0.00141459
S1PR4	0.716081	-0.27669	0.782018
GADD45GIP1	0.14325	-1.21117	0.225832
CANX	0.00430846	-1.30587	0.191598
CDV3	1.3573	0.109708	0.912641
UBXN4	0.0104426	-0.90311	0.366467
RPN2	0.00816444	-0.811593	0.417025
SRSF7	4751.03	1.84957	0.0643754
NDUFA11	0.161945	-0.509073	0.610701
PTP4A2	0.000109013	-1.80648	0.070844
TMBIM6	0.018755	-0.783529	0.433316
